# Supplementary material for: Overexpression of a serine hydroxymethyltransferase increases biomass production and reduces recalcitrance in the bioenergy crop Populus
Source: Royal Society of Chemistry journal article supplement (doi:10.1039/c8se00471d), 2018-11-02
Supplement: c8se00471d2.xlsx [file c8se00471d2.xlsx]

## Sheet: Table S1
Species	Gene ID	Gene Name	AA seq	AA length
Populus trichocarpa	Potri.001G212000	PtSHMT1	MDSKLNLGFHRTQIADDSISLQLDSSLRDLPTANPVSPVPLQLLEPLTESHYCNNQNGEKEEDDDDRDVEEFRILGHSLCFKRRRESDSLTSNRRETSSSSNGLDVEERRSLVKTWGNQPLSAADSEIFEIMEKEKERQFKGIELIASENFVCRAVMEALGSHLTNKYSEGMPAARYYGGNQYIDEIELLCCKRALEAFGLDSESWGVNVQPYSCTSANFAVYTGLLLPGDRIMGLDTPSGGNTSHGYYTPHGRKVSGASIFFESLPYKVNPQTGYIDFDKLEERALDFRPKILICGGSSYPREWGYARLRHIADKCGAVLMCDMAQISGLVAAKECLNPFVYCDIVTSTTHKSLRGPRGGIIFYRKGTKPRKRGIHLGQGDESDQYDFEEKINFAVFP…	578
	Potri.001G320400	PtSHMT2	MDPVTAWGNTSLESVDPEIHDLIEKEKRRQCRGIELIASENFTSFAVIEALGSALTNKYSEGMPGNRYYGGNEYIDQIENLCRSRALEAFHLDPTKWGVNVQPYSGSPANFAAYTAVLQPHDRIMGLDLPSGGHLTHGYYTSGGKKISATSIYFESLPYKVNSQSGYIDYDKLEEKALDFRPKLIICGGSAYPRDWDYKKFRSVADKCGALLLCDMAHISGLVAAQEAANPFEYCDIVTTTTHKSLRGPRAGMIFYRKGPKPPKKGQPENAVYDFEDKINFAVFPSLQGGPHNHQIGALAVALKQVQTPGFKAYAKQVKANAVALGNYLMGQGYKLVTEGTENHLVLWDLRPLGLTGNKVEKLCDLANITVNKNAVFGDSSALAPGGVRIGTPAMTSRG…	471
	Potri.002G090200	PtSHMT3	MDLTQAAQSGLSLRFHSSSIPIQLQLLDQKQETHIDNEENQTEDEQFSILGHQVCIKRPRDNSSQSSSSSSTTSSSKRVAMDPGLESRRAMVRAWGNHRLPVADPEIHEIMEKEKQRQFKGIELIASENFVCRAVMEALGSHLTNKYSEGLPGSRYYTGNQYIDQIELICWSRALAAFGLDSDKWGVNVQPYSCTSANFSVFTGLLLPGDRIMGLDSPSGGHLSHGYYTPGGKNVSASSIFFESLPYKVNPQTGYIDYDKMEEKAMDFRPKILICGGSSYPREWDYARFRQVADKIGAVLMCDMAHISGLVAAKECVSPFEYCDIVTSTTHKSLRGPRGGIIFYRKGPKLRKQGMLLSHGDGSSHYDFEEKINFAVHPSTQGGPHNNHIAALAIALKQV…	555
	Potri.002G109200	PtSHMT4	MAIALRRLSSSLRNPIKPYLNGGSLYYNMSSLPHKALPDEDKARANWIKQLNAPLEEIDPEIADIIELEKARQWKGLELIPSENFTSVSVMQAVGSVMTNKYSEGYPGARYYGGNEYIDMAETLCQKRALEAFGLDPQKWGVNVQSLSGSPANFQVYTALLKPHERIMALDLPHGGHLSHGYQTDTKKISAVSIFFETMPYRLNESTGYVDYDQLEKSATLFRPKLIVAGASAYARLYDYARIRKVCDKQKAVLLADMAHISGLVAAGVIPSPFEYADVVTTTTHKSLRGPRGAMIFFRKGVKEINKQGKEVMYDYEDKINQAVFPGLQGGPHNHTISGLAVALKQARTPEYKAYQEQVLSNCSKFAQSLIEKGYELVSGGTENHLVLVNLRNKGIDGS…	516
	Potri.005G170800	PtSHMT5	MDLTQAAQSGLSLGFHSSPIPLQLLDQKQETRIDNEENQTEDEQFSILGHQMCIKRPRDNSSQSSASSSTTNSSKRVAMDPGLESRRAMVRAWGNHPLPIADPEIHEIMEKEKQRQFKGIELIASENFVCRAVMEALGSHLTNKYSEGLPGSRYYTGNQNIDQIELICWSRALAAFGLDSDKWGVNVQPYSCTSANFAVYTGLLLPGDRIMGLDSPSGGHLSHGYYTPGGKRVSASSIFFESLPYKVNPQTGYIDYDKMEEKAMDFRPKILICGGSSYPREWDYARFRQVADRIGAVLMCDMAHISGLVAAKECVSPFEYCDIVTSTTHKSLRGPRGGIIFYRKGPKLRKQGMLSHGDGSSHYDFEEKINFAVHPSLQGGPHNNHIAALAIALKQVATP…	552
	Potri.006G232300	PtSHMT6	MQATSGAAVMGSLQQPVLSKGPAFPMKRSVIIGFPYQVKLNSVKPCRASSLEGSLVTGRPPSSVSVPIPETGADISSFKDYGLGEADPEVLEIINKEKDRQFKSLELIASENFTSRAVMEAVGSCLTNKYSEGLPGKRYYGGNEYIDELETLCQKRALASFNLDGKKWGVNVQPLSGSPANFEVYTALLKPHDRIMGLDLPHGGHLSHGFMTPKRRVSGTSIYFESMPYRLDESTGLVDYDMLEKTAILFRPKLIIAGASAYPRDFDYPRMRKIADAVGAFLMMDMAHISGLVAASVVADPFEYCDVVTTTTHKSLRGPRGGMIFFKKDPVLGVDMESAINNAVFPGLQGGPHNHTIGGLAVCLKHAQSPEFKAYQKQVICNSRALANRMVELGYKLVS…	559
	Potri.008G002900	PtSHMT7	MAMAIAMALRRLPSSFDKPLRPALFKATSLYYMSSLPDEAVYEKEKPGVTWPKQLNAPLEVVDPQIADIIELEKARQWKGLELIPSENFTSVSVMQAVGSVMTNKYSEGYPGARYYGGNEFIDMAESLCQKRALEAFRLDPAKWGVNVQSLSGSPSNFQVYTALLKPHERIMALDLPHGGHLSHGYQTDTKKISAVSIFFETMPYRLNESTGYIDYDQLEKSATLFRPKLIVAGASAYARLYDYARIRKVCDKQKAILLADMAHISGLVAAGVIPSPFEYADVVTTTTHKSLRGPRGAMIFFRKGLKEVNKQGKEVFYDYEDKINQAVFPGLQGGPHNHTIAGLAVALKQATTLEYKAYQEQVLSNCSKFAQSLVEKGYELVSGGTENHLVLVNLKNKG…	547
	Potri.010G254700	PtSHMT8	MAVAMTMALRRLSSSFDKPLRHALFKATSLYYMSSLPNEAVYEKEKPGVSWPKQLNAPLEAVDPQVADIIELEKARQWKGLELIPSENFTSVSVMQAVGSVMTNKYSEGYPGARYYGGNEYIDMAESLCQKRALEAFRLDPAKWGVNVQSLSGSPANFQVYTALLKPHERIMALDLPHGGHLSHGYQTDTKKISAVSIFFETMPYRLNESTGYIDYDQLEKSATLFRPKLIVAGASAYARLYDYARIRKVCDKQKATLLADMAHISGLVAADVIPSPFEYADIVTTTTHKSLRGPRGAMIFFRKGLKEVNKQGKEVFYDYEDKINQAVFPGLQGGPHNHTIAGLAVALKQATTVEYKAYQEQVLSNCAKFAQSLVEKGYELVSGGTENHLVLVNLKNKG…	520
	Potri.017G059300	PtSHMT9	MDPVTVWGNSSLQTVDPEIHDLIEKEKRRQCKGIELIASENFTSFAVIEALGSALTNKYSEGMPGNRYYGGNEYIDEIENLCRARALQAFHLDPTKWGVNVQPYSGSPANFAAYTAVLQPHDRIMGLDLPSGGHLTHGYYTSGGKKISATSIYFESLPYKVNPQTGFLDYDRLEEKALDFRPKLIICGGSAYPRDWDYKKFRSVADKCGALLLCDMAHISGLVAAQEAANPFEYCDIVTTTTHKSLRGPRAGMIFYRKGPKPPKKGQPEDAVYDFEDKINFAVFPSLQGGPHNHQIGALAVALKQAQSPGFKAYAKQVKANAVALGNYLMSKGYKLVTEGTENHLVLWDLRPLGLTGNKVEKLCDLANITVNKNAVFGDSSALAPGGVRIGAPAMTSRG…	471
Salix purpurea	SapurV1A.0004s0810		MAIALRRLSSSLRNPIKPYLNGGSLYYNMSSLPDKALPDKDTARANVSHHLFLHWIKQLNAPLEEIDPEIADIIELEKARQWKGLELIPSENFTSVSVMQAVGSVMTNKYSEGYPGARYYGGNEYIDMAETLCQKRALEAFGLDPQKWGVNVQSLSGSPANFQVYTALLKPHERIMALDLPHGGHLSHGYQTDTKKISAVSIFFETMPYRLNESTGYVDYDQLEKSATLFRPKLIVAGASAYARLYDYARIRKVCDKQKAVLLADMAHISGLVAAGVIPSPLEYADVVTTTTHKSLRGPRGAMIFFRKGVKEINKQGKEVMYDFEDRINQAVFPGLQGGPHNHTISGLAVALKQVKTPEYKAYQEQVLSNCSKFAQSLLEKGYELVSGGTENHLVLVNL…	524
	SapurV1A.0010s0510		MDLTQAAHSGLSLGFHLGPIPIQLQLLDKKQETRVDNEDNQVEDEQFSILGHQVCIKRARDNSSQSSSSSSTTNSFKRVTMDPGLESRRARVRAWGNHPLSVADPEIHEIMEKEKQRQYKGIELIASENFVCRAVMEALGSHLTNKYSEGLPGSRYYTGNQYIDQIELICWNRALAAFGLDSDKWGVNVQPYSCTSANFSVFTGLLLPGDRIMGLDSPSGGHLSHGYYTPGGKNVSASSIFFESLPYKVNPQTGYIDYDKMEEKAMDFRPKILICGGSSYPREWDYATFRQVADKIGAVLMCDMAHISGLVAAKECLSPFDYCDIVTSTTHKSLRGPRGGIFFYRKGPKLRKQGMLLSHSDGSSHYDFEEKINFAVHPSTQGGPHNNHIAALAIALKQV…	555
	SapurV1A.0058s0180		MDPVTAWGNSSLESVDPEIHDLIEKEKRRQCRGIELIASENFTSFAVIEALGSALTNKYSEGMPGNRYYGGNEFIDVIENLCRSRALEAFHVDPTKWGVNVQPYSGSPANFAAYTAVLEPHDRIMGLDLPSGGHLTHGYYTSGGKKISATSIYFESLPYKVNSQTGYIDYDKLEEKALDFRPKLIICGGSAYPRDWDYKRFRSVADKCGALLLCDMAHISGLVAAQEAANPFEYCDIVTTTTHKSLRGPRAGMIFYRKGPKPPKKGQPENAVYDFEDKVNFAVFPSLQGGPHNHQIGALAVALKQVQTPGFKAYAKQVKANAVALGNFLMGKGYKLVTEGTENHLVLWDLRPLGLTGNKVEKLCDLANITVNKNAVFGDSSALAPGGVRIGTPAMTSRG…	471
	SapurV1A.0331s0140		MDLTQAAQSGLSLGFHSSPIPLQLLDQKPETRIDNEENQTEDEQFSILGHQMCIKRPRDNGSQSSASSSTTNTSKRVAMDPGLESRRAMVRAWGNHPLSTADPEIYEIMEKEKQRQFKGIELIASENFVCRAVMEALGSHLTNKYSEGLPGSRYYTGNQNIDQIELICWSRALAAFGLDPDKWGVNVQPYSCTSANFAVYTGLLLPGDRIMGLDSPSGGHLSHGYYTPGGKKVSASSIFFESLPYKVNPQTGYIDYDKMEEKAMDFRPKILICGGSSYPREWDYARFRQVADKIGAVLMCDMAHISGLVAAKECVSPFDYCDIVTSTTHKSLRGPRGGIIFYRKGPRSRKQGMSSHDDGSSQYDFEEKINFAVHPSLQGGPHNNHIAALAIALKQVATP…	552
	SapurV1A.0633s0250		MAMAIAMALRRLSSSFDKPLRPALFKSTSLYYMSSLPDEAVYEKEKPGVTWPKHLNAPLEVVDPQIADIIELEKARQWKGLELIPSENFTSVSVMQAVGSVMTNKYSEGYPGARYYGGNEYIDMAESLCQKRALEAFRLDPAKWGVNVQSLSGSPANFQVYTALLKPHDRIMALDLPHGGHLSHGYQTDTKKISAVSIFFETMPYRLNESTGYIDYDQLEKSATLFRPKLIVAGASAYARLYDYARIRKVCDKQKAILLADMAHISGLVAAGVIPSPFEYADVVTTTTHKSLRGPRGAMIFFRKGLKEVNKQGKEVFYDYEDKINQAVFPGLQGGPHNHTIAGLAVALKQATTLEYKAYQEQVLSNCSKFAQSLVEKGYELVSGGTENHLVLVNLKNKG…	520
	SapurV1A.1164s0020		MDSKLTLGFHRTQIADDSICLQLDSSLRDLPAANSVSPIPLQLLEPLTGSPYSINQNGEKEDDDDDRDVEEFRILGHSLCLKRRRESDSSTRNKREASSSSNGVDVEERRRDLVKTWGNQPLSAADSEIFEIMEKEKERQFKGIELIASENFVCRAVMEALGSHLTNKYSEGMPGARYYGGNQYIDEIELLCCKRALEAFGLDSESWGVNVQPYSCTSANFAVYTGLLLPGDRIMGLDTPSGGNTSHGYYTPNGRKVSGASIFFESLPYKVNPQTGYIDFDKLEERALDFRPKILICGGSSYPREWGYARLRHIADKCGAVLMCDMAQISGLVAAKECLNPFDYCDIVTSTTHKSLRGPRGGIIFYRKGTKPRKRGIHLGQGDESDQYDFEEKINFAVF…	579
	SapurV1A.1207s0020		MQATSGAAVMGSLQQPVLTKGSAFPMKMSVIIGFPYQVKLKPCRASSLEGSLVTGRPPSSVSVPIPETGADTSSFKDYGLCEADPEVHEIINKEKDRQFKSLELIASENFTSRAVMEAVGSCLTNKYSEGLPGKRYYGGNEYIDELETLCQKRALASFNLDGKKWGVNVQPLSGSPANFEVYTALLKPHDRIMGLDLPHGGHLSHGFMTPKRRVSGTSIYFESMPYRLDESTGLVDYDMLEKTAILFRPKLIIAGASAYPRDFDYPRMRKIADAVGAFLMMDMAHISGLVAASVVADPFEYCDVVTTTTHKSLRGPRGGMIFFKKDPVLGVDMESAINNAVFPGLQGGPHNHTIGGLAVCLKHAQSPEFKAYQKQVISNSRALANRMVELGYKLVSGGS…	526
	SapurV1A.2110s0010		MDPVTAWGNSSLQTVDPEIHDLIEKEKRRQCRGIELIASENFTSFAVIEALGSALTNKYSEGMPGNRYYGGNEYIDEIENLCRARALQAFHLDPTKWGVNVQPYSGSPANFAAYTAVLQPHERIMGLDLPSGGHLTHGYYTSGGKKISATSIYFESLPYKVNSQTGFLDYDRLEEKALDFRPKLIICGGSAYPRDWDYKRFRSVADKCGALLLCDMAHISGLVAAQEAANPFEYCDIVTTTTHKSLRGPRAAKKGQPEDAVYDFEDKINFAVFPSLQGGPHKHQIGALAVALKQAQSPGFKAYAKQVKANAVAIGNYLMSKGYKLVTEGTENHLVLWDLRPLGLTGNKVEKVCDLANITVNKNAVFGDSSALAPGGVRIGAPAMTSRGLVEKDFEQIGE…	460
Eucalyptus grandis	Eucgr.E00603		MDPITFSDNSPLQRVDPEIHNLIREKKRQFCGIELSPSDIFTSFTVNEALSYALTNKNSNDVPSNHSCYGGSQLIDAFKDLGGTRALQAFGLDPACWGVIIQAYSSSPAKVATYTAFLEPHSRIMGLNLPSGPLLIHGYDISGSKKIYFESLPFDIDPSTSYIDYDKLKEKALDFCPDLIICGSSTYPRDWDYARFHSIANNCSALLLCDMANISGLVAAKEAKNPFEFCDVITTTTTESSRALMAGMIFYRKCHPALYDFEDKTAVFPSLQCGLQIHQIGVLAVSLKQAMSPQFKPYAKQVKANAVALGNYLMRKGYKLVTGGTDNHLVLWDLRPLRLTGNKVKKLCNRCGITLSKNAVFGYSSVKEPRGVLVGTHAMTCRGLVEKDFEQIGEFLHRA…	443
	Eucgr.E00610		MDPVTGSGTSLLQEVDPEIHDLIKEEKKRQFSGIELISSEIFISSTVNEALSHALTNKNSNGMPSNRHCYRDDQLIEALNNLCSTRALQAFRLDPACWGVIVQPYSGSPVKAAAWTTFLQPYSRIMGLHPYSSSEKIYCESLPLNISTGYIDYDKLEEKALDICPQLIICGSSAYPRDWDYARFHSIANKCGALLFCDMANISGLVAAQEAANPFEYCDIVTTTTNESSRALMAGMIFYRRRQPALYDFEHKTAVFPSLQCGLQKHQIGVLAVSLKQAMSPEFKAFAKRVKANAVALGNYLMSKGYKLVTGGTDNHLVLWDLRPLGLTGNKVEKLCNRCGITLSKNPVFGYSSVKEPRGVLVGTHAMSCRGLVEKDFEQIGEFLHRAVTITSTIQKQHG…	429
	Eucgr.F02167		MQAVGSVMTNKYSEGYPGARYYGGNEYIDMAETLCQKRALEAFGLDPAKWGVNVQSLSGSPANFQVYTALLKPHERIMALDLPHGGHLSHGYQTDTKKISAVSIFFETMPYRLNETTGYIDYDQLEKSAILYRPKLIVAGASAYARLYDYERIRKVCDKQKAILLADMAHISGLVAAGVIPSPFEYADVVTTTTHKSLRGPRGAMIFFRKGVKEINKKGQEVLYDYEDKINQAVFPGLQGGPHNHTITALAVALKQAMTPEYKAYQEQVLSNCSRFSQSLLEKGYELVSGGTENHLVLVNLRNQGIDGSRVEKVLESVHIAANKNTVPGDVSAMVPGGIRMGTPALTSRGFGEEDFARVADFFDAAVKLALKVKANSKGTKLKDFVATMQSDANIQSEI…	427
	Eucgr.F03735		MDISDCQSGLSLAFSSRSSTPAPLLSPSDAVSNHRGSASSLPLQLLEPKHDRSRESDEEGLSEEEEDEVEEDEEEEEDEEEFRILGHSMCLKRQRDGQLLPNSNAAKRVAVEQGVEGRRAAVKAWGTQPLSAADPEIHEIMEKEKQRQFKGIELIASENFVCRAVMEALGSHLTNKYSEGMPGSRNYTGNAYIDQIEFLCFKRALEAFHLDSDKWGVNVQCYSCTSANFAVYTGLLLPGDRIMGLDSPSGGHLSHGYYAPSGKKVSAASIFFESLPYKVNPQTGLVDYDKLEEKALDYRPKILICGGSSYPREWDYARFRHIADKCGSILMCDMAHISGLVAAKECASPFDYCDIVTSTTHKSLRGPRGGIIFYRKGVKSRKQGSLSSHGHDTTNYDFE…	587
	Eucgr.H02679		MDPVTAWGNSPLQAVDPDIHDLIEKEKRRQCRGIELIASENFTSFAVIEALGSALTNKYSEGMPGNRYYGGNEYIDQIENLCRSRALQAYRLDPTSWGVNVQPYSGSPANFAAYTAVLQPHDRIMGLDLPSGGHLTHGYYTSGGKKISATSIYFESLPYKVNSSTGYIDYDKLEEKALDFRPRLIICGGSAYPRDWDYARFRSVADKCGALLLCDMAHISGLVAAQEAANPFEYCDIVTTTTHKSLRGPRAGMIFYRKGPKPAKKGQPADAVYDFEDKINFSVFPSLQGGPHNHQIGALAVALKQAMSPGFKAYAKQVRANAVALGNYLMSKGYKLVTGGTENHLVLWDLRPLGLTGNKVEKLCDLCDITVNKNAVFGDSSALAPGGVRIGTPAMTSRG…	471
	Eucgr.I00580		MAMAMALRRLSSSIEKPLRPLINGGGSVCYMASLPNEAVYEKEKNGVTWPKQLNAPLEAVDPEVADIIELEKARQWKGLELIPSENFTSVSVMQAVGSVMTNKYSEGYPGARYYGGNEYIDMAESLCQKRALEAFRLDPAKWGVNVQSLSGSPANFQVYTALLKPHDRIMALDLPHGGHLSHGYQTDTKKISAVSIFFETMPYRLNESTGYIDYDQMEKSATLFRPKLIVAGASAYARLYDYARIRKVCDKQKAILLADMAHISGLVAAGVVPSPFEYADVVTTTTHKSLRGPRGAMIFFRKGVKEINKQGKEVLYDFEDKINQAVFPGLQGGPHNHTITGLAVALKQATTPEYRAYQEQVLSNCAKFAQTLTEKGYELVSGGTENHLVLVNLKNKGID…	519
	Eucgr.I00584		MAMAMAFRRLSSSIEKPLRPLINGGGSVCYMASLPNEAVYEKEKNGVTWPKQLKAPLEAVDPEVADIIELEKARQWKGLELIPSENFTSVSVMQAVGSVMTNKYSEGYSGVRYYGGNEYIDMAESLCQKRALEAFRLDPAKWGVNVQSLSGSPANFQVYTALLKPHNRIMALDLPHGGHLSHGYQTDTKKISAASIFSETMTYRLNESTGYIHYDQLEKSAPLFRPKLIVAGASAYARLYDYAGIRKQLSSVTVQSWERTLPCNLEIQCKVPDVCNRKGVKEINKQGKEVLYDFDDKIHQAVFPVLQGGPHNHTIAGLAVALKQVCFSDQISAVRGLHCMSNINCSLFSVRVQLMLILVVIEMIRSQLEKYVSSWNPFSYGQESLPLADLTRYFIGQCL…	431
	Eucgr.I02741		MDLSNSSSTLSLGFSQLPDDSASLQRDRKQPIPLQLLEPRARSPENNGAAAAENGEDEDDSDVEEFRILGHCIKRRRESEPASSSASSCKRIPIAAADVEERRAAIRSWGNESISEADPDLFEIMEREKNRQAKGIELIASENFVCKAVMEALGSHLTNKYSEGLPGERYYGGNQYIDEIETLCQERALAAFDLDSENWGVNVQPYSCTSANFEVYTGLLLPGDRIMGLDTPSGGNTSHGCYMPDGRKVSGASIFFESLPYKVNPQTGYIDFDKLEERAMDFHPKILICGGSSYPREWDYGRFRQIADKCGAVLMCDMAQVSGLVAAKECASPFDYCDIVTSTTHKSLRGPRGGIIFYRKGAKPRKRGTPPPQGNEIEYYNFEEKINFAVFPSLQGGPH…	571
	Eucgr.L01968		MKKNTENSLKRFSLQAVIASSDYMKLVQSLRGPRGGMIFFKKEPVLGVDLESAINNAVFPGLQGGPHNHTIGGLTVSLKFAQSPEFKAYQNKVVSNCKALASRLIELGYKLVSGGSENHLVLVDLRPMGIDGARVEKILDMASITLNKNSVPGDKSALVPGGIRIGSPAMTTRGFTEEEFKATADFINEGVQITLEAKRSAPGSKLQDFLNFVKSPDFPLKEKVSDLCRRVEALTTQFPLPGL*	243
Vitis vinifera	GSVIVG01003852001		MAMAMALWRLSSSVNKPVRSVFNGGSIYYMASLPNEAVYEEEKSRVTWPKQLNAPLGVVDPEIADIIELEKARQWKALELVPSENFTSVSVMQAVGSIMTNNVSEGYPGARYYGGNEYMDMAESLCQKRALEAFRLDPAKWGVNVQSLSGSPANFQVYTALLKPHERIMALDLPHGGHLSHGYQTDTKKISAVSIFFETMPYRLNESTGYIDYDQLEKSATLFRPKLIVAGASAYARLYDYAHIRKVCDKQKAILLADMAHISGLVAAGVIPSPFEYADIVTTTTYKSLRGPRGAMIFFKKGVKEVNKQGKEVLYDYEDKINQAVFPGLQSAPHNHTIAGLAVALKQATTPEYKAYQEQVLSNCSKFAETLMKKGYELVSSGTENHLVLVNLKNKGIDG…	518
	GSVIVG01003854001		MLCSDKXXXXXXXXXXXXXXXXXXXXXXXXXXXXXXXXXXPKLIVAGASAYARLYDYARIRKVCDKQKAILLADMAHISGLVAAGVIPSPFEYADIVTTTTHKSLRGPRGAMIFFRKGVKEVNKQGKEVLYDYEDKINQAVFPGLQGGPHNHTIAGLAVALKQVSMFGSCNPGTNTRTNVGTSSISQMMFQVNASEGGMMHL*	202
	GSVIVG01003856001		MAHISGLVAAGVIPSPFEYADIVTTTTYKSLRGPHGAMIFFKKGVKEVNKQGKEVLYDYEDKINQAVFPGLQSAPHNHTIAGLAVALKQATTPEYKAYQEQVLSNCSKFAETLMKKGYELVSGGTENHLVLVNLKNKGIDGSRVEKVLESVHIVANKNTVPGDVSAMVPSGIRMGTPALTSRGFVEEDFVKVAEYFDVAVTVAVKIKAETTGTKLKDFLAIMQSSPHLQYEIAKLRHEVEKYAKQFPTIGFEKETMKYKN*	260
	GSVIVG01003857001		MAMAMALWRLSSSVNKPVRSVFNGGSIYYMASLPNEAVYEEEKSRVTWPKQLNAPLGVVDPEIADIIELEKARQWKALELVPSENFTSVSVMQAVGSIMTNNVSEGYPGARYYGGNEYIDMAESLCQKRALEAFRLDPAKWGVNVQSLSGSPANFQVYTALLKPHERIMALDLPHGGHLSHGYQTDTKKISAVSIFFETMPYRLNESTGYIDYDQLEKSATLFRPKLIVAGASAYALQVTFLKYLTGL*	248
	GSVIVG01003859001		MAMAMALRRLSSSVDKPVRSVFNGGSIYYMASLPNEAVYEKEKSRVTWPKQLNAPLGVVDPEIADIIELEKARQWKGLELIPSENFTSVSVMQAVGSIMTNKYSEGYPGARYYGGNEYIDMAESLCQKRALEAFRLDPAKWGVNVQSLSGSPANFQVYTALLKAHERIMALDLPHGGHLSHGYQTDTKKISAVSIFFETMPYRLNESTGYIDYDQLEKSATLFRPKLIVAGASAYARLYDYARIRKVCDKQKAILLADMAHISGLVAAGVIPSPFEYADIVTTTTHKSLRGPRGAMIFFRKGVKEVNKQGKEVLYDYEDKINQAVFPGLQGGPHNHTIAGLAVALKQATTSEYKAYQEQVLSNCSKFAETLIKKGYELVSGGTENHLVLVNLKNKGIDG…	518
	GSVIVG01008954001		MDASHAQSGLSLGFHSHSSLAPMTPLADDSVKLQIASDFSNGEDEEFHILGHPMCLKRPRDEQFSRSSSPSKVALVESGLEQRRVAVRAWGNQPLSVADPDVFQIMEKEKKRQFKGIELIASENFVCRAVMEALGSHLTNKYSEGMPGARYYTGNDYIDQIELLCCRRALAAFHLDSEKWGVNVQPYSCTSANFAVYTGLLLPKDRIMGLDSPSGGHLSHGYYMPSGKKVSGTSIFFESLPYKVNPQTGYIDYDKLEEKALDFRPKILICGGSSYPREWNYARFRQIADKCGAVLMCDMAQISGIVAAKECASPFDYCDIVTSTTHKNLRGPRGGIIFYRKGAKARKPGMLLSQGDDSNQYDFEERINFAVFPSLQGGPHNNHIAALAIALKQVATPEY…	554
	GSVIVG01009226001		MALRGLASSVKKPIGPLINGGSLYYMSSLPNEVVCEKEKSRITWTKQLNAPLEVVDPEIADIIELEKARQWKGLELIPSENFTSVSVMQAVGSVMTNKYSEGYPGARYYGGNEYIDMAESLCQKRALEAFQLDPAKWGVNVQSLSGSPANFQAYTALLKPHERIMALDLPHGGHLSHGYQTDTKKISAVSIFFETMPYRLDEKTGYIDYDQLEKSAALFRPKLIVAGASAYARLYDYARIRKVCDKQKAVMLADMAHISGLVAAGVIQSPFEYADIVTTTTHKSLRGPRGAMIFFRKGVKEINKQGKEVLYDYEDKINQAVFPGLQGGPHNHTISGLAVALKQAMTPEYKAYQEQVLTNCSTFAQSLLEKGYELVSGGTDNHLVLVNLKNKGIDGSRVE…	514
	GSVIVG01021046001		MAHISGLVAAQEAANPFEYCDIVTTTTHKSLRGPRAGMIFYRKGPKPPKKGQPEDAVYDFEDKVNFAVFPSLQGGPHNHQIAALAVALKQAMVPGFKAYAKQVKANAVALGNYLMSKGYKLVTGGTENHLVLWDLRPLGLTGNKVEKLCDLCNITVNKNAVFGDSSALAPGGVRIGAPAMTSRGLVEKDFEQIAEFLHRAVTITLKIQKEHGKLLKDFNKGLVNNKDIEELKVDVEKFSASFEMPGFSVSEMKYKD*	256
	GSVIVG01022843001		MGLDTPSGGNTSHGYYTPNGRKVSGASIFFESLPYKVNPQTGYIDFDKLEERALDFRPKILICGGSSYPREWDYARFRQIADKCGAVLLCDMAQISGLVAAKECVNPFDYCDIVTSTTHKSLRGPRGGIIFYRKGTKPRKRGMILSQGDDNDHYDYEEKINFAVFPSLQGGPHNNHIAALAIALKQVATPEYKAYMLQVKKNAQALASALLRRKCRLVTGGTDNHLLLWDLRTLGLTGKNYEKVCEMCHITLNKIAIFGDNGTITPGGVRIGTPAMTSRGCLEADFETIADFLLRAAQIASVVQREHGKMQKAFLKGLESNKDIVELRTRVEIFATQFVMPGFDG*	345
	GSVIVG01035348001		MQACSGTAAMGSLQQPIWIKGSSFAPNGSTVNGFPHQIKLNSVKPCRSYIKGSLVTGKPPSSVSVTVPGNGDSGVNFIDHGLNEADPEVCAIIYKEKQRQMKSLELIASENFTSRAVMEAVGSCLTNKYSEGLPGKRYYGGNEFIDELETLCQKRALAAFHLDGKKWGVNVQPLSGSPANFEVYTALLNPHDRIMGLDLPHGGHLSHGFMTPKRRVSGTSIYFESMPYRLDESTGLVDYDMLEKTANLFRPKLIIAGASAYPRDFDYPRMRKIADGVGAFLMMDMAHISGLVAASVVADPFEYCDIVTTTTHKSLRGPRGGMIFFKKDSVLGVDLESAINNAVFPGLQGGPHNHTIGGLSVCLKHAQSPEFKAYQNQVVSNCRALAGRLIELGYNLVSG…	528
Arabidopsis thaliana	AT1G22020		MDRIAQSDLSLGFGSSHALPLPHPPRIPIADDSITLQIDSSFRPSSNPMPPVPLQLLEQRFDVTGSCSRVVEEDDEVVGDNDDDDQREEEQFILLGHPMKLKRGRGGNSYSLASSSPCKRFVVDSGIESRRAVVRAWGNQSIEEADPEIHEFMEKEKQRQFRGIELIASENFVCRAVMEALGSHLTNKYSEGMPGARYYTGNQYIDQIEILCQERALAAFGLNHEKWGVNVQPYSCTSANFAVFTGLLMPGERIMGLDSPSGGHMSHGYYTPGGKKVSGASIFFESFPYKVDPRTGYIDYDKLEEKALDYRPKILICGGSSYPRDWEFPRFRHIADKCGAVLMFDMAQISGLVAAKESPNPFDYCDIVTSTTHKSLRGPRGGIIFYKRGLKPKKQSINL…	599
	AT1G36370		MDLSRSQTNFQLGFGCSHASMTPTPTPRAPIADDSINLQVDQSFRSLPTTFSPIPLQLLEQKAEKTTTVDEPKKDGGGGGDQKEDEHFRILGHHMCLKRQRDCPLLLTQSKHPKRSSIGDSDLESRRAAVRAWGDQPIHLADPDIHELMEKEKQRQVRGIELIASENFVCRAVMEALGSHLTNKYSEGMPGARYYTGNQYIDQIENLCIERALTAFGLESDKWGVNVQPYSCTSANFAVYTGLLLPGERIMGLDSPSGGHMSHGYCTPGGKKISAASIFFESFPYKVNPQTGYIDYDKLEDKALDYRPKILICGGSSYPRDWDFARVRQIADKCGAVLMCDMAHISGLVATKECSNPFDHCDIVTSTTHKGLRGPRGGIIFYRRGPKIRKQGHHSSHCD…	598
	AT4G13890		MEPVYSWGNTHLDFVDPEIYDLIEKEKHRQCRGIELIAAENFTSVAVMEALGSCLTNKYSEGMPGNRYYGGTEFIDEIESLCRSRSLEAFHCNPEKWGVNVQPYSGSPANFAAYTALLQPHDRIMGLDLPSGGHITHGYYSSGGKNISATSIYFENLPYKVDSKTGYIDYDKLEEKAMDFRPKLIICGGTSYPREWDYARFRAVADKVGAFLLCDMAHNSALVAAQEAADPFEYCDVVTTSTHKSLRGPRAGMIFYRKGPKPAKKGQPEGEVYDFDAKINSAVFPALQSGPHNNKIGALAVALKQVMAPSFKVYAKQVKANAACLASYLINKGYTLVTDGTDNHLILWDLRPLGLTGNKVEKVCELCYITLNRNAVFGDTSFLAPGGVRIGTPAMTSRG…	470
	AT4G13930		MEPVSSWGNTSLVSVDPEIHDLIEKEKRRQCRGIELIASENFTSFAVIEALGSALTNKYSEGIPGNRYYGGNEFIDEIENLCRSRALEAFHCDPAAWGVNVQPYSGSPANFAAYTALLQPHDRIMGLDLPSGGHLTHGYYTSGGKKISATSIYFESLPYKVNFTTGYIDYDKLEEKALDFRPKLLICGGSAYPRDWDYARFRAIADKVGALLLCDMAHISGLVAAQEAANPFEYCDVVTTTTHKSLRGPRAGMIFYRKGPKPPKKGQPEGAVYDFEDKINFAVFPALQGGPHNHQIGALAVALKQANTPGFKVYAKQVKANAVALGNYLMSKGYQIVTNGTENHLVLWDLRPLGLTGNKVEKLCDLCSITLNKNAVFGDSSALAPGGVRIGAPAMTSRG…	471
	AT4G32520		MQACCGGNSMASLQQPGRVQGSVFPPIMPPVTKFSQQLKFNISKPFRSSFLKRNLVSEMRASSVSLPNVEISSKEIPFEDYGLGEVDPEVRTIITKEKDRQFRSLELIASENFTSRAVMEAVGSCLTNKYSEGLPGKRYYGGNEYIDQLETLCQNRALAAFRLDSTKWGVNVQPLSGSPANFAVYTAILSPHDRIMGLDLPHGGHLSHGFMTAKRRVSGTSIYFESMPYRLDESTGIVDYDMLEKTATLFRPKLIIAGASAYSRDFDYPRMRKIADSVGAFLMMDMAHISGLVAASVVADPFEYCDIVTTTTHKSLRGPRGGMIFFRKDPINGVDLESAVNNAVFPGLQGGPHNHTIGGLAVCLKHAQSPEFKAYQKRVVSNCRALANRLVELGFKLVS…	529
	AT4G37930		MAMAMALRRLSSSIDKPIRPLIRSTSCYMSSLPSEAVDEKERSRVTWPKQLNAPLEEVDPEIADIIEHEKARQWKGLELIPSENFTSVSVMQAVGSVMTNKYSEGYPGARYYGGNEYIDMAETLCQKRALEAFRLDPEKWGVNVQPLSGSPANFHVYTALLKPHERIMALDLPHGGHLSHGYQTDTKKISAVSIFFETMPYRLDESTGYIDYDQMEKSATLFRPKLIVAGASAYARLYDYARIRKVCNKQKAVMLADMAHISGLVAANVIPSPFDYADVVTTTTHKSLRGPRGAMIFFRKGVKEINKQGKEVLYDFEDKINQAVFPGLQGGPHNHTITGLAVALKQATTSEYKAYQEQVLSNSAKFAQTLMERGYELVSGGTDNHLVLVNLKPKGIDGS…	517
	AT5G26780		MALALRRLSSSVKKPISLLSSNGGSLRFMSSLSTAAMAESEKSRSSWIKQLNASLDEIDPEVADIIELEKARQWKGFELIPSENFTSLSVMQAVGSVMTNKYSEGYPGARYYGGNEYIDMAETLCQKRALEAFQLDPSKWGVNVQSLSGSPANFQVYTALLKPHERIMALDLPHGGHLSHGYQTDTKKISAVSIFFETMPYRLDENTGYIDYDQLEKSAVLFRPKLIVAGASAYARLYDYARIRKVCNKQKAVMLADMAHISGLVAAGVIPSPFEYADVVTTTTHKSLRGPRGAMIFFRKGLKEINKQGKEVMYDYEDRINQAVFPGLQGGPHNHTITGLAVALKQARTPEYKAYQDQVLRNCSKFAELDIRPTVIISYGLSMQTLLAKGYDLVSGGTD…	533
Medicago truncatula	Medtr2g006570		MDLSHHQSNLSLNFSSSHASPPPRPPIPDDSIALHLESSFRDPSNPVPTVPLQLMEPQTEKENGNAIDIESNNDEDDREVEEFRILGHSMCIKRRRDSESSTITTKRASVESDRGDRLLDLESRKAAVRSWGDQPLQVADPDIYEIIEKEKKRQFKGIELIASENFVCRAVMEALGSHLTNKYSEGMPGARYYGGNQYIDEIETLCCERALAAFNLDPKCWGVNVQPYSCTSANFAVYTGLLAPGDRIMGLDTPSGGNTSHGYYTPNGKKVSGASIFFESLAYKINPQSGFIDYDKLEERALDFRPKILICGGSSYPREWDYARFRHVADKCGAVLLCDMAQISGIIAAKECVNPFDYCDVVTSTTHKSLRGPRGGIIFYRKGTKPRKRGILLTQGHES…	593
	Medtr2g018290		MPAACSGVASMIGYLQQPPLSSTKLHNFSHGGLLPQLHFNNNNHFKPCCKVSIHEATFGKSSSSSSSPSSLPKKIGGDGSSFLDYGLSEADPDVHAIINKEKDRQFRSLELIASENFTSKAVMEAVGSCLTNKYSEGLPGKRYYGGNEHIDELEILCQQRALAAFHLDGDKWGVNVQPLSGSPANFAVYTAILKPHDRIMGLDLPHGGHLSHGFMTAKRRVSGTSIYFESMPYRLDESTGVIDYDMLEKTAALFRPKLIIAGASAYPRDIDYARFRKIADSVGAFLMMDMAHVSGLIAASVLADPFEFVDIVTTTTHKSLRGPRGGMIFFKKDAVHGVDLESAINNAVFPGLQGGPHNHTIGGLAVCLKYAQSPDFKNYQNQVVANCRALANRLVEHEY…	533
	Medtr3g073470		MDAQAGLSLGLNATMPSPTNSSNGSLTDNSFSFHLNSKPNPSLSWRLLHEKPDNNVHLNLIKQEQEQDEVVDGVGEEEGETIDFMGRPICFKRRLEEETQQSFVPAKRVAVDSKAVSWGNQPLSVADPEIFTIMEKEKLRQFKGIELIASENFVCRAVMEALGSHLTNKYSEGMPGAKYYTGNQYIDQLEFLCCERALNAFHLDSSNWGVNVQPYSCTSANFAVYTGLLNPGDRIMGLDSASGGHLSHGYYTHGGKKVSAASIFFETLPYKVNPLTGYIDYDKVEEKAVDYRPKILICGGSSYPREWDYARFRKIADKCGAVLMCDMAHISGLVAAREVASPFDYCDIVTSTTHKSLRGPRGGIVFYRKGPKPRKQGFVLNHGDDNSNYDFEEKINFAL…	577
	Medtr3g084310		MDPVSEWGNTPLVTVDPEIHDLIEKEKRRQCRGIELIASENFTSFAVIEALGSALTNKYSEGMPGNRYYGGNEFIDQIENICRSRALTAFHLDAATWGVNVQPYSGSPANFAAYTAVLNPHDRIMGLDLPSGGHLTHGYYTSGGKKISATSIYFESLPYKVNSTTGFIDYDRLEEKALDFRPKLIICGGSAYPRDWDYGRFRQVADKCGALLLCDMAHISGLVAAQEANDPFAFCDIVTTTTHKSLRGPRAGMIFYRKGPKPPKKGQPENAVYDFEDKINFAVFPSLQGGPHNHQIGALAVALKQATTPGFKAYAKQVKANAVALGNYLISKGYSLVTGGTENHLVLWDLRPLGLTGNKVEKLCDLCNITVNKNAVFGDSSALAPGGVRIGAPAMTSRG…	471
	Medtr5g030950		MAMAMALRRLSSSINKSSRPLFSASSVYYKSSLPDEAVYDKENSRVSWPKQLNSSLEEIDPEIADIIELEKARQWKGLELIPSENFTSLSVMQAVGSIMTNKYSEGYPGARYYGGNEYIDMAETLCQKRALEAFRLDPAKWGVNVQPLSGSPSNFHVYTALLKPHDRIMALDLPHGGHLSHGYQTDTKKISAVSIFFETMPYRLDESTGYIDYDQLEKSATLFRPKLIVAGASAYARLYDYARIRKVCDKQKAVMLADMAHISGLVAAGVIPSPFDYADVVTTTTHKSLRGPRGAMIFFRKGLKEVNKQGKEVFYDYEDKINQAVFPGLQGGPHNHTITGLAVALKQATTPEYKAYQEQVLSNCAKFAQALSEKGYELVSGGTENHLVLVNLKNKGIDG…	518
	Medtr5g067060		MAMALRRLTSTINKPTSLYRLSSSLSAQHTHKSHPDWIKQLNDPLGVVDPEIEDIIELEKARQWKGLELIPSENFTSLSVMQAVGSVMTNKYSEGYPGARYYGGNEYIDMAETLCQKRALETFGLDPTQWGVNVQSLSGSPSNFQVYTALLKPHERIMALDLPHGGHLSHGYQTDTKKISAVSIFFETMPYRLDESTGYIDYDQMEKSAALFRPKLIVAGASAYARLYDYARIRKVCDKQKAVMLADMAHISGLVAAGVIPSPFDYADVVTTTTHKSLRGPRGAMIFFRKGLKEINKKGQEVLYDYEDKINQAVFPGLQGGPHNHTITGLAVALKQAMTPEFKNYQKQVLSNSSTFAQSLLEKGYDLVSGGTENHLVLVNLRNKGIDGSRVEKVLESVH…	507
	Medtr7g108420		MASENYTSRAVMEALGSCCTNKYSEGSPGNRYYGGNVNIDEIEILCQERALAAIHLDSNKWGVNVQPLSGSPANSAVYDAILEPHDRIMYLDLAHGGHLSHGHMTPTRKVSSTSKYFTTMPYHLDDLTGRIDYHMLAKTASIFRPKLIIAGASAYPRDIDYARMRKVCFDHPTILILIICFSVLFLSGLVAASVLADPFEFSDIVTTTRFALKYLCPRGGMIFFKKESVHGIDLESAINKAVLPGRQGGPHNHTIAGLVVANCRAFANRLIEHQYKLVSGDSNNHLILVDLRPSGIDGARGEKILGMASITLNKNSVPGDKSAQVPGGIRIGTPAMTTRGLGEKEFELIADLIHEGVQISLEAKCLVLGTKVQDFTNFVSSPEFPLGEKVSDLRRKVEA…	409
	Medtr8g081510		MDPVSEWGNTPLVTVDPEIHDLIEKEKRRQCRGIELIASENFTSFAVIEALGSALTNKYSEGMPGNRYYGGNEFIDQIENLCRSRALQAFHIDPQSWGVNVQPYSGSPANFAAYTAVLNPHDRIMGLDLPSGGHLTHGYYTSGGKKISATSIYFESLPYKVNSTTGFIDYDRLEEKALDFRPRLIICGGSAYPRDWDYKRFRDVADKCGALLLCDMAHFSGLVAAQEVNNPFEYCDIVTTTTHKSLRGPRAGMIFYRKGPKPPKKGQPENAVYDFEDKINFAVFPSLQGGPHNHQIGALAVALKQAMSPGFKAYAKQVKANAVAIGNYLMSKGYSLVTGGTENHLVLWDLRPLGLTGNKVEKLCDLCNITVNKNAVFGDSSALAPGGVRVGAPAMTSRG…	471
Glycine max	Glyma.02G217100		MAMALPLRRLSSTLNKPLASATSIYHRMSSSLSAQEKDKSRADWIKQLNDPLETIDPEIADIIELEKARQWKGFELIPSENFTSLSVMQAVGSVMTNKYSEGYPGARYYGGNEYIDMAETLCQKRALEAFRLDPAKWGVNVQSLSGSPSNFQVYTALLKPHERIMALDLPHGGHLSHGYQTDTKKISAVSIFFETMPYRLNESTGYIDYDQLEKSAVLFRPKLIVAGASAYARLYDYARVRKVCDKQKAVLLADMAHISGLVAAGVIPSPFDYADVVTTTTHKSLRGPRGAMIFFRKGVKEINKQGKEVLYDYEDRINQAVFPGLQGGPHNHTISGLAVALKQAMTPEFKNYQKQVLSNCSAFAQSLLEKGYELVSGGTDNHLVLVNLRNKGIDGSRVE…	514
	Glyma.04G254300		MVDHDLQQETQKDSYISTLCSLLNHYLPFFHSPVLSVSLFPSSRQNAHFPISHFPFLVQPMDSQPGLSLGLSVPLSSPAAPLCDTTSVLWRLFNKRHPIKEEEEEDEDYGETINFMDQSVKRKIEGHQQPCFPSKRVAVDSSVGWWNQPLGVADPEIFYIMGKEKQRQFKGIELIASENFVCRAVMEALGSHLSNKYSEGMPGAKYYTGNQYIDEIEFLCCQRALLAFDLHPNNWGVNVQPYSCTSANFAVYTGILHPGDRIMGLDSPSGGHLSHGYYTLGGKKVSAASIFFETLPYKVNPQSGYIDYDKLEEKALDFRPKILICGGSSYPREWDYARFRQVADKCGAVLMCDMAHISGLVAAKEVASPFDYCDIVTSTTHKSLRGPRGGIIFYRRGAK…	603
	Glyma.05G152100		MDPVSVWGNTPLATVDPEIHDLIEKEKHRQCRGIELIASENFTSFAVIEALGSALTNKYSEGMPGNRYYGGNEFIDQIENLCRSRALQAFHLDAQSWGVNVQPYSGSPANFAAYTAVLNPHDRIMGLDLPSGGHLTHGYYTSGGKKISATSIYFESLPYKVNSTTGYIDYDRLEEKALDFRPKLIICGGSAYPRDWDYKRFREIADKCGALLLCDMAHTSGLVAAQEVNSPFEYCDIVTTTTHKSLRGPRAGMIFYRKGPKPPKKGQPENAVYDFEDKINFAVFPSLQGGPHNHQIGALAVALKQAASPGFKAYAKQVKANAVALGNYLMGKGYSLVTGGTENHLVLWDLRPLGLTGNKVEKLCDLCNITVNKNAVFGDSSALAPGGNLDEVSYQILYC…	479
	Glyma.06G107800		MDSQPGLSLGLSATLSSPAAPLSDTTSVPWRLFNERHPKKEEQQEEEKEDEDGGETINFMDQRVKRKIEGHQQQPCFPSKRVAVDSSVGWWNQPLGVADPEIFDIMQKEKRRQFKGIELIASENFVCRAVMEALGSHLSNKYSEGMPGAKYYTGNQYIDEIEFLCCQRALLAFDLHPNNWGVNVQPYSCTSANFAVYTGILHPGDRIMGLDSPSGGHLSHGYYTLGGKKVSAASIFFETLPYKVNPQSGYIDYDKLEEKAMDFRPKILICGGSSYPREWDYARFRQAADKCGAVLMCDMAHISGLVAAKEVASPFDYCDIVTSTTHKSLRGPRGGIIFYRRGIKLRKQGFVHNHGDDSNYDFEEKINFALYPSLQGGPHNNHIAALAIALKQVATPEYK…	548
	Glyma.08G108900		MAPMPNGRFKSSPTSTSEIMNYEIKMLPTFKNEHIRTHISIPPQQTQQHSLFSLLAFRSSLTLIHSFPPFMDPVSVWGNTPLATVDPEIHDLIEKEKRRQCRGIELIASENFTSFAVIEALGSALTNKYSEGMPGNRYYGGNEYIDQIENLCRSRALQAFHLDAQSWGVNVQPYSGSPANFAAYTAVLNPHDRIMGLDLPSGGHLTHGYYTSGGKKISATSIYFESLPYKVNSTTGYIDYDRLEEKALDFRPKLIICGGSAYPRDWDYKRFREVADKCGALLLCDMAHTSGLVAAQEVNSPFEYCDIVTTTTHKSLRGPRAGMIFYRKGPKPPKKGQPENAVYDFEDKINFAVFPSLQGGPHNHQIGALAVALKQAASPGFKAYAKQVKANAVALGKYL…	572
	Glyma.08G187800		MDLSHPQSNLSLGFSSSHASPPRRSDPPVPLQLMEPQTENGNNLDVESDDDDDDKEVEEFRILGHSMCLKRRRDCDSSSSSAAAAKRVSVEPDLDARKAAVRAWGCQPLSIADPDIHEIMEKEKKRQFCGIELIASENFVCRAVMEALGSHLTNKYSEGMPGSRYYGGNQYIDEIETLCCERALNAFGLDPKCWGVNVQPYSCTSANFSVYTGLLLPGDRIMGLDTPSGGNTSHGYYTPNGKKVSGASIFFESLPYKVNPQTGYIDYDKLEERALDFRPKILICGGSSYPREWDYARFRHIADKCGAVLLCDMAQISGIIAAKECVNPFDYCDIVTSTTHKSLRGPRGGIIFYRKGTKPRNRGILLSQGHESDQYDFEEKINFAVFPSMQGGPHNNHIA…	566
	Glyma.08G274400		MAMAMALRRLSSSIDKPLRPLFNAGSLYYKSSLPDEAVYDKERPGVTWPKQLNAPLEVVDPEIADIIELEKARQWKGLELIPSENFTSVSVMQAVGSVMTNKYSEGYPGARYYGGNEYIDMAETLCQKRALEAFRLDPAKWGVNVQPLSGSPANFHVYTALLKPHERIMALDLPHGGHLSHGYQTDTKKISAVSIFFETMPYRLNESTGYIDYDQMEKSATLFRPKLIVAGASAYARLYDYERVRKVCDKQKAILLADMAHISGLVAAGVIPSPFDYADVVTTTTHKSLRGPRGAMIFYRKGVKEINKQGKEVLYDYEDKINQAVFPGLQGGPHNHTITGLAVALKQATTPEYRAYQEQVLSNSFKFAQALSERSYELVSGGTENHLVLVNLKNKGIDG…	518
	Glyma.09G202000		MAMAMAMALGRLSSSFNKPLRPLFNAGSVYYKSSLPAEAAYDNEKSCDTELNAPLEVVDPEIADIIELEKARQWKGLELIPSENFTSVSVMQAIGSIITNTRNEGYPGARYYGGNEYIDMAETLCQKRALEAFRLDPAKWGVNVQPLSGSSANFQVYTALLKPHDRIMGLDLPHGGHLSHGYQTDTNKVSAVSLFFETMPYRLNENTGHIDYDQLESTAKLFRPKLIVAGATAYARLYDYARIRKVCDKQKAVLLADMAHISGLVAAGVIPSPFDYADVVTTTTHKSLRGPRGAMIFFRKGVKEINEKGEEVMYDYEDKINRAVFPGLQSGPHFHSITGLAVALKQATTPNYRAYQEQVLRNCSKFAQALSEKGYELVSGGTENHLLLVNLKSKGIDGS…	517
	Glyma.12G159200		MQLQILGDGSSFLDYGLSEVDPEVHAIIDKEKDRQFKTVMEAVGSCLTNKYSEGLPSKRYYGGDEYIDELETLCQQRALATFHVDGNKWGDCITLYGSLANFAVFTAVLKPHDRIMDLNLPHGGHLSHGFMTPKKCLIDYDMLEKTATLFRPKLIIAGASAYPRDIDSPRMRKIADEVGAFLMMDMAQIYIVIIPRIKQ	198
	Glyma.12G170300		MDLSHPQSNLSLGFSSSHASPPPRSDPPVPLQLMEPQTENGNLDVESDDDEDKEVEEFRILGHSMCLKRRRDCDSSSSSSAAKRVSVEPDLDARKAAVRAWGCQPLSIADPDVHEIMEKEKKRQFRGIELIASENFVCRAVMEALGSHLTNKYSEGMPGARYYGGNQYIDEIETLCCERALNAFGLDPKCWGVNVQPYSCTSANFAVYTGLLLPGDRIMGLDTPSGGNTSHGYYTPNGKKVSGASIFFESLPYKVNPQTGYIDYDKLEERALDFRPKILICGGSSYPREWDYARFRHIADKCGAVLLCDMAQISGIIAAKECVNPFDYCDIVTSTTHKSLRGPRGGIIFYRKGTKPRKRGILLSQGHESDQYDFEEKINFAVFPSMQGGPHNNHIAALA…	563
	Glyma.13G222300		MQACTTMSSLQQQPIWTKGLNFPAKGYGSNNGFLPQVRFCNIKPSKASHVEASLVTGKPSSVPFSVPEIGGDGSSFLDYGLSEADPDVRAIIDKEKDRQFKSLELIASENFTSRAVMEAVGSCLTNKYSEGLPGKRYYGGNEYIDELEILCQQRALAAFHVDENKWGVNVQTLSGSPANFAVYTAVLKPHDRIMGLDLPHGGHLSHGFMTPKKRVSATSIYFESMPYRLDESTGLIDYDMLEKTATLFRPKLIVAGASAYPRDIDYPRMRKLITSYMHGKIADEVGAFLMMDMAHISGLVAASVLSNPFEYCDIVTTTTHKSLRGPRGGMIFFKKDTVHGVDLEPAINNAVFPGLQGGPHNHTIGGLAVCLKYAQSPEFKNYQNQVVANCRALAKRLIE…	536
	Glyma.14G184500		MAMALRRLNKPFSNATSIYRQSSSLSAHEKHKSRADWIKQLNDPLEAIDPEIADIIELEKARQWKGFELIPSENFTSLSVMQAVGSVMTNKYSEGYPGARYYGGNEYIDMAETLCQKRALEAFQLDPAKWGVNVQSLSGSPSNFQVYTALLKPHERIMALDLPHGGHLSHGYQTDTKKISAVSIFFETMPYRLNESTGYIDYDQLEKSAALFRPKLIVAGASAYARLYDYARVRKVCDKQKAVLLADMAHISGLVAAGVIPSPFDYADVVTTTTHKSLRGPRGAMIFFRKGVKEINKQGKEVLYDYEDKINQAVFPGLQGGPHNHTISGLAVALKQAMTPEFKNYQKQVLSNCSAFAQSLLEKGYELVSGGTDNHLVLVNLRNKGIDGSRVEKVLEAVH…	507
	Glyma.15G089900		MAHISGLVAASVLANPFEYCDIVTTTTHKSLRGPRGGMIFFKKDTVHGVDLEPAINNAVFPGLQGGPHNHTIGGLAVCLKYAQSPEFKNYQNQVVANCKALAQQLIEHGYKLVSGGSDNHLVLVDLRPSGLDGARVEKILDMASITLNKNSVPDDKSALVPGGIRIGTPAMTTRGLGEKEFSLIADFLHEGVQICLEAKSLVSGTKLQDFLKFVSSSEFPLGEKISELRRKVEALTTQYPIPGV*	244
	Glyma.16G108100		MLFEFMTKNDLFCPWNHMQLQILGDGSSFLDYGLSEADPEVRAIIDKEKDRQFKSLELIASENFTSRAVMEAVGSCLTNKYSEGLPGKRYYGGNEYIDELETLCQQRALATFHVDGNKWGVNVQALSSSPANFAVFTAGLDLPHGGHLSHGFVTPKKRVSATSIYFECLIDYDMLEKITTLFRPKLIIVGASAYPRDIDYPCMRKVCFVLMHFLEL*	216
	Glyma.18G150000		MAMAMALRRLSSSIDKPLRPLFNAGSLYYKSSLPDEAVYDKERPGVTWPKQLNASLEVVDPEIADIIELEKARQWKGLELIPSENFTSVSVMQAVGSVMTNKYSEGYPGARYYGGNEYIDMAETLCQKRALEAFRLDPAKWGVNVQPLSGSPANFHVYTALLKPHERIMALDLPHGGHLSHGYQTDTKKISAVSIFFETMPYRLNESTGYIDYDQMEKSATLFRPKLIVAGASAYARLYDYERVRKVCDKQKAILLADMAHISGLVAAGVIPSPFDYADVVTTTTHKSLRGPRGAMIFYRKGVKEINKQGKELLYDYEDKINQAVFPGLQGGPHNHTITGLAVALKQATTPEYRAYQEQVLSNSFKFAQALSERGYELVSGGTENHLVLVNLKNKGIDG…	518
Oryza sativa	LOC_Os01g65410		MDLSRPESSDLSLGFHSLGHARGHAVTGPLRLFDDMEDAKPEKSVGGGGGGGGGGGEEEDGEEGGDQHFSLLGHALCVKRPRRALYGGGGGGGAGGGGGGGGEASSCSSSSSSLHPAKRQATAERGADLEARRGAVRAWGNQALAEADPDVHALMELERDRQVRGIELIASENFVCRAVLEALGSHLTNKYSEGHPGARYYGGNQHIDGIERLCHERALAAFGLDPACWGVNVQPYSCTSANLAVYTGLLLPKDRIMGLEPPSGGHVSHGYYTPSGKKVSGASIFFESLSYKVNPQTGYIDYDKLEERAMDFHPKILICGGSSYPREWDFARMRLIADKCGAVLMCDMAHISGLVAAKECRSPFDYCDVVTSTTHKNLRGPRGGIIFFRRGKNLRRRTG…	600
	LOC_Os03g52840		MAMATALRKLSSDALRRQPLSRITPLYYMASLPATEERSGVTWPKQLNAPLEEVDPEIADIIEHEKARQWKGLELIPSENFTSVSVMQAVGSVMTNKYSEGYPGARYYGGNEYIDMAESLCQKRALEAFRLDPAKWGVNVQPLSGSPANFHVYTALLKPHERIMALDLPHGGHLSHGYQTDTKKISAVSIFFETMPYRLDESTGLIDYDQMEKSAVLFRPKLIVAGASAYARLYDYDRMRKVCDKQKAILLADMAHISGLVAAGVVPSPFDYADVVTTTTHKSLRGPRGAMIFYRKGVKGVNKQGKEVMYDFEDKINAAVFPGLQGGPHNHTITGLAVALKQATTPEYRAYQEQVMSNCAKFAQSLTAKGYELVSGGTDNHLVLVNLKSKGIDGSRVEK…	513
	LOC_Os05g35440		MLDRATGGRRRAAGEGMDHRPDLSLALHPPPPPEGSSAAAAEEVGEEEAEGGEGRFSLMGQPLFLKRPRPRPPRPPRARGVGDDVDVDVDDDSSPCCSSSCLSPAAKRRAAAGGLEARRAAVRAWGCQPLTEADPDVHELMERERRRQAGGVELIASENYACRAVLDALGSHLTNKYSEGLPGARYYCGNQHIDAIERLCCDRALAAFGLDPSRWGVNVQPYSCTSANFAVYTGLLLPNDRIMGLDSPSGGHVSHGYYTPSGKKVSGASIFFENLSYRVNPHTGYIDYDKVEEKAVDFHPKILICGASSYPRDWDYARMRLVADKCGAVLMCDMAQISGLVAAKECRNPFDYCDIVTSTTHKSLRGPRGGIIFFRKGKNLRKRVGSLTQVVENDQYDFE…	587
	LOC_Os11g26860		MAHISGLVAAQEAANPFEYCDVVTTTTHKSLRGPRAGMIFYRKGPKPPKKGQPEGAVYDYEDKINFAVFPSLQGGPHNHQIAALAVALQQTMTPGFKAYAKQVKANAVAIGKYLMSKGYKMVTDGTENHLVLWDLRPLGLTGNKVEKMCDLCSITLNKNAVFGDSSALAPGGVRIGTPAMTSRGLVEKDFEQIGEFLHQAVTICLNIQKEHGKLLKDFSKGLVNNKDIENLKLEVEKFATSFDMPGFTLDSMKYKE*	256
	LOC_Os12g22030		MAMASHHLAQPPTRAALSSRPTYPLSSHHHSSRLQLPLVSGARRSRLSPAVATSPVAAPAMDAVADWGLTTLEEADPEVYDLVEREKRRQRAGVELIASENFTSLAVMEALGSPLTNKYSEGMPGSRYYGGNEVIDEVEELCRARALAAFHLDPEAWGVNVQPYSGSPANFAAYTGLLQPHERIMGLDLPSGGHLTHGYYTAGGKKISATSIYFESLPYKVSSETGYVDYDKLEEKAMDFRPKLIICGGSAYPRDWDYARFRAIADKCGAMLLCDMAHISGLVAAQEAANPFQYSDVVTTTTHKSLRGPRSGMIFYRKGLKPPKKGQPEGALYDYEDRINFAVFPSLQGGPHNHQIAALAVGLKQTMSPGFKSYIKQVKANAVALGNHLMSKGYKLVTD…	531
Zea mays	GRMZM2G039238		MASHHLASPAAAATSAATVSRALFKHAYTKPSYSLLHAPLLRAVAARPALLSAATAVSTTAAPAAAAMDNVEEWGLRPLAEVDPEVYDLIEREKRRQRAGIELIASENFTSLAVMEALGSPLTNKYSEGMPGARYYGGNEVIDEIEELCRTRALAAFHLDPARWGVNVQPYSGSPANFAAYTGLLQPNDRIMGLDLPSGGHLTHGYYTASGKKISATSIYFQSLPYKVSSDTGYVDYDKLEEKAMDFRPKLIICGGSACPREWDYARFRAIADKCGAMLLCDMAHISGLVAAQEALDPFEFSDVVTTTTHKSLRGPRSGMIFYRKGPKPPKKGQPEGALYDYEDKINFAVFPSLQGGPHNHQIAALAVALKQAMSPGFKAYIQQVKANTVSLGNHLMSK…	538
	GRMZM2G078143		MCTRAHLPSTTAIYPGAPSSLPRPSLRLRLRPRPRPRPLLAATTPVTSSRADAAAMDPVATWGLTPLAGADPEIYDLLEREKRRQRRGIELIASENFTSFAVMEALGSALTNKYSEGMPGARYYGGNDVIDEIENLCRSRALAAFHLDAASWGVNVQPYSGSPANFAAYTALLNPHDRIMGLDLPSGGHLTHGYYTAGGKKISATSIYFESLPYKVSAATGYIDYEKLEEKALDFRPKLIICGGSAYPRDWDYAKLRAVADKVGALLLCDMAHISGLVAAQEAANPFEYCDVVTTTTHKSLRGPRAGMIFYRKGPKPPKKGQPEGAVYDYEDKINFAVFPSLQGGPHNHQIAALAVALQQTMSPGFKAYAKQVKANAVAIGNYLMSKGYKMVTDGTENH…	526
	GRMZM2G135283		MAMATALRKLSANALRRQPLSRITPLYYMASLPATEERSGITWTKQLNAPLEEVDPEIADIIEHEKARQWKGLELIPSENFTSVSVMQAVGSVMTNKYSEGYPGARYYGGNEFIDMAESLCQKRALEAFRLDPAKWGVNVQPLSGSPANFHVYTALLKPHERIMALDLPHGGHLSHGYQTDTKKISATSIFFETMPYRLDESTGLIDYDQLEKSAVLFRPKLIIAGASAYARLYDYDRMRKICNKQKAILLADMAHISGLVAAGVVPSPFDYADVVTTTTHKSLRGPRGAMIFYRKGVKEINKQGKEVMYDFEDKINAAVFPGLQGGPHNHTITGLAVALKQATTPEYRAYQEQVISNCAKFAQSLISKGYELVSGGTDNHLVLVNLKNKGIDGSRVEK…	513
	GRMZM2G171116		MDLSRPASSDLSLGLHSHAHAHARVHAAAAPLRLFDDAKPERLVAGEADAERDDGDGGDQHFSLLGHSLCVKRPRRAVNGGGGGGGETSSCSSTSPALRPAKRQAAGEDSGADLETRRAAVRSWGNQSLAEADPDVHSLMEQELARQVRGIELIASENFVCRAVLDALGSHLTNKYSEGAPGARYYGGNQHIDAIERLCHERALTAFGLDPACWGVNVQPYSCTSANLAVYTGLLQPKDRIMGLEPPSGGHVSHGYYTPSGKKVSGASIFFESMSYKVNPQTGYIDYDKLEERAMDFHPKILICGGSSYPREWDFARMRLVADKCGAVLLCDMAHISGLVAAKLVHCILLNNVHKSNWSTS*	361
	GRMZM2G427836		MRLHGYYTAGGKKISATSIYFESLPYKVSATTGYIDYEKLEEKALDFRPKLIICGGSAYPRDWDYARLRAVADKVGALLLCDMAHISGLVAAQVQHSLITTISINQLVP*	109
	GRMZM2G437487		MAKFTSQEVSALQEGGNELPNILFLPAAKEIYFKHWDLQGPVIDSSDVHRLRNFIKNVYVERRYSDQRIGEHLAQAKGNQDSYGNSNADSSPGVLRSAYVETYEDNHDLKRTKESLSENQNNLDGHPTAILSKLYLDCRRYYIYFGKEAANPFEYCDVVTTTTHKSLRGPRAGMIFYRKGPKPPKKGQPEGAVYDYEDNINFVVFPSLQGGPHNHQIAALAVALQQTMSPGFKAYAKQVKANAVAIGNYLMSKGYKMDLRPLGLTGNKVEKLCDLCLITLNKNAVFGDNSALSPGGVRIVFFAILHLSSKSYTYFIGYGTASELQTSMIETLEAVEIEKQRHHNTRMEALARLARLEVTNGELAKSLAREQWELEVQVDQVAQLREEVELKKLAQDKYR…	461
	GRMZM2G452630		MDLSRPTSSDLSLGLHSHGHAHAHARRHAVAAPLRLFDDAEEPKPERVGAGEADAERDDEDGGDQHFSLLGHSLCVKRPRRAGNGGGGGETSSCSSTSAALRPAKRQATGEGSGADLETRRAAVRAWGNQSLAEADPDVHSLMEQELDRQVRGIELIASENFVCRAVLDALGSHLTNKYSEGAPGARYYGGNQHIDAIERLCHERALTAFGLDPACWGVNVQPYSCTSANLAVYTGLLQPKDRIMGLEPPSGGHVSHGYYTPSGKKVSGASIFFESMSYKVNPQTGYIDYDKLEERAMDFHPKILICGGSSYPREWDFARMRLIADKCGAVLLCDMAHISGLVAAKECRSPFDYCDVVTSTTHKNLRGPRGGIIFFRKGKNLRKRAGSFSQGDENEYDF…	588
Brachypodium distachyon	Bradi1g09300		MAMATALRKLSSNALRGQPLSRLTPLYSMASLPATEERSGVTWPKQLNAPLEEVDPEIADIIELEKARQWKGLELIPSENFTSLSVMQAVGSVMTNKYSEGYPGARYYGGNEYIDMAESLCQKRALEAFNLDPEKWGVNVQPLSGSPANFHVYTALLKPHDRIMALDLPHGGHLSHGYQTDTKKISAVSIFFETMPYRLDESTGLIDYDQMEKSAVLFRPKLIVAGASAYARLYDYDRMRKVCDKQKAILLADMAHISGLVAAGVIPSPFDYADVVTTTTHKSLRGPRGAMIFFRKGVKGTNKQGKEIMYDFEDKINAAVFPGLQGGPHNHTITGLAVALKQATTQEYRAYQEQVMSNCARFAQSLTSKGYDIVSGGTDNHLVLVNLKNKGIDGSRVEK…	514
	Bradi2g56557		MDLSRPESSDLSLGLHPHAHARVHARAAPLRLFNDSDDVKTEGSFGGGDGDEGDDEGGDQHFSLLGHSLCVKRPRRALYGGGGGGGGGGGESSSCSSSSSALRPVKRQAAGERSADLEARRGAVRAWGNQPLAEADPDVHELMERERERQVRGIELIASENFVCRAVLDALGSHLTNKYSEGHPGARYYGGNQHIDAIERLCHERALTAFGLDPACWGVNVQPYSCTSANLAVYTGLLLPKDRIMGLEPPSGGHVSHGYYTPSGKKVSGASIFFESLSYKVNPQNGYIDYDKLEDRAMDFHPKILICGGSSYPREWDFARMRLIADKCGAVLMCDMAHISGLVAAKECRSPFDYCDVVTSTTHKNLRGPRGGIIFFRKGKNLRKRTGSFSQGDDNDYDF…	586
	Bradi4g08097		MAMTAQPPMGRAALYSHQTTAALPPKHHPSPLRPPLLRAAARPVRLYAAVATDAASATTAAAAMDAVADWGLTSLEDADPEVYDLIEREKRRQRTGIELIASENFTSLAVMEALGSPLTNKYSEGMPGARYYGGNEVIDEVEELCRARALEAFHLDPASWGVNVQPYSGSPANFAAYTGLLQPHDRIMGLDLPSGGHLTHGYYTAGGKKISATSIYFESLPYKVSSDSGYVDYDRLDEKSMDFRPKLIICGGSAYPREWDYARLRAIADKCGAMLLTDMAHISGLVAAQEAKNPFVYSDVVTTTTHKSLRGPRSGMIFYRKGPKPPKKGQPEGALYDYEDRINFAVFPSLQGGPHNHQIAALAVGLKQTMSPGFKAYIQQVKANAVAIANHLMSKGYKM…	534
	Bradi4g19470		MCTRALLTSIAIYPRRSSYPHHSPSPLALQPRRRAISTCYTPAAAMDSVASWGLTPLADADPEIFDLVEREKRRQRSGIELIASENFTSFAVIEALGSALTNKYSEGMPGARYYGGNDVIDEIENLCRDRALAAFRLDAASWGVNVQPYSGSPANFAAYTALLNPHDRIMGLDLPSGGHLTHGYYTAGGKKISATSIYFESLPYKVSAANGYIDYDKLEEKAMDFRPKLIICGGSAYPRDWDYARLRAVADKVGAMLLCDMAHISGLVAAQEAANPFEFCDVVTTTTHKSLRGPRAGMIFYRKGPKPAKKGQPEGAVYDYEDKINFAVFPSLQGGPHNHQIAALAVALKQAVTPGFKAYAKQVKANAVATGNYLMSKGYKMVTDGTENHLVLWDLRPLG…	516
Sorghum bicolor	Sobic.001G097100		MAMATALRKLSANALRRQPLSRMTPLHYMASLPATEERSGITWPKQLNAPLEEVDPEIFDIIEHEKARQWKGLELIPSENFTSVSVMQAVGSVMTNKYSEGYPGARYYGGNEFIDMAESLCQKRALEAFRLDPAKWGVNVQPLSGSPANFQVYTALLKPHERIMALDLPHGGHLSHGYQTDTKKISATSIFFETMPYRLDESTGLIDYDQLEKSAILFRPKLIVAGASAYARLYDYDRMRKICNKQKAVLLADMAHISGLVAAGVIPSPFDYADVVTTTTHKSLRGPRGAMIFYRKGLKEINKQGKEVMYDFEDKINAAVFPGLQGGPHNHTITGLAVALKQATTPEYRAYQEQVITNCAKFAQSLTAKGYELVSGGTDNHLVLVNLKNKGIDGSRVEK…	513
	Sobic.003G373600		MDLSRPASSDLSLGLHSHGHARGHAHAARVHAVAAPLRLFDGAEDAKPERVVAGEADAERDDEDGGDQHFSLLGHSLCVKRPRRVVNGGGCGGGDTSSCSSTSAALRPAKRQATGEGSGADLETRRAAVRAWGNQSLAEADPAVHALMEQELDRQVRGIELIASENFVCRAVLDALGSHLTNKYSEGAPGARYYGGNQHIDAIERLCHERALIAFGLDPACWGVNVQPYSCTSANLAVYTGLLQPKDRIMGLEPPSGGHVSHGYYTPSGKKVSGASIFFESMSYKVNPQTGYIDYDKLEERAMDFHPKILICGGSSYPREWDFARMRLIADKCGAVLLCDMAHISGLVAAKECRSPFDYCDVVTSTTHKNLRGPRGGIIFFRKGKNLRKRAGSFSQGDD…	593
	Sobic.005G113300		MDPVATWGLTPLAGADPEIYDLLEREKRRQRRGIELIASENFTSFAVMEALGSPLTNKYSEGMPGARYYGGNDVIDEIENLCRSRALAAFRLDAAFWGVNVQPYSGSPANFAAYTALLNPHDRIMGLDLPSGGHLTHGYYTAGGKKISATSIYFESLPYKVSATTGYIDYEKLEEKALDFRPKLIICGGSAYPRDWDYSRLRAIADKVGALLLCDMAHISGLVAAEEAANPFEYCDVVTTTTHKSLRGPRAGMIFYRKGPKPPKKGQPEGAVYDYEDKINFAVFPSLQGGPHNHQIAALAVALQQTMTPGFKAYAKQVKANAVAIGNYLMSKGYKMVTDGTENHLVLWDLRPLGLTGNKVEKLCDLCHITLNKNAVFGDSSALAPGGVRIGAPAMTSRG…	471
	Sobic.008G144800		MASTHHLTSPAAAAATSATTFSRAALIKHAYARPSCSLLHAPLLRAAPRPALLSSAPAPAAAVSTTAAPAAAADAMDAVEDWGLRPLSEVDPEVYDLIEREKRRQRSGIELIASENFTSLAVMEALGSPLTNKYSEGMPGARYYGGNEVIDEVEELCRARALAAFRLDPERWGVNVQPYSGSPANFAAYTGLLQPHDRIMGLDLPSGGHLTHGYYTAGGKKISATSIYFQSLPYKVSSDTGYVDYDKLEEKAMDFRPKLIICGGSAYPREWDYARLRAIADKCGAMLLCDMAHISGLVAAQEALNPFEYSDVVTTTTHKSLRGPRSGMIFYRKGPKPPKKGQPEGALYDYEDKINFAVFPSLQGGPHNHQIAALAVALKQAMSPGFKAYIQQVKANTVA…	546
Physcomitrella patens	Pp3c1_27990		MAMATALLRLARAQGQQLQRTLQQAPAVATASFRFATSAAAAEDPTSSKAHVTWPKQLNADISEVDPEIVDIIEHEKNRQYKGLELIPSENFTSLSVMQAVGSVMTNKYSEGYPGARYYGGNEYIDMAERLCQKRALAAFRLDPEKWGVNVQSLSGSPANFQVYTALLKPHERIMALDLPHGGHLSHGYQTDTKKISAVSIFFETMPYRLNESTGYIDYDQMEKSATLFRPKLIVAGASAYARHYDYARMRQVCDKQKAILLADMAHISGLVAGGVVPSPFDYADVVTTTTHKSLRGPRGAMIFYRKGLKETTKKGEQVFYDYEDKINASVFPGLQGGPHNHTITGLAVALKQAATPEFKAYQEQVLRNSAHFAKALMGRGYELVSGGTENHLVLVNLK…	523
	Pp3c12_14950		MQVTTRDGNQLFFPGSCGSLGFSHGSQFRTPPAPSPSSAQQSPVVYQTSPLVASEHLQNGIPRALPNHSSSIGNRGAKNQTPFQYHDHKERRRGVRDWGNKPLSDVDPDLYYIMEREKHRQWRGIELIASENFTSLAVFEALGSHLTNKYSEGLPGSRYYKGNEHIDQIESLCCSRALAAFHLDPGKWGVNIQPYSCSSANFAVFTACLQPNDRIMGLDVLGGKKISAASTYFQTLPFKVHPETGLIVYEKMEELALLYLADKIHAFLMCDMAHISGLIAAQECDCPFDYCDVVTSTTHKSLRGPWGGIVFFRKGLKAPGKSGDTASVNLEKEINFAIHPTLQGGPDNNHTAALAVSLKQVCSNEYKEYIQQVKKNAQALAEGLKRRGCKLVTDGTNNH…	519
	Pp3c13_1080		MAAALSSSCSPASRLCGCVSVGSSPGSSKVSHVQLPHSLRSAEVQALGAVNLAPASVYRRRPLVVCASAAAPVSVPEGATRFVDPPLSEIDPDVHAIIECEKRRQFRGLELIASENFTSRAVMEAVGSCLTNKYSEGLPGKRYYGGNEYIDQSERLCQQRALTAFHVDEKEWGVNVQPLSGSPANFAVYTALLQPHDRIMGLDLAHGGHLTHGFMTPKRRVSATSVYFESMPYRLNETTGLVDYDILQQTALLFRPKLIIAGASAYARDFDYPRMRKIADSVGAFLMMDMAHISGLVAAGVLSNPFEYCDVVTTTTHKSLRGPRGGMIFYRKGEVNGIDLENAINNAVFPGLQGGPHNHTIGGLAVCLKQAATPEFKTYQQQVVKNCRALADRLMELGY…	541
	Pp3c13_1100		MAAALSSSCSPASRLCGCVSVGSSPGSSKVSHVQLPHSLRSAEVQALGAVNLAPASVYRRRPLVVCASAAAPVSVPEGATRFVDPPLSEIDPDVHAIIECEKRRQFRGLELIASENFTSRAVMEAVGSCLTNKYSEGLPGKRYYGGNEYIDQSERLCQQRALTAFHVDEKEWGVNVQPLSGSPANFAVYTALLQPHDRIMGLDLAHGGHLTHGFMTPKRRVSATSVYFESMPYRLNETTGLVDYDILQQTALLFRPKLIIAGASAYARDFDYPRMRKIADSVGAFLMMDMAHISGLVAAGVLSNPFEYCDVVTTTTHKSLRGPRGGMIFYRKGEVNGIDLENAINNAVFPGLQGGPHNHTIGGLAVCLKQAATPEFKTYQQQVVKNCRALADRLMELGY…	541
	Pp3c14_9630		MAIATAMRRLARSQSQHLHRALHRTPPAACSGFRFSSNTAVASEYSSSAKSNVTWPKQLNADISEVDPEITDIIEHEKNRQWKGLELIPSENFTSVSVMQAVGSVMTNKYSEGYPGARYYGGNEFIDMAERLCQKRALAAFRLDPEKWGVNVQSLSGSPANFQVYTALLKPHERIMALDLPHGGHLSHGYQTDMKKISAVSIFFETMPYRLDESTGYIDYDTMEKSAVLYRPKLIVAGASAYARHYDYARMRKVCDKQKAILLADMAHISGLVAAGVVPSPFDFADVVTTTTHKSLRGPRGAMIFYRKGLKETNKKGEQIFYDYEDKINAAVFPGLQGGPHNHTIAGLAVALKQAATPEFKAYQEQVLSNSARFAKALMSQGYELVSGGTENHLVLVNL…	524
	Pp3c15_6270		MGEEAVEYKVAEWGNQSLEVADEEIYNLIEHEKVRQCRGIELIASENFTSQAVIEALGSALTNKYSEGLPGARYYGGNEFIDQIENLCKARALKAFHLDSEKWGVNVQPYSGSPANFAVYTALLNPHDRIMGLDLPSGGHLTHGYYTSGGKKISATSIFFESLPYKVNYETGYIDYEKLEEKAMDFRPKMIISGGSAYPRDWDYARLRTIADKVGALLMCDMAHYSGLVAAQEVNQPFDYCDVVTTTTHKSLRGPRAGMIFYRKGPKPAKKGQPEGAVYDYEDKINFSVFPSLQGGPHNHQIAALAVALKQVDTPLFKAYAKQVKANAKAIGEALMKKGYKMVTGGTENHLVLWDLRPLGLTGNKVEKVCELAHITLNKNAVFGDSSALAPGGVRVGAP…	478
	Pp3c4_11810		MDDVEMKPSLSLGFVQMMQQSVQQQMSAGGQVHSTLPALSRGSSLSDAIQVETAMQITSRDSAQLLRHKTGASGGFSPLGSTQGLKRKSSALLSGQFRTPTLPASMAGRNNSASCGQQSQLTYHHSSRGSQPVVHQMSHGAFRAVVSSDHHQNGISKPVLNYPSNMSPRVVVNHNSYQTHDNESRKRAVRDWGNRPLAEVDPDLWKIMEKEKSRQWKGIELVASENFTSLAVFEALGSHLTNKYSEGLPGSRYYKGNEYIDQIESLCISRALAAFHLDNERWGVNVQPYSCSSANFAVYTALLQPNDRIMGLDVLSGGHVSHGYHTQSGKKIPAASIYFQTLPFKVHPETGLIDYDKVEEIALLYRPKILICGGSSYPREWNYSRFRQVADKIGAVLMC…	645
	Pp3c4_20570		MDVGEMKPSLSLGLAQMMQQTAQHQLQMSSTMEQVNNVQPTLSSGSHMSDLSQGETVMQVTTRDGSQILLQGTGGSLGFSPANNSQRVKRKATGALLGRQFRTPSAPSTQMMGGVRSPSPSSGQQSPVIYQTSPRTSQPLMQGPSSGAFHAVVASDHLLQNGIPRPLPNQLSSLGQRGAKNHTPFQYHDHKERRRGVRDWGNKPLSEVDPDLWDIMEREKHRQWRGIELIASENFTSLAVFEALGSHLTNKYSEGLPGSRYYRGNENIDQIESLCCSRALSAFHLDPAKWGVNVQPYSCSSANLAVFTALLQPNDRIMGLDVLSGGHLSHGYQTQGGKKISAASIYFQTLPFKVHPETGLIDYEKMEEIALLYRPKILICGGSSYPREWNYSRFRQVAD…	656
	Pp3c9_13200		MDFRPKMIISGGSAYPRDWDYARLRTIADKVGALLMCDMAYFSGLVAAQEVNQPFDFCDVVTTTTHKSLRGPRAGMIFFRKGPKPARKGQPEGAVYDYEDKINFSVFPSLQGGPHNHQIAALGVALKQVDTPLFKAYAKQVKANAKAIGDALMKKGFKMVTDGTENHLVLWDLRPLGLTGNKVEKVCELAHITLNKNSMFGDSSDLAPGGVRIGAPAMTSRGLKEKDFEKIADFLERAVNITLKVQKERGKLLKEFNRGVENNEEIAVLKKDVEKFSMTFDMPGFDVINLKYGKEWGIDQHRCW*	304
