# Supplementary material for: Overexpression of a serine hydroxymethyltransferase increases biomass production and reduces recalcitrance in the bioenergy crop Populus
Source: Royal Society of Chemistry journal article supplement (doi:10.1039/c8se00471d), 2018-11-02
Supplement: c8se00471d3.xlsx [file c8se00471d3.xlsx]

## Sheet: Summary
		Up-regulated	Down-regulated
	#1/Ctrl	230	253
	#2/Ctrl	467	692

## Sheet: DEGs
GeneID	log2(#1/Ctrl)	FDR(#1/Ctrl)	log2(#2/Ctrl)	FDR(#2/Ctrl)	AtGeneID	AtGeneName	Annotation	TF family
Potri.001G028200	1.485	0.00111563	1.925	0.00214987	AT3G54400.1		Eukaryotic aspartyl protease family protein
Potri.001G041700	0.971	0.0213068	1.529	0.000193866	AT1G79720.1		Eukaryotic aspartyl protease family protein
Potri.001G092200	1.695	1.93244e-05	2.045	6.27043e-05	AT1G64390.1	AtGH9C2,GH9C2	glycosyl hydrolase 9C2
Potri.001G131400	1.032	0.00174748	0.933	0.0291014	AT1G31850.1		S-adenosyl-L-methionine-dependent methyltransferases superfamily protein
Potri.001G133800	1.6	0.000196219	2.046	0.000218335	AT1G32090.1		early-responsive to dehydration stress protein (ERD4)
Potri.001G141700	1.886	1.90691e-06	1.601	0.0112959	AT2G36120.1	DOT1	Glycine-rich protein family
Potri.001G240300	1.234	0.00304876	2.189	8.29228e-08	AT3G55440.1	ATCTIMC,CYTOTPI,TPI	triosephosphate isomerase
Potri.001G240900	1.499	3.63942e-05	1.487	0.00156494	AT2G39700.1	ATEXP4,ATEXPA4,ATHEXP ALPHA 1.6,EXPA4	expansin A4
Potri.001G246400	1.516	1.90691e-06	1.971	3.01893e-08	AT5G59010.1		Protein kinase protein with tetratricopeptide repeat domain
Potri.001G263900	2.604	2.93112e-13	2.187	0.000193866	AT3G08030.1		Protein of unknown function, DUF642
Potri.001G275500	1.308	0.00190914	2.732	2.05808e-11	AT2G26870.1	NPC2	non-specific phospholipase C2
Potri.001G320400	1.032	0.000836814	1.343	0.000114718	AT4G13930.1	SHM4	serine hydroxymethyltransferase 4
Potri.001G374200	1.274	0.00658439	1.629	0.00632761	AT3G58120.1	ATBZIP61,BZIP61	Basic-leucine zipper (bZIP) transcription factor family protein	bZIP
Potri.001G398700	1.261	0.00841972	2.343	7.92843e-07	AT5G53880.1
Potri.001G459500	0.853	0.0350113	1.487	0.000119261	AT4G20800.1		FAD-binding Berberine family protein
Potri.002G070100	1.693	3.94073e-06	2.119	1.28013e-06	AT1G21310.1	ATEXT3,EXT3,RSH	extensin 3
Potri.002G093900	1.131	0.000487825	1.878	1.67818e-09	AT1G78060.1		Glycosyl hydrolase family protein
Potri.002G094000	1.567	1.9745e-07	2.056	9.56029e-10	AT1G78060.1		Glycosyl hydrolase family protein
Potri.002G104600	3.166	1.16399e-19	5.319	6.51911e-35	AT1G09750.1		Eukaryotic aspartyl protease family protein
Potri.002G162400	2.21	3.54426e-11	2.807	5.19867e-09	AT3G61490.1		Pectin lyase-like superfamily protein
Potri.002G171700	1.372	0.0029047	1.737	0.00301888	AT1G01300.1		Eukaryotic aspartyl protease family protein
Potri.003G072700	0.906	0.0266383	0.942	0.0444688	AT1G53840.1	ATPME1,PME1	pectin methylesterase 1
Potri.003G093200	1.422	0.000774314	2.89	6.66318e-10	AT5G46690.1	bHLH071	beta HLH protein 71	bHLH
Potri.004G054600	0.967	0.0188234	1.479	0.000689815	AT4G18550.1		alpha/beta-Hydrolases superfamily protein
Potri.004G064500	1.374	0.00244346	2.522	4.41823e-08	AT1G29670.1		GDSL-like Lipase/Acylhydrolase superfamily protein
Potri.004G114300	1.086	0.0110039	2.501	2.77878e-10	AT5G15780.1		Pollen Ole e 1 allergen and extensin family protein
Potri.004G156000	1.305	3.18356e-05	1.037	0.0189589	AT4G34530.1	CIB1	cryptochrome-interacting basic-helix-loop-helix 1	bHLH
Potri.005G057600	0.887	0.0309326	1.173	0.0026708	AT1G48870.1		Transducin/WD40 repeat-like superfamily protein
Potri.005G112700	1.808	5.27415e-07	2.6	2.41982e-10	AT4G36010.1		Pathogenesis-related thaumatin superfamily protein
Potri.005G144900	1.346	0.00112583	1.378	0.0287692	AT4G37450.1	AGP18,ATAGP18	arabinogalactan protein 18
Potri.006G008500	1.227	0.000306209	1.159	0.0426098	AT3G22142.1		Bifunctional inhibitor/lipid-transfer protein/seed storage 2S albumin superfamily protein
Potri.006G041100	1.292	0.00119516	1.469	0.00505963	AT3G57040.1	ARR9,ATRR4	response regulator 9
Potri.006G044400	2.28	5.74464e-09	3.425	1.60602e-12	AT1G74670.1		Gibberellin-regulated family protein
Potri.006G134500	1.271	0.00355215	1.58	0.00233604	AT4G33220.1	ATPME44,PME44	pectin methylesterase 44
Potri.006G135100	1.166	0.000472394	1.239	0.00170551	AT5G20860.1		Plant invertase/pectin methylesterase inhibitor superfamily
Potri.006G228200	1.431	0.000186038	1.316	0.0226568	AT2G46210.1		Fatty acid/sphingolipid desaturase
Potri.007G023600	1.404	0.000107696	1.652	6.96244e-05	AT2G18300.2		basic helix-loop-helix (bHLH) DNA-binding superfamily protein	bHLH
Potri.008G013500	0.861	0.0360922	1.516	4.68162e-05	AT5G04885.1		Glycosyl hydrolase family protein
Potri.008G084800	1.4	9.14168e-05	1.588	0.000284544	AT3G19820.1	CBB1,DIM,DIM1,DWF1,EVE1	cell elongation protein / DWARF1 / DIMINUTO (DIM)
Potri.008G088300	2.529	1.04088e-14	1.687	0.00525565	AT1G69530.1	AT-EXP1,ATEXP1,ATEXPA1,ATHEXP ALPHA 1.2,EXP1,EXPA1	expansin A1
Potri.008G094200	1.491	0.00127039	2.08	0.000960982	AT1G26560.1	BGLU40	beta glucosidase 40
Potri.008G120000	1.039	0.00172401	1.043	0.0111589	AT1G68560.1	ATXYL1,TRG1,XYL1	alpha-xylosidase 1
Potri.008G128400	1.299	0.00658439	3.006	1.78789e-11	AT1G23000.1		Heavy metal transport/detoxification superfamily protein
Potri.008G152300	0.773	0.0498577	1.201	0.00567398	AT3G04910.1	ATWNK1,WNK1,ZIK4	with no lysine (K) kinase 1
Potri.008G171700	1.035	0.0207042	1.599	0.00530571	AT1G04520.1	PDLP2	plasmodesmata-located protein 2
Potri.008G182200	2.017	1.68287e-08	1.891	0.000235417	AT1G67750.1		Pectate lyase family protein
Potri.009G101400	1.538	2.08528e-05	1.699	0.000299573	AT5G42900.1	COR27	cold regulated gene 27
Potri.009G117300	1.297	4.55246e-05	1.513	0.000383475	AT4G34530.1	CIB1	cryptochrome-interacting basic-helix-loop-helix 1	bHLH
Potri.009G128500	0.83	0.0233625	1.652	4.32756e-07	AT3G61430.1	ATPIP1,PIP1,PIP1;1,PIP1A	plasma membrane intrinsic protein 1A
Potri.010G001200	1.652	7.45638e-05	2.883	1.34942e-09
Potri.010G114300	0.909	0.0381985	1.414	0.00102517	AT1G23000.1		Heavy metal transport/detoxification superfamily protein
Potri.010G125100	1.187	0.00131067	1.798	6.43609e-07	AT1G68520.1		B-box type zinc finger protein with CCT domain	CO-like
Potri.012G127500	1.036	0.0366605	1.683	0.00295975	AT5G62350.1		Plant invertase/pectin methylesterase inhibitor superfamily protein
Potri.013G099500	1.194	0.0108618	2.241	2.8502e-07	AT4G19710.2	AK-HSDH,AK-HSDH II	aspartate kinase-homoserine dehydrogenase ii
Potri.014G023000	1.099	0.00448621	1.362	0.00125754	AT4G34160.1	CYCD3,CYCD3;1	CYCLIN D3;1
Potri.014G029000	0.984	0.011112	2.042	8.50092e-09	AT5G42900.3	COR27	cold regulated gene 27
Potri.014G135100	1.154	0.0295291	1.448	0.0421212	AT2G47930.1	AGP26,ATAGP26	arabinogalactan protein 26
Potri.015G024200	1.619	1.58547e-05	1.842	0.00148507	AT5G24090.1	ATCHIA,CHIA	chitinase A
Potri.015G087800	2.137	5.40533e-11	1.924	0.000290088	AT5G63180.1		Pectin lyase-like superfamily protein
Potri.015G093100	0.967	0.0151132	2.08	3.92537e-10	AT5G14210.1		Leucine-rich repeat protein kinase family protein
Potri.016G015500	1.126	0.00187902	2.341	2.43635e-16	AT3G22142.1		Bifunctional inhibitor/lipid-transfer protein/seed storage 2S albumin superfamily protein
Potri.016G038600	1.091	0.00658439	1.308	0.0057882	AT3G57070.1		Glutaredoxin family protein
Potri.016G117100	1.082	0.00134415	1.51	1.68574e-05	AT5G05600.1		2-oxoglutarate (2OG) and Fe(II)-dependent oxygenase superfamily protein
Potri.016G124700	1.433	6.64425e-07	1.393	4.29629e-05	AT5G01600.1	ATFER1,FER1	ferretin 1
Potri.017G095000	0.943	0.0297586	1.823	2.60218e-06	AT1G74160.1
Potri.017G099100	1.12	0.00127039	0.996	0.0298173	AT5G15650.1	ATRGP2,RGP2	reversibly glycosylated polypeptide 2
Potri.017G112600	1.514	0.00011054	2.071	1.62161e-06	AT5G16030.1
Potri.018G065600	0.993	0.0411714	1.157	0.0446154	AT2G06050.1	DDE1,OPR3	oxophytodienoate-reductase 3
Potri.018G074500	0.871	0.0196485	1.468	0.00149301	AT2G26910.1	ATPDR4,PDR4	pleiotropic drug resistance 4
Potri.018G126000	1.216	0.004207	2.087	8.1355e-06	AT3G22142.1		Bifunctional inhibitor/lipid-transfer protein/seed storage 2S albumin superfamily protein
Potri.019G014900	2.233	1.80231e-14	1.776	0.00424224	AT2G26560.1	PLA IIA,PLA2A,PLP2	phospholipase A 2A
Potri.019G062100	0.866	0.0345448	1.071	0.0387786	AT5G58300.1		Leucine-rich repeat protein kinase family protein
Potri.019G083900	1.015	0.0045075	2.174	2.75745e-11	AT1G22690.1		Gibberellin-regulated family protein
Potri.019G093300	1.182	0.00672233	1.951	2.07649e-05	AT2G20520.1	FLA6	FASCICLIN-like arabinogalactan 6
Potri.T177800	1.14	0.0360922	1.709	0.0162927	AT2G44480.1	BGLU17	beta glucosidase 17
Potri.001G096900	-1.035	0.0124168	-3.306	1.19396e-16	AT4G23690.1		Disease resistance-responsive (dirigent-like protein) family protein
Potri.001G107800	-1.057	0.00446483	-1.303	0.00656527	AT4G11650.1	ATOSM34,OSM34	osmotin 34
Potri.001G131500	-1.082	0.00283221	-2.157	3.10226e-08
Potri.001G231300	-0.854	0.0395921	-2.554	7.42058e-14	AT2G31940.1
Potri.001G237200	-1.334	0.000218895	-3.806	2.62899e-22	AT3G46440.1	UXS5	UDP-XYL synthase 5
Potri.001G258700	-1.274	0.011112	-1.812	0.00548379	AT5G12870.1	ATMYB46,MYB46	myb domain protein 46	MYB
Potri.001G279500	-1.5	1.58547e-05	-2.125	2.3955e-07	AT3G51780.1	ATBAG4,BAG4	BCL-2-associated athanogene 4
Potri.001G344100	-1.209	0.00014011	-1.624	4.29772e-06	AT3G01590.1		Galactose mutarotase-like superfamily protein
Potri.001G370800	-1.217	0.0187221	-1.893	0.00485287	AT5G55950.1		Nucleotide/sugar transporter family protein
Potri.001G371200	-1.698	6.63655e-05	-2.067	0.000388316	AT5G55970.1		RING/U-box superfamily protein
Potri.001G376700	-1.641	7.2948e-05	-3.142	2.94475e-10	AT1G73140.1	TBL31	Plant protein of unknown function (DUF828)
Potri.001G403600	-0.9	0.0233625	-1.013	0.0362358	AT3G15480.1		Protein of unknown function (DUF1218)
Potri.001G448400	-1.379	0.00415777	-2.098	0.00113988	AT2G46770.1	ANAC043,EMB2301,NST1	NAC (No Apical Meristem) domain transcriptional regulator superfamily protein	NAC
Potri.001G449500	-1.097	6.39381e-05	-2.035	6.84188e-14	AT1G32900.1		UDP-Glycosyltransferase superfamily protein
Potri.002G002200	-0.949	0.00779451	-1.822	1.04909e-07	AT1G21000.2		PLATZ transcription factor family protein
Potri.002G022600	-2.416	5.92504e-13	-2.674	7.16554e-09	AT1G75750.1	GASA1	GAST1 protein homolog 1
Potri.002G034400	-0.992	0.0292179	-2.01	1.31805e-05	AT1G75280.1		NmrA-like negative transcriptional regulator family protein
Potri.002G072100	-0.736	0.0244459	-1.427	7.40322e-05	AT1G77120.1	ADH,ADH1,ATADH,ATADH1	alcohol dehydrogenase 1
Potri.002G078600	-1.815	1.54476e-05	-3.305	2.0302e-09	AT1G77330.1		2-oxoglutarate (2OG) and Fe(II)-dependent oxygenase superfamily protein
Potri.002G079000	-1.762	4.55246e-05	-2.276	0.000213388	AT5G20240.1	PI	K-box region and MADS-box transcription factor family protein	MIKC
Potri.002G088600	-0.862	0.0125505	-1.395	0.000290923	AT1G77760.1	GNR1,NIA1,NR1	nitrate reductase 1
Potri.002G101200	-0.988	0.040919	-2.752	2.15802e-09	AT1G72230.1		Cupredoxin superfamily protein
Potri.002G101800	-1.218	0.0190495	-1.924	0.00384863	AT1G72220.1		RING/U-box superfamily protein
Potri.002G140300	-1.026	0.00744962	-1.271	0.00473667	AT2G44670.1		Protein of unknown function (DUF581)
Potri.002G174100	-0.927	0.00528655	-0.924	0.0344648	AT5G53500.1		Transducin/WD40 repeat-like superfamily protein
Potri.002G176800	-1.286	0.00775848	-1.769	0.00509797	AT2G46710.1		Rho GTPase activating protein with PAK-box/P21-Rho-binding domain
Potri.002G180800	-0.829	0.0350113	-0.971	0.0320922	AT1G01060.1	LHY,LHY1	Homeodomain-like superfamily protein	MYB_related
Potri.002G184900	-1.047	0.0287382	-2.035	5.57728e-05	AT3G62020.1	GLP10	germin-like protein 10
Potri.002G196900	-1.256	0.0108776	-2.411	0.000133291	AT4G02090.1
Potri.002G233400	-1.594	0.000384824	-2.664	1.25261e-05	AT5G16490.1	RIC4	ROP-interactive CRIB motif-containing protein 4
Potri.002G251200	-1.278	7.55507e-06	-1.031	0.0139486	AT5G48480.1		Lactoylglutathione lyase / glyoxalase I family protein
Potri.003G005200	-1.187	0.0207469	-1.64	0.0273323	AT5G07010.1	ATST2A,ST2A	sulfotransferase 2A
Potri.003G034700	-0.912	0.0295291	-1.491	0.000841444	AT3G21250.2	ATMRP6,MRP6	multidrug resistance-associated protein 6
Potri.003G035900	-1.119	0.00228696	-0.997	0.0392027	AT3G13730.1	CYP90D1	cytochrome P450, family 90, subfamily D, polypeptide 1
Potri.003G038200	-1.098	0.00160963	-1.206	0.00192312	AT3G13730.1	CYP90D1	cytochrome P450, family 90, subfamily D, polypeptide 1
Potri.003G074700	-1.374	0.000640329	-2.261	2.14438e-06	AT2G35020.1	GlcNAc1pUT2	N-acetylglucosamine-1-phosphate uridylyltransferase 2
Potri.003G114100	-1.326	0.004024	-1.965	0.00423832	AT4G12350.1	AtMYB42,MYB42	myb domain protein 42	MYB
Potri.003G131200	-0.82	0.013458	-1.307	1.95555e-05	AT3G05170.1		Phosphoglycerate mutase family protein
Potri.003G132000	-1.136	0.0213521	-1.876	0.00698835	AT1G63910.1	AtMYB103,MYB103	myb domain protein 103	MYB
Potri.003G138700	-1.384	1.47318e-05	-3.2	6.65991e-20
Potri.003G162000	-1.801	2.87068e-05	-2.854	1.18387e-06	AT1G27440.1	ATGUT1,GUT2,IRX10	Exostosin family protein
Potri.003G162100	-1.433	0.00210965	-2.059	0.00095602	AT1G01630.1		Sec14p-like phosphatidylinositol transfer family protein
Potri.003G164200	-1.456	0.00179696	-2.558	1.99624e-05	AT1G03080.1		kinase interacting (KIP1-like) family protein
Potri.003G183700	-0.835	0.0320571	-1.306	0.000330923	AT1G80920.1	J8	Chaperone DnaJ-domain superfamily protein
Potri.004G020000	-1.215	0.00242848	-2.22	8.0386e-06	AT1G70880.1		Polyketide cyclase/dehydrase and lipid transport superfamily protein
Potri.004G095100	-1.426	0.00141641	-3.671	6.2394e-13	AT1G66810.1		Zinc finger C-x8-C-x5-C-x3-H type family protein	C3H
Potri.004G096000	-0.767	0.0203254	-0.931	0.0198101	AT3G18280.1		Bifunctional inhibitor/lipid-transfer protein/seed storage 2S albumin superfamily protein
Potri.004G096100	-1.143	0.0353627	-2.832	2.66935e-06	AT5G39050.1		HXXXD-type acyl-transferase family protein
Potri.004G123600	-1.335	2.54049e-06	-2.315	1.35298e-14	AT3G29320.1		Glycosyl transferase, family 35
Potri.004G140000	-0.844	0.029392	-1.334	0.0230648
Potri.004G140600	-1.041	0.000487825	-1.099	0.00160379	AT4G34000.1	ABF3,DPBF5	abscisic acid responsive elements-binding factor 3	bZIP
Potri.004G162400	-0.847	0.0123985	-1.167	0.000558752	AT4G38970.1	FBA2	fructose-bisphosphate aldolase 2
Potri.004G226800	-1.316	0.00723857	-2.431	3.07039e-05	AT1G09610.1		Protein of unknown function (DUF579)
Potri.005G097000	-0.912	0.0104043	-1.676	1.18649e-07	AT1G59960.1		NAD(P)-linked oxidoreductase superfamily protein
Potri.005G109600	-1.754	5.13985e-05	-2.509	1.60471e-05	AT3G51325.1		RING/U-box superfamily protein
Potri.005G114700	-1.06	0.0485953	-1.815	0.00248306	AT2G17950.1	PGA6,WUS,WUS1	Homeodomain-like superfamily protein	WOX
Potri.005G185400	-1.112	9.33203e-05	-1.338	0.000127302	AT1G21400.1		Thiamin diphosphate-binding fold (THDP-binding) superfamily protein
Potri.005G199600	-0.849	0.0118194	-0.877	0.0264031	AT1G71790.1		Subunits of heterodimeric actin filament capping protein Capz superfamily
Potri.006G040800	-0.838	0.0196647	-1.066	0.00662257	AT2G41250.1		Haloacid dehalogenase-like hydrolase (HAD) superfamily protein
Potri.006G062200	-1.231	0.00801767	-2.027	0.000207371	AT5G34940.2	AtGUS3,GUS3	glucuronidase 3
Potri.006G068200	-0.993	0.001144	-1.742	3.03038e-06	AT5G20190.1		Tetratricopeptide repeat (TPR)-like superfamily protein
Potri.006G074900	-1.085	0.000653165	-1.862	3.62069e-08	AT5G57150.1		basic helix-loop-helix (bHLH) DNA-binding superfamily protein	bHLH
Potri.006G096900	-1.325	0.00700406	-2.648	1.31197e-05	AT2G38080.1	ATLMCO4,IRX12,LAC4,LMCO4	Laccase/Diphenol oxidase family protein
Potri.006G097100	-1.336	0.0057021	-2.287	0.000378441	AT2G38080.1	ATLMCO4,IRX12,LAC4,LMCO4	Laccase/Diphenol oxidase family protein
Potri.006G128000	-0.982	0.0214712	-1.909	5.80377e-05	AT2G37170.1	PIP2;2,PIP2B	plasma membrane intrinsic protein 2
Potri.006G131000	-1.574	0.000196219	-3.041	5.25617e-09	AT2G37090.1	IRX9	Nucleotide-diphospho-sugar transferases superfamily protein
Potri.006G221800	-0.981	0.00228696	-2.049	7.9853e-08	AT4G38620.1	ATMYB4,MYB4	myb domain protein 4	MYB
Potri.006G226100	-0.953	0.0270729	-1.786	2.85173e-05	AT5G11950.1		Putative lysine decarboxylase family protein
Potri.006G233700	-1.184	0.00873357	-2.094	3.56752e-05	AT5G25950.1		Protein of Unknown Function (DUF239)
Potri.006G245400	-0.932	0.00244346	-1.598	2.75303e-07	AT5G25560.1		CHY-type/CTCHY-type/RING-type Zinc finger protein
Potri.007G007000	-1.269	0.00651082	-4.12	8.06772e-16
Potri.007G015100	-0.841	0.0140805	-1.381	6.33988e-05	AT1G15380.1		Lactoylglutathione lyase / glyoxalase I family protein
Potri.007G067600	-1.147	0.0302038	-2.509	2.4766e-05	AT1G79180.1	ATMYB63,MYB63	myb domain protein 63	MYB
Potri.007G107200	-1.199	0.0203254	-1.482	0.0461073	AT3G18660.2	GUX1,PGSIP1	plant glycogenin-like starch initiation protein 1
Potri.007G121100	-1.453	6.04312e-07	-2.305	1.05473e-12	AT4G15248.1		B-box type zinc finger family protein
Potri.007G134500	-1.185	0.0233738	-2.257	0.000495292	AT1G17950.1	ATMYB52,BW52,MYB52	myb domain protein 52	MYB
Potri.008G006500	-1.222	0.00398396	-2.851	6.22744e-10	AT1G71070.1		Core-2/I-branching beta-1,6-N-acetylglucosaminyltransferase family protein
Potri.008G023800	-0.871	0.011531	-1.143	0.0057716	AT1G66240.1	ATATX1,ATX1	homolog of anti-oxidant 1
Potri.008G030200	-1.468	0.000211639	-1.898	0.000145069	AT3G52790.1		peptidoglycan-binding LysM domain-containing protein
Potri.008G068400	-1.091	0.010187	-1.971	2.85173e-05	AT3G08510.1	ATPLC2,PLC2	phospholipase C 2
Potri.008G069900	-1.229	0.00699459	-1.977	6.16894e-05	AT3G55990.1	ESK1,TBL29	Plant protein of unknown function (DUF828)
Potri.008G084100	-1.435	0.00229837	-2.025	0.00212102	AT1G16290.1
Potri.008G094300	-1.244	0.00658439	-3.077	1.25122e-10	AT3G29360.1		UDP-glucose 6-dehydrogenase family protein
Potri.008G136600	-1.154	0.00120601	-2.607	1.40275e-11	AT1G67980.1	CCOAMT	caffeoyl-CoA 3-O-methyltransferase
Potri.008G159500	-0.907	0.042755	-1.863	7.41445e-06	AT3G55760.1
Potri.008G189400	-1.912	2.93112e-13	-1.72	4.67677e-05	AT1G60470.1	AtGolS4,GolS4	galactinol synthase 4
Potri.008G207700	-1.05	0.00583524	-1.302	0.0107707	AT3G16560.1		Protein phosphatase 2C family protein
Potri.009G006500	-0.848	0.0400773	-1.017	0.0278266	AT2G28110.1	FRA8,IRX7	Exostosin family protein
Potri.009G011100	-1.297	0.00520052	-2.744	2.14342e-07	AT2G28315.1		Nucleotide/sugar transporter family protein
Potri.009G013400	-0.691	0.049667	-0.888	0.0103548	AT5G60600.1	CLB4,CSB3,GCPE,HDS,ISPG	4-hydroxy-3-methylbut-2-enyl diphosphate synthase
Potri.009G044200	-1.005	0.0013083	-1.276	0.000212344	AT2G29670.1		Tetratricopeptide repeat (TPR)-like superfamily protein
Potri.009G053900	-1.082	0.0444581	-3.647	2.60717e-12	AT5G12870.1	ATMYB46,MYB46	myb domain protein 46	MYB
Potri.009G067200	-1.025	0.0348147	-2.095	3.11919e-05	AT5G12250.1	TUB6	beta-6 tubulin
Potri.009G099800	-1.075	0.00131067	-2.096	1.83431e-09	AT4G34050.1	CCoAOMT1	S-adenosyl-L-methionine-dependent methyltransferases superfamily protein
Potri.009G111600	-0.909	0.00194443	-1.133	0.000650472	AT4G34350.1	CLB6,HDR,ISPH	4-hydroxy-3-methylbut-2-enyl diphosphate reductase
Potri.010G067100	-1.545	0.000185718	-2.06	0.000123485	AT2G33385.2	arpc2b	actin-related protein C2B
Potri.010G107500	-0.745	0.0400773	-0.981	0.0203368	AT1G03400.1		2-oxoglutarate (2OG) and Fe(II)-dependent oxygenase superfamily protein
Potri.010G132100	-0.822	0.0347723	-1.203	0.0432521
Potri.010G132500	-1.124	0.0397845	-2.588	1.05657e-05	AT1G68725.1	AGP19,ATAGP19	arabinogalactan protein 19
Potri.010G156600	-1.129	0.0369226	-1.555	0.042051	AT5G47530.1		Auxin-responsive family protein
Potri.010G187600	-1.516	0.000567572	-2.99	2.66402e-08	AT3G55990.1	ESK1,TBL29	Plant protein of unknown function (DUF828)
Potri.010G207200	-0.906	0.0147525	-2.023	8.37206e-09	AT2G28760.1	UXS6	UDP-XYL synthase 6
Potri.010G224100	-1.559	0.000176768	-2.331	1.27278e-05	AT2G37040.1	ATPAL1,PAL1	PHE ammonia lyase 1
Potri.010G251800	-1.08	0.000673647	-2.094	9.17715e-07	AT3G21150.1	BBX32	B-box 32
Potri.011G002600	-1.179	0.000836814	-2.213	2.69237e-09	AT3G21690.1		MATE efflux family protein
Potri.011G061500	-1.565	2.36655e-06	-2.484	2.97859e-09	AT5G45970.1	ARAC2,ATRAC2,ATROP7,RAC2,ROP7	RAC-like 2
Potri.011G126300	-1.33	0.00503944	-1.712	0.00849723	AT5G54240.1		Protein of unknown function (DUF1223)
Potri.011G166300	-1.374	0.000833656	-1.907	0.000193513	AT3G13275.1
Potri.012G014000	-1.512	1.94835e-07	-2.603	1.15405e-12	AT5G53420.1		CCT motif family protein
Potri.012G142300	-1.472	0.000607176	-2.021	0.000495838	AT5G23870.3		Pectinacetylesterase family protein
Potri.013G102200	-1.21	0.00914168	-2.393	4.16227e-06	AT1G33800.1		Protein of unknown function (DUF579)
Potri.013G156000	-0.766	0.0390911	-0.913	0.0460306	AT5G58380.1	CIPK10,PKS2,SIP1,SNRK3.8	SOS3-interacting protein 1
Potri.014G029900	-1.391	0.00160963	-1.844	0.00139276	AT4G33330.2	GUX2,PGSIP3	plant glycogenin-like starch initiation protein 3
Potri.014G033400	-1.699	7.37343e-05	-2.525	7.32445e-06	AT2G26560.1	PLA IIA,PLA2A,PLP2	phospholipase A 2A
Potri.014G041700	-1.262	0.00294037	-1.355	0.00881532	AT1G75090.1		DNA glycosylase superfamily protein
Potri.014G072000	-0.74	0.0409017	-1.377	2.07649e-05	AT2G45510.1	CYP704A2	cytochrome P450, family 704, subfamily A, polypeptide 2
Potri.014G080900	-1.35	0.00520052	-1.84	0.00828992	AT1G01780.1		GATA type zinc finger transcription factor family protein
Potri.014G094400	-1.37	0.00446483	-2.11	0.0012522	AT2G46300.1		Late embryogenesis abundant (LEA) hydroxyproline-rich glycoprotein family
Potri.014G098700	-1.382	0.00173009	-2.576	5.16011e-07	AT3G61750.1		Cytochrome b561/ferric reductase transmembrane with DOMON related domain
Potri.014G108300	-1.889	7.15077e-06	-2.277	0.000128245	AT2G41610.1
Potri.014G110400	-1.125	0.025187	-1.924	0.000699164	AT3G62020.1	GLP10	germin-like protein 10
Potri.014G113900	-1.15	0.00779451	-2.756	1.91974e-09	AT1G75250.1	ATRL6,RL6,RSM3	RAD-like 6
Potri.014G116800	-1.635	3.0811e-05	-2.033	4.27208e-05	AT2G47180.1	AtGolS1,GolS1	galactinol synthase 1
Potri.014G119900	-1.574	0.000420026	-3.25	5.14521e-09	AT2G47360.1
Potri.014G129000	-1.604	0.000113339	-1.605	0.00585778	AT3G62860.1		alpha/beta-Hydrolases superfamily protein
Potri.014G139900	-1.316	0.00252748	-1.48	0.0139651	AT1G52140.1
Potri.014G147000	-1.222	0.0182602	-2.051	0.00207883	AT5G16490.1	RIC4	ROP-interactive CRIB motif-containing protein 4
Potri.015G082700	-1.724	4.25264e-05	-2.788	2.54382e-07	AT1G57560.1	AtMYB50,MYB50	myb domain protein 50	MYB
Potri.016G006200	-1.609	0.000278914	-2.43	0.000102629	AT5G47635.1		Pollen Ole e 1 allergen and extensin family protein
Potri.016G052100	-1.09	0.0485953	-1.505	0.0335865
Potri.016G086400	-1.581	5.42874e-05	-3.326	5.85261e-13	AT2G37090.1	IRX9	Nucleotide-diphospho-sugar transferases superfamily protein
Potri.016G119100	-1.632	6.41209e-05	-3.676	3.07221e-14	AT5G01360.1	TBL3	Plant protein of unknown function (DUF828)
Potri.016G125500	-1.541	0.000242691	-1.572	0.00783865	AT2G38320.1	TBL34	TRICHOME BIREFRINGENCE-LIKE 34
Potri.017G041700	-1.302	9.46487e-07	-2.232	1.70201e-11	AT3G25810.1		Terpenoid cyclases/Protein prenyltransferases superfamily protein
Potri.017G051100	-1.611	4.21611e-07	-3.123	6.77178e-13	AT1G70840.1	MLP31	MLP-like protein 31
Potri.017G119900	-1.09	0.0491156	-3.422	4.21014e-10	AT1G66810.1		Zinc finger C-x8-C-x5-C-x3-H type family protein	C3H
Potri.018G031600	-1.267	0.00742584	-2.326	2.9834e-05	AT2G25600.1	AKT6,SPIK	Shaker pollen inward K+ channel
Potri.018G052500	-1.166	0.0212989	-2.111	0.000286421	AT5G11890.1
Potri.018G130100	-1.144	0.000171636	-1.39	0.000972344	AT1G80130.1		Tetratricopeptide repeat (TPR)-like superfamily protein
Potri.018G130300	-1.838	1.36279e-07	-2.682	1.28985e-09	AT1G80130.1		Tetratricopeptide repeat (TPR)-like superfamily protein
Potri.019G002100	-1.217	0.0182602	-1.947	0.00244336	AT2G03200.1		Eukaryotic aspartyl protease family protein
Potri.019G053300	-1.669	4.21569e-05	-1.603	0.00545864	AT5G16490.1	RIC4	ROP-interactive CRIB motif-containing protein 4
Potri.019G076300	-0.876	0.0434446	-2.229	8.89374e-08	AT1G33800.1		Protein of unknown function (DUF579)
Potri.019G128600	-1.014	0.00503944	-1.199	0.0333331	AT5G58350.1	WNK4,ZIK2	with no lysine (K) kinase 4
Potri.T058500	-1.661	2.96668e-05	-1.733	0.0017258	AT5G16490.1	RIC4	ROP-interactive CRIB motif-containing protein 4
Potri.T137300	-1.549	0.000585308	-2.309	9.45401e-05	AT1G15260.1
Potri.001G011000	1.106	0.000819214	0.806	0.195872	AT4G08780.1		Peroxidase superfamily protein
Potri.001G013000	1.215	0.000205891	0.849	0.160667	AT3G49110.1	ATPCA,ATPRX33,PRX33,PRXCA	peroxidase CA
Potri.001G016200	1.172	0.00300813	0.406	0.865617	AT3G20810.1		2-oxoglutarate (2OG) and Fe(II)-dependent oxygenase superfamily protein
Potri.001G071000	1.263	0.000176768	0.777	0.300591	AT5G13870.1	EXGT-A4,XTH5	xyloglucan endotransglucosylase/hydrolase 5
Potri.001G076600	1.093	0.0286361	0.501	0.828138
Potri.001G078000	1.206	0.0177675	-0.309	0.934386
Potri.001G107600	0.822	0.0294217	0.151	0.978215	AT4G11650.1	ATOSM34,OSM34	osmotin 34
Potri.001G121400	1.634	1.479e-06	0.977	0.145326	AT4G22570.1	APT3	adenine phosphoribosyl transferase 3
Potri.001G161600	0.997	0.00443292	0.777	0.201391	AT1G53730.1	SRF6	STRUBBELIG-receptor family 6
Potri.001G167900	1.081	0.0264606	-0.295	0.936624	AT5G07990.1	CYP75B1,D501,TT7	Cytochrome P450 superfamily protein
Potri.001G311300	1.374	4.08818e-07	0.109	0.978462	AT1G17840.1	ABCG11,ATWBC11,COF1,DSO,WBC11	white-brown complex homolog protein 11
Potri.001G410800	1.306	0.00847691	0.705	0.671826	AT4G27290.1		S-locus lectin protein kinase family protein
Potri.001G435400	1.118	0.00417427	0.085	0.987476	AT3G20340.1
Potri.001G451900	1.69	8.45251e-05	-0.107	0.988926	AT4G10490.1		2-oxoglutarate (2OG) and Fe(II)-dependent oxygenase superfamily protein
Potri.001G456900	1.317	0.00520052	0.736	0.548973
Potri.001G462600	1.053	0.000720412	0.653	0.418418	AT1G01980.1	ATSEC1A,SEC1A	FAD-binding Berberine family protein
Potri.002G018300	1.06	0.0177762	0.085	0.990553	AT4G39330.1	ATCAD9,CAD9	cinnamyl alcohol dehydrogenase 9
Potri.002G040700	1.843	1.58547e-05	0.951	0.419341	AT1G06650.2		2-oxoglutarate (2OG) and Fe(II)-dependent oxygenase superfamily protein
Potri.002G075800	0.927	0.0396486	0.721	0.308118	AT2G34300.1		S-adenosyl-L-methionine-dependent methyltransferases superfamily protein
Potri.002G124500	0.937	0.011112	0.877	0.0785254	AT5G67090.1		Subtilisin-like serine endopeptidase family protein
Potri.002G150600	1.133	0.0340812	0.695	0.645879	AT1G08500.1	AtENODL18,ENODL18	early nodulin-like protein 18
Potri.002G156600	0.891	0.0377091	0.829	0.20463	AT3G61220.1		NAD(P)-binding Rossmann-fold superfamily protein
Potri.002G187400	1.379	0.00311549	0.042	0.996218	AT1G02520.1	PGP11	P-glycoprotein 11
Potri.002G190800	1.191	0.0135421	-0.427	0.869897	AT1G02450.1	NIMIN-1,NIMIN1	NIM1-interacting 1
Potri.003G050900	0.939	0.0110039	0.564	0.527553	AT3G16240.1	AQP1,ATTIP2;1,DELTA-TIP,DELTA-TIP1,TIP2;1	delta tonoplast integral protein
Potri.003G061100	1.899	8.73584e-07	-0.86	0.459186	AT1G51915.1		cryptdin protein-related
Potri.003G077500	1.283	0.001124	0.243	0.946464	AT4G16650.1		O-fucosyltransferase family protein
Potri.003G106100	1.427	0.00128817	-0.516	0.832534	AT5G47650.1	ATNUDT2,ATNUDX2,NUDT2	nudix hydrolase homolog 2
Potri.003G106400	1.16	0.00503944	0.672	0.481307	AT1G31650.1	ATROPGEF14,ROPGEF14	RHO guanyl-nucleotide exchange factor 14
Potri.003G108300	1.301	0.00894532	-0.436	NA
Potri.003G139600	0.898	0.0244459	0.421	0.7834	AT1G64390.1	AtGH9C2,GH9C2	glycosyl hydrolase 9C2
Potri.003G141200	1.09	0.0202951	0.505	0.771734	AT1G64450.1		Glycine-rich protein family
Potri.003G149700	1.18	0.0207953	-0.091	0.990553	AT2G43000.1	anac042,NAC042	NAC domain containing protein 42	NAC
Potri.003G154000	0.941	0.0197931	0.925	0.256815
Potri.004G019000	1.335	0.000110275	0.37	0.888977	AT1G11600.1	CYP77B1	cytochrome P450, family 77, subfamily B, polypeptide 1
Potri.004G025200	1.177	0.000292225	0.806	0.121309	AT4G23180.1	CRK10,RLK4	cysteine-rich RLK (RECEPTOR-like protein kinase) 10
Potri.004G026100	1.393	8.98454e-06	0.788	0.205776	AT4G23180.1	CRK10,RLK4	cysteine-rich RLK (RECEPTOR-like protein kinase) 10
Potri.004G026200	0.937	0.0395921	-0.14	0.976012	AT4G05200.1	CRK25	cysteine-rich RLK (RECEPTOR-like protein kinase) 25
Potri.004G026400	1.194	0.00304876	0.515	0.686448	AT4G23180.1	CRK10,RLK4	cysteine-rich RLK (RECEPTOR-like protein kinase) 10
Potri.004G033600	0.916	0.00741559	0.724	0.145349	AT1G11260.1	ATSTP1,STP1	sugar transporter 1
Potri.004G037900	1.829	1.95085e-05	0.809	0.560039	AT1G61120.1	GES,TPS04,TPS4	terpene synthase 04
Potri.004G048300	1.024	0.0107165	0.561	0.551827	AT1G28400.1
Potri.004G068100	1.056	0.00945278	-0.098	0.983841	AT5G23350.1		GRAM domain-containing protein / ABA-responsive protein-related
Potri.004G084000	0.967	0.0105072	0.975	0.0909717	AT1G66150.1	TMK1	transmembrane kinase 1
Potri.004G086500	1.6	2.87068e-05	-0.548	0.724936	AT2G38540.1	ATLTP1,LP1,LTP1	lipid transfer protein 1
Potri.004G117800	0.762	0.0309326	0.223	0.914987	AT5G15650.1	ATRGP2,RGP2	reversibly glycosylated polypeptide 2
Potri.004G155900	1.105	0.00827338	0.43	0.866208	AT1G75250.1	ATRL6,RL6,RSM3	RAD-like 6
Potri.004G164400	1.207	0.0197931	0.188	0.976012	AT4G34760.1		SAUR-like auxin-responsive protein family
Potri.004G179300	1.086	0.0493757	-0.015	0.998381	AT1G05680.1	UGT74E2	Uridine diphosphate glycosyltransferase 74E2
Potri.004G216100	1.857	4.5951e-06	1.252	0.101791	AT5G22930.1		Protein of unknown function (DUF1635)
Potri.004G233100	1.126	0.0172643	0.509	0.743208	AT4G29330.1	DER1	DERLIN-1
Potri.005G003700	1.587	0.000420026	1.298	0.139105	AT4G08570.1		Heavy metal transport/detoxification superfamily protein
Potri.005G006000	1.616	0.000286107	0.18	NA
Potri.005G016800	1.012	0.0324964	0.732	0.390191	AT1G74190.1	AtRLP15,RLP15	receptor like protein 15
Potri.005G026300	1.074	0.0376448	0.494	0.824079	AT3G05470.1		Actin-binding FH2 (formin homology 2) family protein
Potri.005G078700	0.764	0.0353627	-0.915	0.0769657	AT5G10170.1	ATMIPS3,MIPS3	myo-inositol-1-phosphate synthase 3
Potri.005G120500	1.12	0.0118194	-0.023	0.997992	AT5G66460.1		Glycosyl hydrolase superfamily protein
Potri.005G139100	1.237	0.0115007	1.362	0.0554346	AT5G67070.1	RALFL34	ralf-like 34
Potri.005G190100	1.39	0.00208097	-0.526	0.819645	AT1G76930.1	ATEXT1,ATEXT4,EXT1,EXT4,ORG5	extensin 4
Potri.005G213500	0.832	0.0381985	0.547	0.29378	AT3G51895.1	AST12,SULTR3;1	sulfate transporter 3;1
Potri.005G247700	1.356	0.00312252	0.942	0.380352	AT1G76160.1	sks5	SKU5 similar 5
Potri.005G251900	1.049	0.0233738	-0.437	0.827154	AT1G76360.1		Protein kinase superfamily protein
Potri.006G002500	1.041	0.0264606	1.036	0.0909717	AT3G22640.1	PAP85	cupin family protein
Potri.006G030000	1.219	0.0180211	1.164	0.22313
Potri.006G179300	1.262	0.00421998	-0.1	0.988656	AT2G18660.1	PNP-A	plant natriuretic peptide A
Potri.006G179700	1.115	0.0354766	0.935	0.427413	AT5G54010.1		UDP-Glycosyltransferase superfamily protein
Potri.006G250200	1.244	0.0113488	-0.11	0.988656	AT1G52360.1		Coatomer, beta\' subunit
Potri.006G263600	0.84	0.0482497	-0.094	0.987858	AT4G31800.2	ATWRKY18,WRKY18	WRKY DNA-binding protein 18	WRKY
Potri.007G011600	4.14	3.20409e-35	#VALUE!	NA	AT5G10510.2	AIL6,PLT3	AINTEGUMENTA-like 6	AP2
Potri.007G021300	2.011	8.58479e-07	1.266	0.132089	AT3G11480.1	ATBSMT1,BSMT1	S-adenosyl-L-methionine-dependent methyltransferases superfamily protein
Potri.007G082300	0.998	0.00673311	-0.458	0.678304	AT1G34210.1	ATSERK2,SERK2	somatic embryogenesis receptor-like kinase 2
Potri.007G141400	1.176	0.00503944	0.16	0.971777	AT5G38280.1	PR5K	PR5-like receptor kinase
Potri.008G005200	0.793	0.0274674	-0.429	0.594467	AT1G50430.1	7RED,DWF5,LE,PA,ST7R	Ergosterol biosynthesis ERG4/ERG24 family
Potri.008G009500	0.969	0.00536693	0.196	0.930073	AT1G17745.1	PGDH	D-3-phosphoglycerate dehydrogenase
Potri.008G032500	1.284	0.0104043	1.075	0.275094	AT5G22930.1		Protein of unknown function (DUF1635)
Potri.008G053500	1.149	0.0185769	0.658	0.612174	AT3G55390.1		Uncharacterised protein family (UPF0497)
Potri.009G002200	1.128	0.0381985	1.292	0.0809652	AT5G22860.1		Serine carboxypeptidase S28 family protein
Potri.009G025300	1.007	0.0498577	0.435	0.856707	AT2G31900.1	ATMYO5,ATXIF,XIF	myosin-like protein XIF
Potri.009G033900	1.028	0.00111563	0.893	0.104185	AT2G29090.1	CYP707A2	cytochrome P450, family 707, subfamily A, polypeptide 2
Potri.009G081800	1.347	0.00446483	0.758	0.587165	AT1G09970.1	LRR XI-23,RLK7	Leucine-rich receptor-like protein kinase family protein
Potri.009G116600	0.955	0.0190495	-0.438	0.843472	AT4G39250.1	ATRL1,RL1,RSM2	RAD-like 1	MYB_related
Potri.009G121200	0.969	0.00658439	-0.045	0.992671	AT2G16430.2	ATPAP10,PAP10	purple acid phosphatase 10
Potri.009G148100	1.707	7.45638e-05	-0.087	0.991102	AT5G22580.1		Stress responsive A/B Barrel Domain
Potri.009G148900	1.007	0.0260346	0.867	0.138818	AT3G44735.1	ATPSK3,PSK1,PSK3	PHYTOSULFOKINE 3 PRECURSOR
Potri.010G004400	1.155	0.0110515	0.16	0.978267	AT5G26670.1		Pectinacetylesterase family protein
Potri.010G059900	1.653	2.28132e-05	0.214	0.9655	AT1G60420.1		DC1 domain-containing protein
Potri.010G125900	1.881	1.479e-06	-0.527	0.820093	AT3G25882.1	NIMIN-2	NIM1-interacting 2
Potri.010G167200	2.496	1.50034e-14	0.578	0.777254	AT1G69530.1	AT-EXP1,ATEXP1,ATEXPA1,ATHEXP ALPHA 1.2,EXP1,EXPA1	expansin A1
Potri.010G175300	1.251	0.00433161	0.592	0.714326	AT5G44680.1		DNA glycosylase superfamily protein
Potri.010G229000	1.179	0.00727299	1.079	0.171447	AT5G04310.1		Pectin lyase-like superfamily protein
Potri.011G004100	0.99	0.0286361	0.613	0.695985	AT4G04630.1		Protein of unknown function, DUF584
Potri.011G004200	1.188	0.0237863	0.755	0.595543	AT1G05170.2		Galactosyltransferase family protein
Potri.011G031800	3.23	1.28294e-23	0.822	0.510925	AT3G25820.1	ATTPS-CIN,TPS-CIN	terpene synthase-like sequence-1,8-cineole
Potri.011G040500	1.302	0.00640014	0.62	NA	AT4G03270.1	CYCD6;1	Cyclin D6;1
Potri.011G089700	1.097	0.0212989	0.686	0.566997	AT5G55050.1		GDSL-like Lipase/Acylhydrolase superfamily protein
Potri.011G092500	0.855	0.039166	0.774	0.143933	AT5G55230.1	ATMAP65-1,MAP65-1	microtubule-associated proteins 65-1
Potri.011G167000	0.805	0.0177762	0.628	0.263977	AT5G23810.1	AAP7	amino acid permease 7
Potri.012G012300	1.111	0.042071	0.296	0.940208
Potri.012G014500	0.823	0.0332034	0.536	0.525194	AT3G49220.1		Plant invertase/pectin methylesterase inhibitor superfamily
Potri.012G090500	0.981	0.00435533	-0.473	0.77725	AT2G31880.1	EVR,SOBIR1	Leucine-rich repeat protein kinase family protein
Potri.012G103700	1.122	0.0202518	-0.361	0.908838	AT3G48770.1		DNA binding;ATP binding
Potri.012G117300	1.163	0.00813166	0.672	0.468581	AT5G45160.1		Root hair defective 3 GTP-binding protein (RHD3)
Potri.013G045400	1.488	0.00128713	0.806	0.566997
Potri.013G118700	1.152	0.00398396	-1.381	0.0909717	AT5G17050.1	UGT78D2	UDP-glucosyl transferase 78D2
Potri.013G125300	1.568	0.00023695	-1.121	0.257029	AT3G25180.1	CYP82G1	cytochrome P450, family 82, subfamily G, polypeptide 1
Potri.014G014000	1.239	0.0159812	-0.556	NA	AT3G49780.1	ATPSK3 (FORMER SYMBOL),ATPSK4,PSK4	phytosulfokine 4 precursor
Potri.014G026500	1.116	0.0214712	0.962	0.251103	AT5G67090.1		Subtilisin-like serine endopeptidase family protein
Potri.014G038300	1.25	0.00244307	0.712	0.458885	AT3G13690.1		Protein kinase protein with adenine nucleotide alpha hydrolases-like domain
Potri.014G050500	0.9	0.0476459	-0.916	0.243948	AT1G34050.1		Ankyrin repeat family protein
Potri.014G071700	1.131	0.0190495	1.328	0.0547966	AT3G60900.1	FLA10	FASCICLIN-like arabinogalactan-protein 10
Potri.014G084800	1.332	0.00141366	0.627	0.64763	AT1G01690.1	ATPRD3,PRD3	putative recombination initiation defects 3
Potri.014G094800	1.193	0.0159812	0.536	0.792287	AT3G61640.1	AGP20,AtAGP20	arabinogalactan protein 20
Potri.014G135500	1.039	0.00498226	-0.41	0.789951	AT3G06350.1	EMB3004,MEE32	dehydroquinate dehydratase, putative / shikimate dehydrogenase, putative
Potri.014G136600	0.995	0.0233867	0.687	0.447159	AT2G48020.1		Major facilitator superfamily protein
Potri.015G067700	1.062	0.0257007	-0.288	0.924807	AT3G28470.1	ATMYB35,TDF1	Duplicated homeodomain-like superfamily protein	MYB
Potri.015G080800	1.35	0.00446483	0.674	0.678282	AT5G56040.2		Leucine-rich receptor-like protein kinase family protein
Potri.015G147500	0.826	0.0377198	0.414	0.768811	AT5G52470.1	ATFBR1,ATFIB1,FBR1,FIB1,SKIP7	fibrillarin 1
Potri.016G029600	0.976	0.0123323	0.395	0.832649	AT3G56880.1		VQ motif-containing protein
Potri.016G031300	1.1	0.021946	0.511	0.786098	AT5G65600.1		Concanavalin A-like lectin protein kinase family protein
Potri.016G036100	0.926	0.0463051	0.325	0.892187	AT1G80270.1	PPR596	PENTATRICOPEPTIDE REPEAT 596
Potri.016G038000	0.92	0.0254393	-0.085	0.989228	AT3G57040.1	ARR9,ATRR4	response regulator 9
Potri.016G071900	0.975	0.0233738	0.804	0.189499	AT3G52500.1		Eukaryotic aspartyl protease family protein
Potri.016G080400	0.953	0.0311321	0.257	0.93448	AT2G37390.1		Chloroplast-targeted copper chaperone protein
Potri.016G120100	0.774	0.0332034	0.244	0.856132	AT4G33070.1		Thiamine pyrophosphate dependent pyruvate decarboxylase family protein
Potri.016G132700	2.004	5.40533e-11	0.523	0.720164	AT5G05340.1		Peroxidase superfamily protein
Potri.017G016600	0.933	0.0353627	0.038	0.996175	AT1G28440.1	HSL1	HAESA-like 1
Potri.017G020000	0.898	0.0376448	0.599	0.51503	AT3G59540.1		Ribosomal L38e protein family
Potri.017G080200	0.974	0.0104043	-0.535	0.589011	AT3G47800.1		Galactose mutarotase-like superfamily protein
Potri.017G081300	1.261	0.011531	1.191	0.168034	AT3G28857.1		basic helix-loop-helix (bHLH) DNA-binding family protein	bHLH
Potri.017G111000	1.309	0.000384824	-0.491	0.779975
Potri.017G126200	0.808	0.0203254	0.747	0.285538	AT5G37770.1	CML24,TCH2	EF hand calcium-binding protein family
Potri.017G138800	2.648	2.80107e-20	-0.677	0.601821	AT5G17220.1	ATGSTF12,GST26,GSTF12,TT19	glutathione S-transferase phi 12
Potri.018G009300	1.257	0.00520052	0.992	0.22964	AT4G31590.1	ATCSLC05,ATCSLC5,CSLC05,CSLC5	Cellulose-synthase-like C5
Potri.018G019700	1.007	0.0250085	-0.28	0.929864	AT1G80840.1	ATWRKY40,WRKY40	WRKY DNA-binding protein 40	WRKY
Potri.018G045800	0.823	0.0320571	0.211	0.929462	AT5G11650.1		alpha/beta-Hydrolases superfamily protein
Potri.018G053000	1.185	0.00911091	1.158	0.114639	AT2G26110.1		Protein of unknown function (DUF761)
Potri.018G149700	1.227	0.0144228	0.865	0.447841	AT3G13080.1	ATMRP3,MRP3	multidrug resistance-associated protein 3
Potri.018G152200	1.282	0.000218895	-0.242	0.92938	AT5G08370.1	AGAL2,AtAGAL2	alpha-galactosidase 2
Potri.019G005300	0.877	0.0233453	0.252	0.890122	AT3G14840.2		Leucine-rich repeat transmembrane protein kinase
Potri.019G016200	1.415	0.000242691	0.141	0.978462	AT1G68040.1		S-adenosyl-L-methionine-dependent methyltransferases superfamily protein
Potri.019G018500	0.888	0.0475009	0.459	0.721738	AT1G08630.1	THA1	threonine aldolase 1
Potri.019G034700	1.21	0.0189763	-0.08	NA	AT4G20970.1		basic helix-loop-helix (bHLH) DNA-binding superfamily protein	bHLH
Potri.019G043600	1.89	4.93305e-08	0.721	0.620002	AT5G17540.1		HXXXD-type acyl-transferase family protein
Potri.019G055200	0.865	0.0182602	-0.264	0.905259	AT1G08450.1	AtCRT3,CRT3,EBS2,PSL1	calreticulin 3
Potri.019G070900	1.717	7.68708e-05	1.149	0.207382	AT5G53390.1		O-acyltransferase (WSD1-like) family protein
Potri.019G099900	1.106	0.0297586	0.582	0.723271	AT4G17980.1	anac071,NAC071	NAC domain containing protein 71	NAC
Potri.019G130600	1.188	0.0233867	-0.484	0.85493	AT1G78340.1	ATGSTU22,GSTU22	glutathione S-transferase TAU 22
Potri.T033000	0.912	0.0332122	-0.315	0.863219	AT1G29720.1		Leucine-rich repeat transmembrane protein kinase
Potri.T051900	0.726	0.0390911	0.337	0.880501	AT2G26560.1	PLA IIA,PLA2A,PLP2	phospholipase A 2A
Potri.T076800	1.108	0.0377091	0.725	0.631154	AT5G53390.1		O-acyltransferase (WSD1-like) family protein
Potri.T128700	0.939	0.0444036	0.557	0.626543	AT4G23180.1	CRK10,RLK4	cysteine-rich RLK (RECEPTOR-like protein kinase) 10
Potri.T139200	1.209	0.0173406	0.371	0.911931	AT1G68040.1		S-adenosyl-L-methionine-dependent methyltransferases superfamily protein
Potri.T162900	1.105	0.00223922	1.157	0.0785254	AT3G22142.1		Bifunctional inhibitor/lipid-transfer protein/seed storage 2S albumin superfamily protein
Potri.T178900	1.529	0.000833656	-0.155	0.979001	AT1G17180.1	ATGSTU25,GSTU25	glutathione S-transferase TAU 25
Potri.001G010000	-0.127	0.999108	1.268	0.0150507	AT3G58060.1		Cation efflux family protein
Potri.001G012200	0.717	0.156851	1.14	0.011728	AT5G13000.1	ATGSL12,gsl12	glucan synthase-like 12
Potri.001G016600	0.41	0.841457	1.286	0.00546718	AT5G12900.1
Potri.001G017500	0.867	0.207073	1.688	0.0051647	AT3G20820.1		Leucine-rich repeat (LRR) family protein
Potri.001G048500	0.349	0.875307	1.249	0.00179101	AT2G25220.1		Protein kinase superfamily protein
Potri.001G052300	0.719	0.231733	1.406	0.0134948	AT4G13710.1		Pectin lyase-like superfamily protein
Potri.001G061800	0.443	0.700296	1.108	0.00989743	AT1G28050.1		B-box type zinc finger protein with CCT domain	CO-like
Potri.001G065800	-0.029	0.999108	1.02	0.00548786	AT5G13260.1
Potri.001G074700	0.483	0.802182	2.035	0.000708364	AT5G44680.1		DNA glycosylase superfamily protein
Potri.001G094800	0.534	0.721506	1.923	0.000135856	AT4G23750.1	CRF2,TMO3	cytokinin response factor 2	ERF
Potri.001G100000	0.378	0.873768	1.55	0.000111255	AT4G23500.1		Pectin lyase-like superfamily protein
Potri.001G106700	0.84	0.231733	1.576	0.00778868	AT1G63300.1		Myosin heavy chain-related protein
Potri.001G111500	0.715	0.129061	1.14	0.00570442	AT1G12570.1		Glucose-methanol-choline (GMC) oxidoreductase family protein
Potri.001G117000	-0.69	0.436688	1.476	0.00632738	AT1G12330.1
Potri.001G120300	0.93	0.0907646	1.618	0.00283865	AT4G12420.1	SKU5	Cupredoxin superfamily protein
Potri.001G120500	0.403	0.650107	0.91	0.0329599	AT4G22590.1		Haloacid dehalogenase-like hydrolase (HAD) superfamily protein
Potri.001G130100	0.661	0.209476	2.666	4.67191e-16	AT3G45900.1		Ribonuclease P protein subunit P38-related
Potri.001G139700	0.318	0.904605	1.259	0.00300696	AT4G25960.1	PGP2	P-glycoprotein 2
Potri.001G141100	0.996	0.0815961	2.244	6.14871e-05	AT5G46690.1	bHLH071	beta HLH protein 71	bHLH
Potri.001G188400	0.589	0.313734	1.182	0.00540109
Potri.001G205400	0.598	0.39974	1.109	0.0210714	AT4G33520.2	HMA6,PAA1	P-type ATP-ase 1
Potri.001G206800	0.685	0.207507	1.181	0.0103032	AT5G64570.1	ATBXL4,XYL4	beta-D-xylosidase 4
Potri.001G213600	0.193	0.999108	1.867	8.66129e-07	AT5G22850.1		Eukaryotic aspartyl protease family protein
Potri.001G219300	0.737	0.0948819	1.776	9.79087e-06	AT5G21105.1		Plant L-ascorbate oxidase
Potri.001G227400	0.567	NA	1.917	0.00568614	AT2G44480.1	BGLU17	beta glucosidase 17
Potri.001G233000	0.227	0.960875	1.25	0.000146019	AT3G13510.1		Protein of Unknown Function (DUF239)
Potri.001G233700	0.365	0.718174	0.866	0.0199057	AT3G45850.1		P-loop containing nucleoside triphosphate hydrolases superfamily protein
Potri.001G245300	0.852	0.179086	1.46	0.00842387	AT1G07420.1	ATSMO2,SMO2-1	sterol 4-alpha-methyl-oxidase 2-1
Potri.001G254100	0.741	0.197046	3.136	1.63738e-09	AT1G74670.1		Gibberellin-regulated family protein
Potri.001G268400	0.519	0.706738	1.968	0.00215981
Potri.001G288000	-0.014	0.999108	0.853	0.0289501	AT2G14520.1		CBS domain-containing protein with a domain of unknown function (DUF21)
Potri.001G292100	0.356	NA	4.259	7.08175e-19	AT4G33800.1
Potri.001G313000	-0.521	0.64997	1.272	0.0044608	AT1G22360.1	AtUGT85A2,UGT85A2	UDP-glucosyl transferase 85A2
Potri.001G326200	0.722	0.367759	2.098	3.18713e-05	AT5G41050.1		Pollen Ole e 1 allergen and extensin family protein
Potri.001G329900	0.622	0.214833	1.844	3.10226e-08	AT1G60550.1	DHNS,ECHID	enoyl-CoA hydratase/isomerase D
Potri.001G347300	0.333	0.950928	2.03	4.01701e-07	AT3G01550.1	ATPPT2,PPT2	phosphoenolpyruvate (pep)/phosphate translocator 2
Potri.001G388900	0.881	0.132929	1.559	0.00690543
Potri.001G403300	-0.18	0.999108	1.952	1.64639e-05	AT5G54190.1	PORA	protochlorophyllide oxidoreductase A
Potri.001G404700	0.049	0.999108	0.9	0.0249463	AT3G15520.1		Cyclophilin-like peptidyl-prolyl cis-trans isomerase family protein
Potri.001G409900	0.268	0.999108	1.755	0.000146274	AT5G54570.1	BGLU41	beta glucosidase 41
Potri.001G459200	0.141	0.999108	1.406	0.0478014	AT1G26420.1		FAD-binding Berberine family protein
Potri.001G467300	0.742	0.217938	1.188	0.0151174	AT5G56040.2		Leucine-rich receptor-like protein kinase family protein
Potri.002G010100	-0.331	0.791914	1.119	0.00138384	AT2G30600.1		BTB/POZ domain-containing protein
Potri.002G020600	-0.072	NA	1.769	0.0138116	AT4G24175.1
Potri.002G020700	-0.301	NA	1.542	0.0468106	AT2G17880.1		Chaperone DnaJ-domain superfamily protein
Potri.002G020800	0.433	0.771192	2.068	0.000213388	AT2G17880.1		Chaperone DnaJ-domain superfamily protein
Potri.002G027000	0.492	0.803318	2.575	1.14929e-06	AT1G75620.1		glyoxal oxidase-related protein
Potri.002G048200	-0.026	0.999108	1.249	0.000674478	AT3G22830.1	AT-HSFA6B,HSFA6B	heat shock transcription factor A6B	HSF
Potri.002G051600	0.23	0.999108	1.405	0.0117351	AT5G28150.1		Plant protein of unknown function (DUF868)
Potri.002G058700	0.655	0.339178	1.401	0.00243587	AT1G06490.1	ATGSL07,atgsl7,gsl07	glucan synthase-like 7
Potri.002G068300	0.367	0.944348	1.316	0.0460306	AT1G43650.1		nodulin MtN21 /EamA-like transporter family protein
Potri.002G068400	0.29	0.947516	1.097	0.0313056	AT1G76890.2	AT-GT2,GT2	Duplicated homeodomain-like superfamily protein	Trihelix
Potri.002G070000	0.151	0.999108	1.061	0.00691222	AT4G38470.1		ACT-like protein tyrosine kinase family protein
Potri.002G083900	0.696	0.257175	1.208	0.00725448	AT1G21830.1
Potri.002G097500	-0.067	0.999108	1.007	0.0365942	AT1G26480.1	GF14 IOTA,GRF12	general regulatory factor 12
Potri.002G098600	0.246	0.999108	1.404	0.0489723	AT4G08950.1	EXO	Phosphate-responsive 1 family protein
Potri.002G100700	0.563	0.353247	1.106	0.00539137
Potri.002G110300	0.358	0.918626	1.257	0.0151174	AT4G24430.1		Rhamnogalacturonate lyase family protein
Potri.002G110600	0.327	0.966196	1.561	0.0223176	AT2G22610.2		Di-glucose binding protein with Kinesin motor domain
Potri.002G118900	-0.274	0.939317	1.41	0.0125403	AT3G03990.1		alpha/beta-Hydrolases superfamily protein
Potri.002G128100	0.209	0.999108	1.163	0.00434546	AT1G47490.1	ATRBP47C,RBP47C	RNA-binding protein 47C
Potri.002G164400	0.033	0.999108	1.454	0.0211958	AT4G01250.1	AtWRKY22,WRKY22	WRKY family transcription factor	WRKY
Potri.002G165000	0.754	0.230795	1.829	0.000610282	AT2G46140.1		Late embryogenesis abundant protein
Potri.002G189300	-0.622	0.183648	1.967	0.000484015	AT2G34430.1	LHB1B1,LHCB1.4	light-harvesting chlorophyll-protein complex II subunit B1
Potri.002G192600	0.051	NA	1.816	0.0102944	AT4G01950.1	ATGPAT3,GPAT3	glycerol-3-phosphate acyltransferase 3
Potri.002G208500	0.156	NA	2.679	9.66034e-06	AT3G62950.1		Thioredoxin superfamily protein
Potri.002G219700	0.049	NA	2.247	0.000542509	AT2G42990.1		GDSL-like Lipase/Acylhydrolase superfamily protein
Potri.002G227700	0.379	NA	1.969	0.00407872
Potri.002G234600	0.872	0.10804	2.018	2.6295e-06	AT3G07880.1	SCN1	Immunoglobulin E-set superfamily protein
Potri.002G249900	0.358	NA	2.703	5.06418e-06	AT4G12970.1	EPFL9,STOMAGEN	stomagen
Potri.002G251000	0.065	0.999108	1.494	0.0224872	AT5G48485.1	DIR1	Bifunctional inhibitor/lipid-transfer protein/seed storage 2S albumin superfamily protein
Potri.002G252200	0.067	NA	2.027	0.00258173	AT4G29020.2		glycine-rich protein
Potri.003G025100	0.975	0.080975	1.312	0.0180448	AT1G07390.3	AtRLP1,RLP1	receptor like protein 1
Potri.003G057400	0.23	NA	3.371	2.94388e-09	AT1G15550.1	ATGA3OX1,GA3OX1,GA4	gibberellin 3-oxidase 1
Potri.003G072800	0.16	0.999108	1.985	1.93351e-07	AT3G14310.1	ATPME3,PME3	pectin methylesterase 3
Potri.003G090300	-0.316	0.934414	1.366	0.00875307	AT1G32540.2	LOL1	lsd one like 1	LSD
Potri.003G099800	0.44	0.863641	1.847	0.00245462	AT1G32090.1		early-responsive to dehydration stress protein (ERD4)
Potri.003G100000	0.587	0.319621	0.937	0.0318645	AT4G19020.1	CMT2	chromomethylase 2
Potri.003G126800	0.575	0.481915	2.206	1.81903e-05	AT5G12250.1	TUB6	beta-6 tubulin
Potri.003G146800	-0.128	0.999108	1.33	0.0162294	AT2G46660.1	CYP78A6	cytochrome P450, family 78, subfamily A, polypeptide 6
Potri.003G156500	0.85	0.230795	1.698	0.00509797	AT5G44680.1		DNA glycosylase superfamily protein
Potri.003G159200	0.326	0.837967	1.166	0.0010068	AT5G47900.1		Protein of unknown function (DUF1624)
Potri.003G163800	-0.643	0.375864	1.354	0.00930313	AT1G28100.1
Potri.003G166200	0.195	0.999108	1.421	0.0105263	AT5G21090.1		Leucine-rich repeat (LRR) family protein
Potri.003G167100	0.725	0.34961	3.507	1.73576e-12	AT5G13140.1		Pollen Ole e 1 allergen and extensin family protein
Potri.003G185100	0.138	0.999108	2.325	8.1355e-06	AT1G79720.1		Eukaryotic aspartyl protease family protein
Potri.003G189100	-0.22	0.999108	1.004	0.0434333	AT5G07010.1	ATST2A,ST2A	sulfotransferase 2A
Potri.003G195500	0.491	0.764097	1.804	0.00631333	AT3G54400.1		Eukaryotic aspartyl protease family protein
Potri.003G205400	0.242	0.999108	2.059	6.30382e-05	AT3G20860.1	ATNEK5,NEK5	NIMA-related kinase 5
Potri.003G215800	0.042	0.999108	1.513	0.00230031	AT1G69770.1	CMT3	chromomethylase 3
Potri.003G218400	0.083	0.999108	1.458	0.0392027	AT2G44130.1		Galactose oxidase/kelch repeat superfamily protein
Potri.004G010100	0.868	NA	1.779	0.0127198	AT4G22010.1	sks4	SKU5 similar 4
Potri.004G031700	-0.126	0.999108	2.046	0.000126327	AT1G11530.1	ATCXXS1,CXXS1	C-terminal cysteine residue is changed to a serine 1
Potri.004G035800	0.237	0.999108	1.565	0.00151081	AT5G54310.1	AGD5,NEV	ARF-GAP domain 5
Potri.004G040600	0.002	0.999655	1.326	0.0420064	AT4G27450.1		Aluminium induced protein with YGL and LRDR motifs
Potri.004G063200	0.074	0.999108	1.121	0.0127413	AT1G29750.2	RKF1	receptor-like kinase in flowers 1
Potri.004G065400	0.136	0.999108	1.667	0.00614342	AT5G46330.1	FLS2	Leucine-rich receptor-like protein kinase family protein
Potri.004G077600	0.644	0.311174	1.256	0.00309185	AT1G65810.1		P-loop containing nucleoside triphosphate hydrolases superfamily protein
Potri.004G102200	0.573	NA	1.56	0.0432521	AT5G16030.1
Potri.004G114400	0.848	0.234157	2.373	1.12453e-05	AT5G15780.1		Pollen Ole e 1 allergen and extensin family protein
Potri.004G122500	0.65	0.464877	1.339	0.0389127	AT1G69390.1	ARC12,ATMINE1,MINE1	homologue of bacterial MinE 1
Potri.004G129000	0.358	0.848438	0.936	0.0466049	AT5G15080.1		Protein kinase superfamily protein
Potri.004G129700	0.325	0.968713	3.277	8.40118e-11	AT3G47800.1		Galactose mutarotase-like superfamily protein
Potri.004G135500	0.367	0.734061	1.01	0.00976794	AT1G07650.1		Leucine-rich repeat transmembrane protein kinase
Potri.004G138200	0.459	0.759349	1.298	0.013933	AT1G72160.1		Sec14p-like phosphatidylinositol transfer family protein
Potri.004G143700	0.761	0.0815231	0.954	0.0467258	AT3G50530.1	CRK	CDPK-related kinase
Potri.004G144800	-0.338	0.947697	1.807	0.00859291	AT1G49560.1		Homeodomain-like superfamily protein	G2-like
Potri.004G160100	0.174	0.999108	0.87	0.0298173	AT2G16430.2	ATPAP10,PAP10	purple acid phosphatase 10
Potri.004G168600	0.7	0.285444	1.525	0.000146989	AT4G38770.1	ATPRP4,PRP4	proline-rich protein 4
Potri.004G180900	0.077	NA	1.785	0.00734506	AT2G41990.1
Potri.004G188200	0.856	0.168265	1.311	0.0380231	AT3G44735.1	ATPSK3,PSK1,PSK3	PHYTOSULFOKINE 3 PRECURSOR
Potri.004G205000	0.26	0.988175	1.051	0.0460584	AT5G42340.1	PUB15	Plant U-Box 15
Potri.004G226900	-0.022	0.999108	1.168	0.0317212	AT1G09600.1		Protein kinase superfamily protein
Potri.004G230900	0.047	0.999108	1.252	0.0387786	AT2G02400.1		NAD(P)-binding Rossmann-fold superfamily protein
Potri.004G231000	0.805	0.285393	2.164	7.17678e-05	AT5G49800.1		Polyketide cyclase/dehydrase and lipid transport superfamily protein
Potri.005G019700	0.823	0.172692	1.324	0.00834054	AT5G26910.1
Potri.005G036600	0.077	0.999108	1.905	3.38519e-06	AT1G54820.1		Protein kinase superfamily protein
Potri.005G059500	0.227	0.999108	1.789	0.00122586	AT5G24550.1	BGLU32	beta glucosidase 32
Potri.005G062700	0.681	0.347141	1.311	0.010028	AT4G16990.2	RLM3	disease resistance protein (TIR-NBS class), putative
Potri.005G072500	0.462	0.648579	1.66	5.1867e-05	AT5G65280.1	GCL1	GCR2-like 1
Potri.005G081200	0.08	0.999108	1.196	0.048228	AT1G15100.1	RHA2A	RING-H2 finger A2A
Potri.005G081400	0.162	NA	1.785	0.0127198	AT5G65207.1
Potri.005G108400	0.425	0.876049	2.257	5.56765e-08	AT1G21740.1		Protein of unknown function (DUF630 and DUF632)
Potri.005G109200	-0.362	0.948026	1.507	0.0447619	AT4G35100.1	PIP2;7,PIP3,PIP3A,SIMIP	plasma membrane intrinsic protein 3
Potri.005G109300	0.568	0.482572	1.139	0.0286611	AT2G16850.1	PIP2;8,PIP3B	plasma membrane intrinsic protein 2;8
Potri.005G112000	0.894	0.0999205	1.258	0.012412	AT4G38620.1	ATMYB4,MYB4	myb domain protein 4	MYB
Potri.005G121900	0.049	0.999108	1.062	0.0251424	AT2G18300.1		basic helix-loop-helix (bHLH) DNA-binding superfamily protein	bHLH
Potri.005G130100	0.207	0.999108	0.997	0.0243815	AT5G66590.1		CAP (Cysteine-rich secretory proteins, Antigen 5, and Pathogenesis-related 1 protein) superfamily protein
Potri.005G134600	-0.341	0.945367	1.402	0.0248836	AT4G37180.1		Homeodomain-like superfamily protein	G2-like
Potri.005G135500	0.453	0.650817	1.038	0.0127198	AT2G15790.1	CYP40,SQN	peptidyl-prolyl cis-trans isomerase / cyclophilin-40 (CYP40) / rotamase
Potri.005G141900	0.528	0.56516	1.063	0.0433511	AT5G67260.1	CYCD3;2	CYCLIN D3;2
Potri.005G145800	-0.106	NA	2.096	0.000355059	AT5G67390.1
Potri.005G156600	-0.047	0.999108	1.192	0.0233544	AT4G33580.1	ATBCA5,BCA5	beta carbonic anhydrase 5
Potri.005G161800	0.248	0.961108	0.962	0.0293085	AT1G22460.1		O-fucosyltransferase family protein
Potri.005G163600	0.052	0.999108	1.518	0.0444688	AT4G08950.1	EXO	Phosphate-responsive 1 family protein
Potri.005G163700	0.543	0.711327	1.713	0.0139486	AT4G08950.1	EXO	Phosphate-responsive 1 family protein
Potri.005G167900	0.745	0.174816	1.047	0.0470572	AT4G08685.1	SAH7	Pollen Ole e 1 allergen and extensin family protein
Potri.005G178100	0.474	0.653303	1.478	0.000484015	AT1G77580.2		Plant protein of unknown function (DUF869)
Potri.005G203500	0.225	0.995283	0.999	0.0388463	AT1G06490.1	ATGSL07,atgsl7,gsl07	glucan synthase-like 7
Potri.005G210200	0.05	0.999108	1.207	0.0397778	AT3G22380.2	TIC	time for coffee
Potri.005G237600	0.865	0.156322	1.645	0.00269063	AT5G06300.1		Putative lysine decarboxylase family protein
Potri.005G241700	0.292	0.902982	0.953	0.0307922	AT1G20080.1	ATSYTB,NTMC2T1.2,NTMC2TYPE1.2,SYT2,SYTB	Calcium-dependent lipid-binding (CaLB domain) family protein
Potri.006G004200	0.886	0.183123	1.598	0.0259799	AT1G55850.1	ATCSLE1,CSLE1	cellulose synthase like E1
Potri.006G019200	0.277	0.960875	1.382	0.0114868	AT4G16380.1		Heavy metal transport/detoxification superfamily protein
Potri.006G021100	0.329	0.874797	1.259	0.0205923	AT3G22210.1
Potri.006G033900	0.894	0.10339	1.456	0.00252614	AT1G68570.1		Major facilitator superfamily protein
Potri.006G034000	0.355	0.883336	1.154	0.00907337	AT1G68570.1		Major facilitator superfamily protein
Potri.006G035400	0.208	0.979156	1.102	0.00585742	AT5G12250.1	TUB6	beta-6 tubulin
Potri.006G046000	0.631	0.432828	1.233	0.0223102	AT5G03960.1	IQD12	IQ-domain 12
Potri.006G052100	0.281	0.97471	1.048	0.0470892	AT2G41830.1		Uncharacterized protein
Potri.006G061400	0.604	0.193741	1.555	0.00192001	AT2G12462.1
Potri.006G064000	-0.185	0.999108	1.24	0.0359007	AT5G33280.1		Voltage-gated chloride channel family protein
Potri.006G065500	0.686	0.172213	2.528	1.40275e-11	AT2G10940.1		Bifunctional inhibitor/lipid-transfer protein/seed storage 2S albumin superfamily protein
Potri.006G071200	0.25	0.999108	1.448	0.0163393	AT4G25810.1	XTH23,XTR6	xyloglucan endotransglycosylase 6
Potri.006G072100	0.491	0.722009	1.162	0.0246853	AT2G17220.1		Protein kinase superfamily protein
Potri.006G076500	0.035	0.999108	1.527	0.0189589	AT1G06980.1
Potri.006G087700	-0.547	0.348453	1.316	0.0245866	AT5G02160.1
Potri.006G099400	-0.249	0.990898	1.056	0.0162927	AT5G01270.2	ATCPL2,CPL2	carboxyl-terminal domain (ctd) phosphatase-like 2
Potri.006G105100	0.252	0.960875	1.358	0.0260536	AT5G01710.1		methyltransferases
Potri.006G112000	0.568	0.553897	1.237	0.0357914	AT5G55040.1		DNA-binding bromodomain-containing protein
Potri.006G121700	0.498	0.409388	1.138	0.0117143	AT2G36830.1	GAMMA-TIP,GAMMA-TIP1,TIP1;1	gamma tonoplast intrinsic protein
Potri.006G126800	0.424	0.617032	1.147	0.00227962	AT2G37040.1	ATPAL1,PAL1	PHE ammonia lyase 1
Potri.006G131100	0.394	0.786806	1.185	0.00384803	AT5G03040.1	iqd2	IQ-domain 2
Potri.006G139100	0.155	NA	1.881	0.00309185	AT5G20710.1	BGAL7	beta-galactosidase 7
Potri.006G142500	-0.202	0.999108	1.256	0.00170551	AT5G45550.1		Mob1/phocein family protein
Potri.006G142600	0.389	0.903852	1.624	0.00505066	AT5G20630.1	ATGER3,GER3,GLP3,GLP3A,GLP3B	germin 3
Potri.006G165500	-0.004	0.999108	1.059	0.0389127	AT5G57340.2
Potri.006G166800	0.447	0.568128	0.98	0.0165355	AT5G45670.1		GDSL-like Lipase/Acylhydrolase superfamily protein
Potri.006G173700	-0.094	0.999108	1.681	0.00210707	AT5G57670.2		Protein kinase superfamily protein
Potri.006G177000	0.726	0.27679	1.793	4.13422e-05	AT4G30410.1		sequence-specific DNA binding transcription factors
Potri.006G205500	0.235	NA	2.73	2.96807e-06	AT5G04820.1	ATOFP13,OFP13	ovate family protein 13
Potri.006G218000	0.673	0.302784	2.221	3.1592e-10	AT2G26250.1	FDH,KCS10	3-ketoacyl-CoA synthase 10
Potri.006G219800	-0.183	0.999108	1.649	0.00834484	AT5G21940.1
Potri.006G233800	0.703	0.172692	1.095	0.0179551	AT2G25930.1	ELF3,PYK20	hydroxyproline-rich glycoprotein family protein
Potri.006G247200	0.509	0.54932	1.174	0.00821818	AT5G25380.1	CYCA2;1	cyclin a2;1
Potri.006G253800	0.789	0.30568	1.757	0.0110971	AT5G25390.2	SHN2	Integrase-type DNA-binding superfamily protein	ERF
Potri.006G259700	-0.106	0.999108	1.327	0.0239045	AT4G32030.1
Potri.007G025600	0.294	0.991212	1.605	0.00350709	AT5G49560.1		Putative methyltransferase family protein
Potri.007G027900	0.14	NA	2.096	0.00170551	AT4G36670.1		Major facilitator superfamily protein
Potri.007G037700	0.595	0.598656	1.274	0.0366949	AT2G23620.1	ATMES1,MES1	methyl esterase 1
Potri.007G044500	0.815	0.0836902	1.727	0.000106995	AT5G67050.1		alpha/beta-Hydrolases superfamily protein
Potri.007G051600	0.737	0.358936	1.905	0.000104802	AT2G23130.1	AGP17,ATAGP17	arabinogalactan protein 17
Potri.007G091100	0.143	0.999108	1.524	0.0250276	AT2G22170.1		Lipase/lipooxygenase, PLAT/LH2 family protein
Potri.007G093200	0.574	0.252959	1.202	0.00570629	AT4G39900.1
Potri.007G103800	-0.462	0.621977	1.791	9.65531e-08	AT5G51810.1	AT2353,ATGA20OX2,GA20OX2	gibberellin 20 oxidase 2
Potri.007G107300	0.875	0.106576	1.288	0.0445678	AT5G09760.1		Plant invertase/pectin methylesterase inhibitor superfamily
Potri.007G134000	0.084	0.999108	1.557	0.0295471	AT4G04885.1	PCFS4	PCF11P-similar protein 4
Potri.007G140700	0.429	0.676829	1.115	0.00309185	AT1G05680.1	UGT74E2	Uridine diphosphate glycosyltransferase 74E2
Potri.008G045500	-0.181	0.999108	1.438	0.0155718
Potri.008G058800	-0.046	0.999108	1.24	0.00842387	AT2G44920.2		Tetratricopeptide repeat (TPR)-like superfamily protein
Potri.008G074500	0.346	0.958656	2.168	3.1785e-06	AT5G34930.1		arogenate dehydrogenase
Potri.008G078800	0.451	0.679329	1.206	0.00860261	AT5G16290.1	VAT1	VALINE-TOLERANT 1
Potri.008G079400	0.363	0.899031	2.032	7.93045e-08	AT1G65590.1	ATHEX1,HEXO3	beta-hexosaminidase 3
Potri.008G081000	1.025	0.0613372	1.593	0.00884495	AT5G44680.1		DNA glycosylase superfamily protein
Potri.008G091700	0.654	0.197029	1.09	0.014687	AT1G69420.1		DHHC-type zinc finger family protein
Potri.008G091900	-0.26	0.999108	1.254	0.0326362	AT1G13960.1	WRKY4	WRKY DNA-binding protein 4	WRKY
Potri.008G100300	0.726	0.401011	1.58	0.0176665	AT3G62270.1		HCO3- transporter family
Potri.008G101500	0.253	0.973887	1.101	0.0206746	AT3G06500.1		Plant neutral invertase family protein
Potri.008G108100	0.172	NA	2.31	0.000317598	AT5G49360.1	ATBXL1,BXL1	beta-xylosidase 1
Potri.008G116900	0.316	NA	1.791	0.0106511	AT1G13250.1	GATL3	galacturonosyltransferase-like 3
Potri.008G118300	0.446	0.842151	1.879	0.00414106	AT1G68640.1	PAN	bZIP transcription factor family protein	bZIP
Potri.008G118600	0.631	0.173013	1.01	0.00725448	AT1G25480.1		Aluminium activated malate transporter family protein
Potri.008G124300	0.751	0.331817	1.7	0.00136962	AT2G01210.1		Leucine-rich repeat protein kinase family protein
Potri.008G144500	0.859	0.111776	1.994	2.62818e-07	AT1G14520.2	MIOX1	myo-inositol oxygenase 1
Potri.008G146100	0.479	0.821152	1.361	0.0364128	AT1G70230.1	TBL27	TRICHOME BIREFRINGENCE-LIKE 27
Potri.008G153300	-0.12	0.999108	1.437	0.000696064	AT4G14880.1	ATCYS-3A,CYTACS1,OASA1,OLD3	O-acetylserine (thiol) lyase (OAS-TL) isoform A1
Potri.008G162000	0.257	0.986159	1.274	0.00336545	AT1G04280.1		P-loop containing nucleoside triphosphate hydrolases superfamily protein
Potri.008G165400	-0.081	0.999108	1.033	0.0491327	AT1G06620.1		2-oxoglutarate (2OG) and Fe(II)-dependent oxygenase superfamily protein
Potri.008G171400	0.147	0.999108	0.964	0.0226961	AT2G33360.1		Protein of unknown function (DUF3527)
Potri.008G186200	0.027	NA	2.293	0.000286489	AT1G67910.1
Potri.008G189200	0.901	0.172514	3.302	6.81931e-14	AT1G60590.1		Pectin lyase-like superfamily protein
Potri.008G190000	0.867	0.0938379	2.591	9.57063e-08	AT1G70370.1	PG2	polygalacturonase 2
Potri.008G200000	0.543	0.675083	1.265	0.0296266	AT5G18970.1		AWPM-19-like family protein
Potri.008G203100	-0.118	0.999108	1.537	0.0290698	AT1G03220.1		Eukaryotic aspartyl protease family protein
Potri.008G204100	0.135	0.999108	2.613	5.44879e-06	AT5G19190.1
Potri.008G214600	0.098	0.999108	1.472	0.00310584	AT5G18600.1		Thioredoxin superfamily protein
Potri.008G214800	0.384	0.926256	1.623	0.00627911	AT5G18600.1		Thioredoxin superfamily protein
Potri.008G220800	0.448	NA	2.024	0.00275831	AT3G06880.2		Transducin/WD40 repeat-like superfamily protein
Potri.009G008200	0.039	0.999108	1.079	0.00881941	AT2G28070.1		ABC-2 type transporter family protein
Potri.009G010700	0.619	0.445816	1.262	0.0115108	AT2G28260.1	ATCNGC15,CNGC15	cyclic nucleotide-gated channel 15
Potri.009G027000	0.467	0.659161	1.138	0.0111589	AT3G55280.1	RPL23AB	ribosomal protein L23AB
Potri.009G035000	0.166	0.999108	1.136	0.0079917	AT3G46640.1	LUX,PCL1	Homeodomain-like superfamily protein	G2-like
Potri.009G055600	0.327	0.930525	1.286	0.00362131	AT3G60910.1		S-adenosyl-L-methionine-dependent methyltransferases superfamily protein
Potri.009G061700	0.548	0.368813	1.035	0.0247074	AT4G26900.1	AT-HF,HISN4	HIS HF
Potri.009G064300	0.978	0.0967767	2.171	7.32445e-06	AT3G20820.1		Leucine-rich repeat (LRR) family protein
Potri.009G072900	-0.133	NA	1.593	0.0357914	AT3G47340.1	ASN1,AT-ASN1,DIN6	glutamine-dependent asparagine synthase 1
Potri.009G073800	-0.135	0.999108	0.998	0.0387786	AT1G07110.1	ATF2KP,F2KP,FKFBP	fructose-2,6-bisphosphatase
Potri.009G087700	0.35	0.891329	1.233	0.00782427	AT4G33860.1		Glycosyl hydrolase family 10 protein
Potri.009G092600	0.45	0.835762	1.419	0.00666193	AT5G59845.1		Gibberellin-regulated family protein
Potri.009G097300	0.103	0.999108	1.401	0.0208849	AT4G35220.1		Cyclase family protein
Potri.009G097800	0.536	0.651566	2.071	1.09859e-07	AT4G34160.1	CYCD3,CYCD3;1	CYCLIN D3;1
Potri.009G098100	0.061	0.999108	1.058	0.0340246	AT1G47128.1	RD21,RD21A	Granulin repeat cysteine protease family protein
Potri.009G108200	-0.37	0.847526	1.268	0.0413031	AT2G15890.1	MEE14	maternal effect embryo arrest 14
Potri.009G116400	0.552	0.357697	1.023	0.0274004	AT4G39260.3	ATGRP8,CCR1,GR-RBP8,GRP8	cold, circadian rhythm, and RNA binding 1
Potri.009G120300	0.291	0.969626	1.388	0.00129048
Potri.009G126700	0.435	NA	1.638	0.0263618	AT4G38840.1		SAUR-like auxin-responsive protein family
Potri.009G129900	0.637	0.224994	1.484	4.29629e-05	AT4G38770.1	ATPRP4,PRP4	proline-rich protein 4
Potri.009G131800	0.065	NA	2.707	7.32445e-06	AT2G17880.1		Chaperone DnaJ-domain superfamily protein
Potri.009G143300	0.396	0.797127	1.202	0.00881941	AT2G17120.1	LYM2	lysm domain GPI-anchored protein 2 precursor
Potri.010G002500	-0.222	0.999108	1.412	0.00720356	AT3G17510.1	CIPK1,SnRK3.16	CBL-interacting protein kinase 1
Potri.010G002900	-0.278	0.924016	1.011	0.0432534	AT5G48960.1		HAD-superfamily hydrolase, subfamily IG, 5\'-nucleotidase
Potri.010G041300	0.402	0.910288	1.532	0.0425114	AT1G23710.1		Protein of unknown function (DUF1645)
Potri.010G042100	0.455	0.846823	3.026	4.90666e-12	AT1G60590.1		Pectin lyase-like superfamily protein
Potri.010G043300	0.818	0.193741	1.208	0.0382155	AT1G60790.1	TBL2	Plant protein of unknown function (DUF828)
Potri.010G055200	0.882	0.193199	1.836	0.000946075	AT3G13080.1	ATMRP3,MRP3	multidrug resistance-associated protein 3
Potri.010G069700	0.067	NA	1.775	0.0133954	AT3G25400.1
Potri.010G073400	0.466	0.664502	0.995	0.0333114	AT4G14420.1		HR-like lesion-inducing protein-related
Potri.010G081300	0.247	0.952574	1.263	0.000106995	AT5G43810.1	AGO10,PNH,ZLL	Stabilizer of iron transporter SufD / Polynucleotidyl transferase
Potri.010G103500	0.104	NA	2.926	9.32339e-07	AT2G01818.1		PLATZ transcription factor family protein
Potri.010G107900	0.654	0.486114	1.378	0.0162927	AT1G70670.1		Caleosin-related family protein
Potri.010G116900	0.616	0.448103	1.307	0.00505043	AT1G15160.1		MATE efflux family protein
Potri.010G128200	0.829	0.23041	1.429	0.0213979	AT1G25510.1		Eukaryotic aspartyl protease family protein
Potri.010G135100	0.009	0.999108	0.818	0.0287692	AT1G26230.1		TCP-1/cpn60 chaperonin family protein
Potri.010G138600	0.11	0.999108	1.121	0.0143602	AT1G69040.2	ACR4	ACT domain repeat 4
Potri.010G150500	0.065	0.999108	1.327	0.0170359	AT3G17210.1	ATHS1,HS1	heat stable protein 1
Potri.010G185200	0.079	0.999108	1.057	0.0162422	AT2G31820.1		Ankyrin repeat family protein
Potri.010G185300	0.582	0.336658	1.185	0.0102944	AT4G18640.1	MRH1	Leucine-rich repeat protein kinase family protein
Potri.010G223400	0.336	0.954569	1.511	0.0408398	AT3G54800.1		Pleckstrin homology (PH) and lipid-binding START domains-containing protein
Potri.010G225200	0.553	0.493755	1.047	0.0426098	AT1G53390.1		P-loop containing nucleoside triphosphate hydrolases superfamily protein
Potri.010G226000	-0.039	0.999108	1.365	0.0226568	AT2G39130.1		Transmembrane amino acid transporter family protein
Potri.010G229300	0.129	0.999108	0.962	0.0250542	AT5G04360.1	ATLDA,ATPU1,LDA,PU1	limit dextrinase
Potri.010G250800	0.821	0.0617475	1.588	0.0051647	AT3G21180.1	ACA9,ATACA9	autoinhibited Ca(2+)-ATPase 9
Potri.010G255400	0.354	0.870162	1.361	0.000708364	AT1G61210.1		Transducin/WD40 repeat-like superfamily protein
Potri.011G042100	0.57	0.551043	1.218	0.0241215	AT1G11260.1	ATSTP1,STP1	sugar transporter 1
Potri.011G049900	-0.372	0.941546	1.591	0.0230648	AT4G27450.1		Aluminium induced protein with YGL and LRDR motifs
Potri.011G050800	0.899	0.132192	1.52	0.00599205	AT4G04930.1	DES-1-LIKE	fatty acid desaturase family protein
Potri.011G071800	0.175	0.999108	1.605	0.0117351	AT1G78700.1	BEH4	BES1/BZR1 homolog 4	BES1
Potri.011G076700	0.157	0.999108	1.602	5.57728e-05	AT5G45650.1		subtilase family protein
Potri.011G117600	-0.201	0.999108	1.449	0.00228737	AT3G14620.1	CYP72A8	cytochrome P450, family 72, subfamily A, polypeptide 8
Potri.011G122400	0.736	0.306859	3.259	8.04068e-13	AT5G54190.1	PORA	protochlorophyllide oxidoreductase A
Potri.011G132900	0.143	0.999108	1.018	0.0151174	AT1G51100.1
Potri.011G136500	0.175	0.999108	1.757	0.000198614	AT4G21780.1
Potri.011G164100	0.032	0.999108	0.844	0.0241272	AT1G30520.1	AAE14	acyl-activating enzyme 14
Potri.011G167300	-0.217	0.991022	1.305	0.0224757	AT5G09220.1	AAP2	amino acid permease 2
Potri.012G017400	0.468	0.840816	1.504	0.0213164	AT5G53486.3
Potri.012G018100	-0.167	0.999108	1.005	0.0434333	AT5G53490.2		Tetratricopeptide repeat (TPR)-like superfamily protein
Potri.012G021500	0.147	0.999108	1.799	0.000131277
Potri.012G022600	0.666	0.144509	1.057	0.00631333	AT5G53660.1	AtGRF7,GRF7	growth-regulating factor 7	GRF
Potri.012G044300	0.319	0.846362	1.21	0.0250276	AT1G18300.1	atnudt4,NUDT4	nudix hydrolase homolog 4
Potri.012G047300	0.451	0.853877	1.377	0.0230648	AT1G48600.2	AtPMEAMT,PMEAMT	S-adenosyl-L-methionine-dependent methyltransferases superfamily protein
Potri.012G047400	0.327	0.872423	1.275	0.00197264	AT1G48600.2	AtPMEAMT,PMEAMT	S-adenosyl-L-methionine-dependent methyltransferases superfamily protein
Potri.012G049000	0.376	0.878504	1.375	0.00293337	AT3G18050.1
Potri.012G049300	0.679	0.458106	1.33	0.0334874	AT3G18080.1	BGLU44	B-S glucosidase 44
Potri.012G075900	0.374	0.810415	0.931	0.0492712	AT5G13690.1	CYL1,NAGLU	alpha-N-acetylglucosaminidase family / NAGLU family
Potri.012G076700	0.27	0.999108	1.449	0.0395323	AT5G14920.1		Gibberellin-regulated family protein
Potri.012G077400	0.446	0.587276	0.972	0.0226507	AT5G62890.1		Xanthine/uracil permease family protein
Potri.012G083000	-0.467	0.600097	1.095	0.0415551	AT1G69040.2	ACR4	ACT domain repeat 4
Potri.012G091700	-0.288	0.996758	1.961	0.000820114	AT4G24790.1		AAA-type ATPase family protein
Potri.012G106500	0.638	0.230744	1.652	2.3944e-05	AT5G13980.1		Glycosyl hydrolase family 38 protein
Potri.012G130400	0.441	0.844952	1.488	0.00416856	AT5G62230.1	ERL1	ERECTA-like 1
Potri.012G131400	0.958	0.109636	2.046	0.00017553	AT2G28100.1	ATFUC1,FUC1	alpha-L-fucosidase 1
Potri.012G143600	0.559	0.531573	1.496	0.00590027	AT4G23430.2		NAD(P)-binding Rossmann-fold superfamily protein
Potri.013G000900	0.767	0.334236	1.352	0.0489482	AT3G05910.1		Pectinacetylesterase family protein
Potri.013G001000	0.343	0.918075	2.27	2.67516e-10	AT1G09540.1	ATMYB61,MYB61	myb domain protein 61	MYB
Potri.013G001600	-0.621	0.268615	1.68	9.0256e-05	AT3G05880.1	RCI2A	Low temperature and salt responsive protein family
Potri.013G011600	0.255	0.970422	1.071	0.0141251	AT1G09160.1		Protein phosphatase 2C family protein
Potri.013G013800	0.4	0.878834	1.596	0.0015518	AT4G15920.1		Nodulin MtN3 family protein
Potri.013G032700	0.805	0.285263	1.748	0.00585996	AT3G04945.1	LCR18	low-molecular-weight cysteine-rich 18
Potri.013G039100	0.294	0.950853	1.24	0.00405455	AT5G28300.1		Duplicated homeodomain-like superfamily protein	Trihelix
Potri.013G060800	0.696	0.393115	3.783	3.21617e-14	AT2G03090.1	ATEXP15,ATEXPA15,ATHEXP ALPHA 1.3,EXP15,EXPA15	expansin A15
Potri.013G086500	0.471	0.793727	1.232	0.042205	AT3G02800.1		Tyrosine phosphatase family protein
Potri.013G091900	0.119	0.999108	0.823	0.0441789	AT3G14172.1
Potri.013G104400	0.121	0.999108	1.071	0.0489189	AT1G58350.1	ZW18	Putative serine esterase family protein
Potri.013G112500	0.656	0.18631	0.955	0.0168115	AT1G35670.1	ATCDPK2,ATCPK11,CDPK2,CPK11	calcium-dependent protein kinase 2
Potri.013G119400	-0.049	0.999108	0.933	0.0255349	AT3G15030.1	MEE35,TCP4	TCP family transcription factor 4	TCP
Potri.013G120600	0.795	0.127793	1.41	0.000473704	AT2G20520.1	FLA6	FASCICLIN-like arabinogalactan 6
Potri.013G128700	-0.057	0.999108	1.045	0.0364324	AT1G21500.1
Potri.013G131100	0.43	0.569915	1.33	5.57728e-05	AT4G03560.1	ATCCH1,ATTPC1,FOU2,TPC1	two-pore channel 1
Potri.013G133300	0.173	0.999108	1.34	0.0248379
Potri.013G141900	0.232	0.960567	0.98	0.0146472	AT1G72610.1	ATGER1,GER1,GLP1	germin-like protein 1
Potri.013G144000	0.117	0.999108	1.196	0.00791472	AT4G03420.1		Protein of unknown function (DUF789)
Potri.013G144200	0.049	NA	1.795	0.0108367	AT2G20870.1		cell wall protein precursor, putative
Potri.013G144300	-0.069	0.999108	1.138	0.00230031	AT4G03400.1	DFL2,GH3-10	Auxin-responsive GH3 family protein
Potri.013G144600	0.207	0.999108	1.277	0.0101274	AT4G03390.1	SRF3	STRUBBELIG-receptor family 3
Potri.013G145600	-0.042	0.999108	1.548	0.0130648	AT2G20830.1		transferases;folic acid binding
Potri.013G152300	0.836	0.222258	1.673	0.0146407	AT3G09280.1
Potri.013G152400	0.132	0.999108	3.357	8.20583e-23	AT4G03210.1	XTH9	xyloglucan endotransglucosylase/hydrolase 9
Potri.013G154100	0.616	0.529179	1.341	0.0282411	AT2G40435.1
Potri.014G014500	0.341	0.959674	1.657	0.00842387	AT1G58420.1		Uncharacterised conserved protein UCP031279
Potri.014G028800	0.174	0.999108	1.402	0.0318533	AT2G29120.1	ATGLR2.7,GLR2.7	glutamate receptor 2.7
Potri.014G034600	0.567	0.296398	1.294	8.48402e-05	AT1G47490.1	ATRBP47C,RBP47C	RNA-binding protein 47C
Potri.014G077400	0.708	0.418217	2.319	7.46251e-05	AT4G00770.1
Potri.014G082100	-0.348	0.883336	1.47	0.00497856	AT2G45850.1		AT hook motif DNA-binding family protein
Potri.014G092200	-0.476	0.535004	1.199	0.0345304	AT2G46220.1		Uncharacterized conserved protein (DUF2358)
Potri.014G092500	0.471	0.582268	1.28	0.000712291	AT4G01210.1		glycosyl transferase family 1 protein
Potri.014G094600	-0.056	0.999108	1.06	0.0432971
Potri.014G106300	-0.009	NA	2.035	0.00264733	AT2G46810.1		basic helix-loop-helix (bHLH) DNA-binding superfamily protein	bHLH
Potri.014G108200	0.252	0.985112	0.964	0.0414209	AT5G54130.2		Calcium-binding endonuclease/exonuclease/phosphatase family
Potri.014G109900	0.408	0.716264	1.32	0.00168693	AT3G62010.1
Potri.014G110800	-0.539	0.722855	1.367	0.0330889	AT3G62040.1		Haloacid dehalogenase-like hydrolase (HAD) superfamily protein
Potri.014G121900	-0.557	0.556581	1.439	0.029469	AT1G02610.1		RING/FYVE/PHD zinc finger superfamily protein
Potri.014G155100	0.366	0.939317	1.416	0.0258199	AT1G62300.1	ATWRKY6,WRKY6	WRKY family transcription factor	WRKY
Potri.014G164600	1.068	0.0623699	2.848	3.55113e-09	AT5G35740.1		Carbohydrate-binding X8 domain superfamily protein
Potri.015G002200	-0.569	0.305989	1.506	0.00842387	AT5G24490.1		30S ribosomal protein, putative
Potri.015G012000	0.474	0.591121	1.17	0.015032	AT5G53020.1		Ribonuclease P protein subunit P38-related
Potri.015G012500	0.274	0.935792	0.917	0.0382686	AT3G49260.1	iqd21	IQ-domain 21
Potri.015G013700	0.737	0.161763	1.301	0.00473667	AT3G49220.1		Plant invertase/pectin methylesterase inhibitor superfamily
Potri.015G040900	0.314	0.971459	1.883	0.00240263	AT3G18050.1
Potri.015G041300	0.446	0.497989	1.002	0.00731027	AT3G18080.1	BGLU44	B-S glucosidase 44
Potri.015G049700	0.788	0.262732	1.511	0.00660106	AT5G61280.1		Remorin family protein
Potri.015G066000	0.126	0.999108	0.848	0.0421064	AT5G62670.1	AHA11,HA11	H(+)-ATPase 11
Potri.015G072600	0.722	0.0840464	1.238	0.00130239	AT5G62890.1		Xanthine/uracil permease family protein
Potri.015G074600	0.284	0.900489	1.562	9.45401e-05	AT5G13700.1	APAO,ATPAO1,PAO1	polyamine oxidase 1
Potri.015G074900	0.097	0.999108	1.061	0.0286052	AT3G47990.1	SIS3	SUGAR-INSENSITIVE 3
Potri.015G079000	-0.192	0.999108	0.971	0.0298094	AT3G48200.1
Potri.015G104500	0.224	0.975575	1.247	0.00246108	AT4G25050.1	ACP4	acyl carrier protein 4
Potri.015G116800	0.67	0.392476	1.808	0.00199862	AT1G25275.1
Potri.015G126900	0.63	0.475456	1.41	0.0114868	AT5G51460.2	ATTPPA	Haloacid dehalogenase-like hydrolase (HAD) superfamily protein
Potri.015G140800	0.728	0.111349	1.662	7.12795e-06
Potri.015G145400	0.202	0.999108	0.977	0.0313002	AT5G23870.3		Pectinacetylesterase family protein
Potri.016G001600	0.722	0.402438	1.803	0.00450129	AT5G64620.1	ATC/VIF2,C/VIF2	cell wall / vacuolar inhibitor of fructosidase 2
Potri.016G006600	0.6	0.449945	1.161	0.0163393	AT5G50740.3		Heavy metal transport/detoxification superfamily protein
Potri.016G119300	0.009	0.999108	1.186	0.0337588	AT2G38280.1	ATAMPD,FAC1	AMP deaminase, putative / myoadenylate deaminase, putative
Potri.016G124900	0.25	0.999108	1.54	0.000553377	AT5G01600.1	ATFER1,FER1	ferretin 1
Potri.016G132600	0.162	0.999108	1.924	0.000106995	AT2G40435.1
Potri.016G141100	0.426	0.716757	0.996	0.0318533	AT3G08600.1		Protein of unknown function (DUF1191)
Potri.017G000700	0.667	0.132838	1.091	0.00842387	AT3G59940.1		Galactose oxidase/kelch repeat superfamily protein
Potri.017G032200	-0.024	0.999108	1.514	0.00157509	AT2G43330.1	ATINT1,INT1	inositol transporter 1
Potri.017G055200	0.326	0.873564	1.66	9.32339e-07	AT1G04880.1		HMG (high mobility group) box protein with ARID/BRIGHT DNA-binding domain
Potri.017G059100	0.717	0.40648	2.571	1.11297e-05	AT3G23820.1	GAE6	UDP-D-glucuronate 4-epimerase 6
Potri.017G067600	0.23	0.991212	1.048	0.0178223	AT4G14605.1		Mitochondrial transcription termination factor family protein
Potri.017G072800	0.042	0.999108	1.024	0.00831182	AT3G01480.1	ATCYP38,CYP38	cyclophilin 38
Potri.017G088600	0.752	0.279423	1.429	0.0135569	AT5G15350.1	AtENODL17,ENODL17	early nodulin-like protein 17
Potri.017G099000	0.768	0.0555764	1.763	4.44882e-06	AT3G30180.1	BR6OX2,CYP85A2	brassinosteroid-6-oxidase 2
Potri.017G112100	0.067	NA	1.725	0.01609	AT1G67265.1	DVL3,RTFL21	ROTUNDIFOLIA like 21
Potri.017G139600	0.814	0.267303	2.419	9.66034e-06	AT1G65920.1		Regulator of chromosome condensation (RCC1) family with FYVE zinc finger domain
Potri.017G146800	0.085	0.999108	0.97	0.0160332	AT5G52660.1		Homeodomain-like superfamily protein	MYB_related
Potri.018G027600	0.021	0.999108	1.187	0.0163533	AT1G30380.1	PSAK	photosystem I subunit K
Potri.018G031100	0.871	0.198269	1.544	0.0396546	AT5G11420.1		Protein of unknown function, DUF642
Potri.018G035700	-0.052	0.999108	1.258	0.00167395	AT1G18950.1		DDT domain superfamily
Potri.018G082600	0.202	NA	1.674	0.023776	AT2G46225.2	ABIL1	ABI-1-like 1
Potri.018G111000	-0.405	0.712833	1.675	0.00212102	AT2G24280.1		alpha/beta-Hydrolases superfamily protein
Potri.018G121500	0.233	0.999108	1.664	0.0170427	AT5G34940.2	AtGUS3,GUS3	glucuronidase 3
Potri.018G127000	0.37	0.723042	1.147	0.0122582
Potri.018G129200	0.708	0.365363	1.382	0.0261734	AT2G32300.1	UCC1	uclacyanin 1
Potri.018G131800	-0.254	0.999108	1.42	0.0178037	AT2G41475.1		Embryo-specific protein 3, (ATS3)
Potri.018G132100	0.78	0.280261	1.83	0.000893009	AT2G06925.1	ATSPLA2-ALPHA,PLA2-ALPHA	Phospholipase A2 family protein
Potri.018G132500	-0.026	0.999108	1.022	0.0282411	AT2G39930.1	ATISA1,ISA1	isoamylase 1
Potri.018G145800	0.611	0.272162	0.996	0.0288861	AT1G30330.2	ARF6	auxin response factor 6	ARF
Potri.018G152400	0.309	0.95637	1.196	0.0288953	AT1G17820.1		Putative integral membrane protein conserved region (DUF2404)
Potri.018G152500	0.143	NA	2.345	0.000235417	AT1G17830.1		Protein of unknown function (DUF789)
Potri.019G024600	0.888	NA	2.497	6.48403e-05	AT5G33370.1		GDSL-like Lipase/Acylhydrolase superfamily protein
Potri.019G024700	0.882	0.0709148	1.407	0.00448649	AT5G33370.1		GDSL-like Lipase/Acylhydrolase superfamily protein
Potri.019G031200	0.913	0.102474	1.767	0.0140856	AT5G18280.2	APY2,ATAPY2	apyrase 2
Potri.019G073100	0.117	NA	1.754	0.0151133	AT1G71530.1		Protein kinase superfamily protein
Potri.019G103900	0.702	0.224994	1.263	0.00289696	AT4G03390.1	SRF3	STRUBBELIG-receptor family 3
Potri.019G104700	-0.064	0.999108	1.804	0.00921221	AT2G20830.1		transferases;folic acid binding
Potri.019G126800	0.591	0.572622	2.748	2.75745e-11	AT2G40435.1
Potri.019G130000	0.58	0.419624	1.301	0.0015582	AT2G40620.1		Basic-leucine zipper (bZIP) transcription factor family protein	bZIP
Potri.019G130100	-0.105	0.999108	2.082	0.000130754	AT5G05280.1		RING/U-box superfamily protein
Potri.T012500	0.292	0.893583	1.878	6.10559e-05	AT5G25610.1	ATRD22,RD22	BURP domain-containing protein
Potri.T081500	0.163	0.999108	2.221	5.57728e-05	AT1G79720.1		Eukaryotic aspartyl protease family protein
Potri.001G031800	-0.849	0.0233867	-0.693	0.200201	AT5G06980.4
Potri.001G043100	-1.029	0.0168668	0.654	0.67583	AT1G80920.1	J8	Chaperone DnaJ-domain superfamily protein
Potri.001G054800	-0.979	0.0184474	-1.382	0.0779878	AT1G74110.1	CYP78A10	cytochrome P450, family 78, subfamily A, polypeptide 10
Potri.001G065400	-1.007	0.00237068	-0.733	0.479945	AT1G58190.2	AtRLP9,RLP9	receptor like protein 9
Potri.001G066400	-1.053	0.00108989	0.733	0.640341	AT3G26740.1	CCL	CCR-like
Potri.001G079600	-1.403	0.00111563	0.274	0.948953	AT5G07580.1		Integrase-type DNA-binding superfamily protein	ERF
Potri.001G083900	-1.174	0.0118778	0.289	0.917021	AT2G46660.1	CYP78A6	cytochrome P450, family 78, subfamily A, polypeptide 6
Potri.001G099800	-1.214	0.0129501	-0.421	0.739359	AT1G63910.1	AtMYB103,MYB103	myb domain protein 103	MYB
Potri.001G163100	-1.071	0.0366605	-0.947	0.252757	AT3G14280.1
Potri.001G191800	-1.419	0.000646084	-0.117	0.98218	AT3G21330.1		basic helix-loop-helix (bHLH) DNA-binding superfamily protein	bHLH
Potri.001G218800	-1.453	2.8359e-05	0.007	0.999539	AT3G44350.2	anac061,NAC061	NAC domain containing protein 61	NAC
Potri.001G227000	-1.143	0.000553706	-0.391	0.846628	AT2G44500.1		O-fucosyltransferase family protein
Potri.001G270000	-0.984	0.0411714	0.383	0.866208	AT2G42280.1		basic helix-loop-helix (bHLH) DNA-binding superfamily protein	bHLH
Potri.001G289700	-1.078	0.00958877	-0.391	0.834441	AT1G17870.1	ATEGY3,EGY3	ethylene-dependent gravitropism-deficient and yellow-green-like 3
Potri.001G348900	-0.732	0.0397873	-0.225	0.898924	AT3G01500.2	ATBCA1,ATSABP3,CA1,SABP3	carbonic anhydrase 1
Potri.001G400100	-1.022	0.00298373	-0.497	0.68281	AT3G15353.1	ATMT3,MT3	metallothionein 3
Potri.001G404100	-1.359	0.000242977	0.563	0.677793	AT4G27410.2	ANAC072,RD26	NAC (No Apical Meristem) domain transcriptional regulator superfamily protein	NAC
Potri.001G404400	-1.174	0.0273856	-1.487	0.0564485	AT3G15510.1	ANAC056,ATNAC2,NAC2,NARS1	NAC domain containing protein 2	NAC
Potri.001G404600	-1.403	9.14168e-05	0.368	0.892366	AT1G52870.2		Peroxisomal membrane 22 kDa (Mpv17/PMP22) family protein
Potri.001G426200	-1.008	0.0332034	0.014	0.998381	AT4G27190.1		NB-ARC domain-containing disease resistance protein
Potri.001G456300	-1.047	0.00122562	0.077	0.983798	AT1G20925.1		Auxin efflux carrier family protein
Potri.002G032500	-0.743	0.0287213	-0.139	0.966874	AT1G19660.1		Wound-responsive family protein
Potri.002G081800	-0.952	0.00398396	0.354	0.841152	AT1G44170.1	ALDH3H1,ALDH4	aldehyde dehydrogenase 3H1
Potri.002G138900	-1.167	0.0169852	-0.396	0.757899	AT2G44745.1		WRKY family transcription factor	WRKY
Potri.002G196700	-0.893	0.0115007	0.508	0.740237	AT3G62550.1		Adenine nucleotide alpha hydrolases-like superfamily protein
Potri.003G070200	-1.367	0.00460388	-1.23	0.169963	AT3G14170.1		Plant protein of unknown function (DUF936)
Potri.003G152500	-0.971	0.0470605	-1.148	0.0503454
Potri.004G019900	-1.009	0.00182429	-1.307	0.133498	AT1G61800.1	ATGPT2,GPT2	glucose-6-phosphate/phosphate translocator 2
Potri.004G062000	-1.153	0.0309326	-1.399	0.0699841	AT1G17030.1
Potri.004G067400	-0.724	0.0401975	-0.598	0.195078	AT1G73390.1		Endosomal targeting BRO1-like domain-containing protein
Potri.004G138400	-1.299	6.4452e-05	0.345	0.924807	AT2G30390.1	ATFC-II,FC-II,FC2	ferrochelatase 2
Potri.004G140800	-1.06	0.00159098	-0.52	0.525832	AT2G15620.1	ATHNIR,NIR,NIR1	nitrite reductase 1
Potri.004G199900	-1.825	8.25039e-13	0.268	0.90367	AT2G47140.1		NAD(P)-binding Rossmann-fold superfamily protein
Potri.005G046700	-0.748	0.044266	-0.59	0.337781	AT1G54570.1		Esterase/lipase/thioesterase family protein
Potri.005G058200	-1.465	7.15077e-06	-0.173	0.964849	AT2G38820.2		Protein of unknown function (DUF506)
Potri.005G069500	-1.16	0.00108989	-0.328	0.887435	AT1G01720.1	ANAC002,ATAF1	NAC (No Apical Meristem) domain transcriptional regulator superfamily protein	NAC
Potri.005G096200	-1.215	0.00163772	-0.58	0.762221
Potri.005G098200	-1.626	0.000255896	0.111	0.983798	AT1G56010.2	anac021,ANAC022,NAC1	NAC domain containing protein 1	NAC
Potri.005G106400	-1.277	1.78908e-05	-0.257	0.93644	AT4G35770.1	ATSEN1,DIN1,SEN1	Rhodanese/Cell cycle control phosphatase superfamily protein
Potri.005G205000	-1.037	0.00617342	0.791	0.563246
Potri.005G211000	-1.174	0.0266383	-1.203	0.163665
Potri.005G211500	-0.943	0.00658439	-0.366	0.798808	AT3G22550.1		Protein of unknown function (DUF581)
Potri.005G259000	-0.92	0.0172445	-0.256	0.866174	AT1G21000.2		PLATZ transcription factor family protein
Potri.006G005600	-1.255	0.00967837	-1.163	0.221703	AT5G47635.1		Pollen Ole e 1 allergen and extensin family protein
Potri.006G038900	-1.149	0.0104698	-0.485	0.757216	AT2G41180.1		VQ motif-containing protein
Potri.006G052800	-0.81	0.042755	0.781	0.138818	AT3G57520.1	AtSIP2,SIP2	seed imbibition 2
Potri.006G102900	-0.985	0.027968	0.369	0.875707	AT5G58570.1
Potri.006G144500	-1.218	0.0134525	-0.761	0.575269	AT3G13750.1	BGAL1	beta galactosidase 1
Potri.006G213500	-1.133	0.0353627	-1.031	0.336542	AT5G02580.1		Plant protein 1589 of unknown function
Potri.006G221000	-1.046	0.0159812	-0.149	0.966513	AT5G21482.1	ATCKX5,CKX7	cytokinin oxidase 7
Potri.006G226700	-0.916	0.0476459	-0.679	0.464363	AT2G26170.1	CYP711A1,MAX1	cytochrome P450, family 711, subfamily A, polypeptide 1
Potri.007G008500	-1.095	0.000646084	0.053	0.993214	AT5G65730.1	XTH6	xyloglucan endotransglucosylase/hydrolase 6
Potri.007G014200	-0.783	0.0180211	-0.871	0.189574	AT2G18050.1	HIS1-3	histone H1-3
Potri.007G033700	-0.778	0.0180894	0.557	0.599041	AT5G66570.1	MSP-1,OE33,OEE1,OEE33,PSBO-1,PSBO1	PS II oxygen-evolving complex 1
Potri.007G044800	-1.047	0.0104043	-0.844	0.351828	AT5G67080.1	MAPKKK19	mitogen-activated protein kinase kinase kinase 19
Potri.007G052500	-0.708	0.0496037	-0.713	0.0885956	AT5G67370.1		Protein of unknown function (DUF1230)
Potri.007G065400	-1.392	0.00355215	0.27	0.951032	AT1G56010.2	anac021,ANAC022,NAC1	NAC domain containing protein 1	NAC
Potri.007G105900	-0.794	0.0463051	0.366	0.847893	AT5G64040.2	PSAN	photosystem I reaction center subunit PSI-N, chloroplast, putative / PSI-N, putative (PSAN)
Potri.008G049000	-1.439	0.00141366	-0.274	0.94667	AT2G39420.1		alpha/beta-Hydrolases superfamily protein
Potri.008G067500	-0.874	0.0110039	-0.521	0.498908	AT5G05690.1	CBB3,CPD,CYP90,CYP90A,CYP90A1,DWF3	Cytochrome P450 superfamily protein
Potri.008G130000	-1.64	1.479e-06	-0.365	0.876777	AT1G73670.1	ATMPK15,MPK15	MAP kinase 15
Potri.008G202200	-1.139	0.000192652	-0.242	0.878505	AT5G19040.1	ATIPT5,IPT5	isopentenyltransferase 5
Potri.008G203400	-1.171	1.47318e-05	-0.728	0.351756	AT5G19140.1	AILP1,ATAILP1	Aluminium induced protein with YGL and LRDR motifs
Potri.009G019200	-0.766	0.0251695	-0.074	0.990882	AT3G44350.2	anac061,NAC061	NAC domain containing protein 61	NAC
Potri.009G038300	-1.339	0.00358986	0.707	0.584916	AT5G59080.1
Potri.009G147500	-1.159	0.0172445	-0.991	0.208129	AT2G27740.1		Family of unknown function (DUF662)
Potri.010G071400	-1.009	0.0395364	-0.72	0.455911	AT1G08650.1	ATPPCK1,PPCK1	phosphoenolpyruvate carboxylase kinase 1
Potri.010G104500	-0.867	0.0233867	0.3	0.88926	AT1G68020.2	ATTPS6,TPS6	UDP-Glycosyltransferase / trehalose-phosphatase family protein
Potri.010G128900	-0.79	0.0364401	-0.237	0.924654	AT1G25550.1		myb-like transcription factor family protein	G2-like
Potri.010G166200	-1.294	0.00658439	-0.366	0.914801	AT1G69490.1	ANAC029,ATNAP,NAP	NAC-like, activated by AP3/PI	NAC
Potri.010G193500	-1.116	0.00159098	-0.414	0.821394	AT2G39920.2		HAD superfamily, subfamily IIIB acid phosphatase
Potri.010G211500	-1.823	1.95379e-09	1.143	0.0573327	AT3G55240.1		Plant protein 1589 of unknown function
Potri.010G248700	-0.794	0.0124168	0.243	0.893211	AT1G16880.1		uridylyltransferase-related
Potri.011G010000	-1.076	0.0390911	0.072	0.990553	AT3G21630.1	CERK1,LYSM RLK1	chitin elicitor receptor kinase 1
Potri.011G044300	-1.321	1.47318e-05	0.087	0.98706	AT2G28470.1	BGAL8	beta-galactosidase 8
Potri.011G142300	-0.984	0.00123227	0.756	0.599616	AT1G79040.1	PSBR	photosystem II subunit R
Potri.012G114200	-1.041	0.000327425	-0.296	0.89985	AT5G61670.1
Potri.012G141500	-1.067	0.0373394	-1.458	0.0700278	AT5G23760.1		Copper transport protein family
Potri.013G006100	-0.747	0.0226782	0.068	0.984463	AT1G09340.1	CRB,CSP41B	chloroplast RNA binding
Potri.013G054000	-1.24	0.000727542	-0.538	0.467062	AT3G04070.1	anac047,NAC047	NAC domain containing protein 47	NAC
Potri.013G101000	-2.873	1.69677e-24	0.264	0.939315	AT4G24340.1		Phosphorylase superfamily protein
Potri.013G148900	-0.884	0.00366773	-0.596	0.2928	AT4G03280.1	PETC,PGR1	photosynthetic electron transfer C
Potri.013G161500	-1.013	0.000610308	0.184	0.963674	AT5G10860.1		Cystathionine beta-synthase (CBS) family protein
Potri.014G030700	-1.034	0.00237383	-0.197	0.9655	AT1G18890.1	ATCDPK1,CDPK1,CPK10	calcium-dependent protein kinase 1
Potri.014G135900	-0.956	0.0257007	-0.2	0.965189	AT3G63010.1	ATGID1B,GID1B	alpha/beta-Hydrolases superfamily protein
Potri.014G143400	-0.821	0.0150827	-0.409	0.644681	AT2G42750.1		DNAJ heat shock N-terminal domain-containing protein
Potri.014G172400	-0.691	0.0454324	-0.002	0.999648	AT1G61520.1	LHCA3	photosystem I light harvesting complex gene 3
Potri.014G198400	-0.841	0.00997776	0.113	0.978217	AT1G61520.1	LHCA3	photosystem I light harvesting complex gene 3
Potri.015G014000	-1.561	9.22382e-08	-0.914	0.0744689	AT5G53420.1		CCT motif family protein
Potri.015G033600	-1.917	5.69013e-06	-1.025	0.229491	AT1G17950.1	ATMYB52,BW52,MYB52	myb domain protein 52	MYB
Potri.015G103500	-0.732	0.0471316	-0.406	0.651951	AT5G41110.1
Potri.016G065900	-0.779	0.0271499	-0.895	0.0511235	AT5G06530.1		ABC-2 type transporter family protein
Potri.016G070200	-1.032	0.00197541	-0.785	0.122598	AT3G11670.1	DGD1	UDP-Glycosyltransferase superfamily protein
Potri.016G098200	-1.384	3.08583e-05	-0.528	0.621864	AT2G36830.1	GAMMA-TIP,GAMMA-TIP1,TIP1;1	gamma tonoplast intrinsic protein
Potri.017G052300	-1.658	2.97075e-05	-0.831	0.450046	AT1G22360.1	AtUGT85A2,UGT85A2	UDP-glucosyl transferase 85A2
Potri.017G058400	-1.066	0.000511751	-0.539	0.453661	AT4G13830.2	J20	DNAJ-like 20
Potri.017G107500	-1.373	0.000343957	0.436	0.82944	AT3G02380.1	ATCOL2,COL2	CONSTANS-like 2	CO-like
Potri.017G108300	-1.133	0.018759	-1.141	0.0820751	AT5G38760.1		Late embryogenesis abundant protein (LEA) family protein
Potri.017G108900	-0.813	0.0198306	0.031	0.996239	AT5G15948.1	CPuORF10	conserved peptide upstream open reading frame 10
Potri.018G002900	-0.79	0.042755	0.925	0.0810647	AT4G31290.1		ChaC-like family protein
Potri.018G058600	-0.979	0.0150827	0.17	0.971777	AT4G29190.1		Zinc finger C-x8-C-x5-C-x3-H type family protein	C3H
Potri.018G088600	-1.03	0.0253371	-0.775	0.281781	AT1G29670.1		GDSL-like Lipase/Acylhydrolase superfamily protein
Potri.018G089500	-1.035	0.00419285	-0.207	0.91343	AT1G29660.1		GDSL-like Lipase/Acylhydrolase superfamily protein
Potri.019G093900	-0.937	0.019955	0.086	0.989228	AT3G54420.1	ATCHITIV,ATEP3,CHIV,EP3	homolog of carrot EP3-3 chitinase
Potri.019G103500	-1.37	0.000604778	-0.227	0.938303	AT4G03400.1	DFL2,GH3-10	Auxin-responsive GH3 family protein
Potri.019G116300	-0.93	0.00945278	0.707	0.549081	AT4G28240.1		Wound-responsive family protein
Potri.T053600	-1.066	0.0344946	-1.46	0.066675	AT3G60470.1		Plant protein of unknown function (DUF247)
Potri.001G009100	0.007	0.999108	-1.522	0.0241833	AT1G58170.1		Disease resistance-responsive (dirigent-like protein) family protein
Potri.001G012300	-0.33	0.950535	-1.312	0.0403654	AT5G42340.1	PUB15	Plant U-Box 15
Potri.001G024100	-0.404	0.821152	-1.402	0.00166063	AT2G38800.1		Plant calmodulin-binding protein-related
Potri.001G032400	0.321	0.957802	-1.617	0.0156432	AT5G16080.1	AtCXE17,CXE17	carboxyesterase 17
Potri.001G036900	-0.563	0.570309	-1.627	0.00407872	AT3G21240.1	4CL2,AT4CL2	4-coumarate:CoA ligase 2
Potri.001G048900	-0.556	0.582041	-1.408	0.0168115	AT1G15520.1	ABCG40,ATABCG40,ATPDR12,PDR12	pleiotropic drug resistance 12
Potri.001G051500	0.128	0.999108	-1.504	0.00944512	AT5G13930.1	ATCHS,CHS,TT4	Chalcone and stilbene synthase family protein
Potri.001G051600	-0.157	0.999108	-1.587	0.00279425	AT5G13930.1	ATCHS,CHS,TT4	Chalcone and stilbene synthase family protein
Potri.001G055100	-0.672	0.322452	-1.603	0.0220584	AT1G27920.1	MAP65-8	microtubule-associated protein 65-8
Potri.001G060800	-0.444	0.609011	-1.001	0.0219659	AT5G13160.1	PBS1	Protein kinase superfamily protein
Potri.001G065300	0.63	0.26797	-1.253	0.0095426	AT5G49290.1	ATRLP56,RLP56	receptor like protein 56
Potri.001G068100	-0.615	0.453776	-2.053	0.000383475	AT1G27440.1	ATGUT1,GUT2,IRX10	Exostosin family protein
Potri.001G069500	-0.34	0.9133	-1.437	0.00485287	AT1G76390.1		ARM repeat superfamily protein
Potri.001G078400	-0.364	0.873768	-1.521	0.00291671
Potri.001G079000	-0.445	0.485757	-1.016	0.0287692	AT5G49730.1	ATFRO6,FRO6	ferric reduction oxidase 6
Potri.001G086900	-0.377	0.930525	-1.542	0.030929	AT4G24050.1		NAD(P)-binding Rossmann-fold superfamily protein
Potri.001G087900	-0.444	0.634327	-0.987	0.0230648	AT4G24020.1	NLP7	NIN like protein 7	Nin-like
Potri.001G088900	-0.541	0.564128	-1.246	0.0423462	AT1G64500.1		Glutaredoxin family protein
Potri.001G093100	-0.52	0.526809	-2.181	4.21014e-10
Potri.001G105100	-0.313	0.846362	-0.98	0.0103032	AT1G63460.1	ATGPX8,GPX8	glutathione peroxidase 8
Potri.001G107000	-0.951	0.116686	-2.06	0.00220242	AT5G23750.1		Remorin family protein
Potri.001G108800	-0.198	0.999108	-1.894	0.0029434	AT4G23060.1	IQD22	IQ-domain 22
Potri.001G109800	-0.771	0.0804394	-1.846	0.000553377	AT1G12710.1	AtPP2-A12,PP2-A12	phloem protein 2-A12
Potri.001G113900	-0.781	0.132374	-1.299	0.0162927	AT2G45550.1	CYP76C4	cytochrome P450, family 76, subfamily C, polypeptide 4
Potri.001G121600	-0.873	0.179452	-1.594	0.0366155	AT4G22560.1
Potri.001G124200	-0.337	0.825529	-1.039	0.0134858	AT3G47420.1	ATPS3,PS3	phosphate starvation-induced gene 3
Potri.001G128200	0.145	0.999108	-1.11	0.033863	AT5G45275.1		Major facilitator superfamily protein
Potri.001G133200	0.015	0.999108	-1.584	0.001098	AT1G32100.1	ATPRR1,PRR1	pinoresinol reductase 1
Potri.001G137900	-0.119	0.999108	-0.788	0.0421212	AT2G35490.1		Plastid-lipid associated protein PAP / fibrillin family protein
Potri.001G148700	-0.256	0.924006	-1.091	0.0376293	AT4G17670.1		Protein of unknown function (DUF581)
Potri.001G151800	-0.216	0.974554	-1.086	0.00626124	AT5G47120.1	ATBI-1,ATBI1,BI-1,BI1	BAX inhibitor 1
Potri.001G157600	-0.69	0.104577	-1.409	3.97148e-05	AT5G47470.1		Nodulin MtN21 /EamA-like transporter family protein
Potri.001G158900	-0.36	0.79962	-0.936	0.0482002	AT5G44790.1	HMA7,RAN1	copper-exporting ATPase / responsive-to-antagonist 1 / copper-transporting ATPase (RAN1)
Potri.001G163700	-0.176	0.999108	-1.058	0.00438598	AT1G53910.3	RAP2.12	related to AP2 12	ERF
Potri.001G168000	-0.201	0.999108	-1.94	2.08162e-05	AT2G05940.1		Protein kinase superfamily protein
Potri.001G173700	-0.055	0.999108	-1.095	0.0374738	AT1G52700.1		alpha/beta-Hydrolases superfamily protein
Potri.001G174900	-0.544	0.311424	-1.039	0.00949467	AT1G80280.1		alpha/beta-Hydrolases superfamily protein
Potri.001G180600	-0.444	0.803673	-1.574	0.00545864	AT1G52330.1		Late embryogenesis abundant (LEA) hydroxyproline-rich glycoprotein family
Potri.001G212800	-0.893	0.178234	-1.45	0.0438029	AT5G22860.1		Serine carboxypeptidase S28 family protein
Potri.001G235500	-0.452	0.783622	-1.518	0.0122032	AT3G46130.1	ATMYB48,ATMYB48-1,ATMYB48-2,ATMYB48-3,MYB48	myb domain protein 48	MYB
Potri.001G250500	-0.36	0.778978	-1.182	0.000383475	AT1G07230.1	NPC1	non-specific phospholipase C1
Potri.001G251200	-0.601	0.256554	-1.153	0.00579036	AT2G38170.1	ATCAX1,CAX1,RCI4	cation exchanger 1
Potri.001G255100	0.15	0.999108	-1.482	0.00579036	AT4G16260.1		Glycosyl hydrolase superfamily protein
Potri.001G255700	-0.801	0.212976	-1.72	0.00173257
Potri.001G265300	-0.01	0.999108	-1.575	0.0287692	AT2G28305.1	ATLOG1,LOG1	Putative lysine decarboxylase family protein
Potri.001G287200	-0.334	0.951878	-1.868	0.00166729	AT4G37850.1		basic helix-loop-helix (bHLH) DNA-binding superfamily protein	bHLH
Potri.001G289400	-0.516	0.309017	-0.868	0.0215864	AT1G50020.1
Potri.001G289500	-0.894	0.123763	-2.027	0.000193866	AT4G14960.2	TUA6	Tubulin/FtsZ family protein
Potri.001G293400	-0.544	0.288439	-1.247	0.000849103	AT2G14750.1	AKN1,APK,APK1,ATAKN1	APS kinase
Potri.001G304800	-0.546	0.470492	-1.786	0.000431133	AT4G34050.1	CCoAOMT1	S-adenosyl-L-methionine-dependent methyltransferases superfamily protein
Potri.001G320500	-0.176	0.999108	-1.029	0.00842387	AT4G13940.1	ATSAHH1,EMB1395,HOG1,MEE58,SAHH1	S-adenosyl-L-homocysteine hydrolase
Potri.001G320800	-0.929	0.149394	-2.266	0.00045299	AT5G03170.1	ATFLA11,FLA11	FASCICLIN-like arabinogalactan-protein 11
Potri.001G325200	0.522	0.494579	-1.939	1.05756e-06	AT3G02040.1	SRG3	senescence-related gene 3
Potri.001G330800	-0.411	0.548234	-0.92	0.00982052	AT3G27110.1		Peptidase family M48 family protein
Potri.001G335900	-0.333	0.923135	-1.069	0.0408398	AT1G19250.1	FMO1	flavin-dependent monooxygenase 1
Potri.001G349500	-0.419	0.659161	-1.091	0.01285	AT5G14710.1
Potri.001G352200	-0.111	0.999108	-1.591	0.0354769	AT4G18210.1	ATPUP10,PUP10	purine permease 10
Potri.001G352300	-0.89	0.0815961	-1.45	0.00876564	AT2G34410.1		O-acetyltransferase family protein
Potri.001G353500	-0.698	0.0695463	-1.806	1.3083e-07	AT1G29390.1	COR314-TM2,COR413IM2	cold regulated 314 thylakoid membrane 2
Potri.001G372100	-0.539	0.497989	-1.092	0.0474896	AT1G30500.2	NF-YA7	nuclear factor Y, subunit A7	NF-YA
Potri.001G378400	-0.353	0.876901	-1.392	0.010028	AT1G78440.1	ATGA2OX1,GA2OX1	Arabidopsis thaliana gibberellin 2-oxidase 1
Potri.001G378700	-0.25	0.999108	-1.651	0.0252725	AT3G20180.1		Copper transport protein family
Potri.001G379000	-0.498	0.476551	-0.985	0.0127198	AT1G17100.1		SOUL heme-binding family protein
Potri.001G394900	0.153	0.999108	-1.694	0.0100882
Potri.001G416200	-0.535	0.394848	-0.987	0.0469914	AT5G54660.1		HSP20-like chaperones superfamily protein
Potri.001G416800	-0.507	0.567146	-2.85	2.75303e-07	AT5G54690.1	GAUT12,IRX8,LGT6	galacturonosyltransferase 12
Potri.001G448000	-0.917	0.126956	-1.911	0.00552335	AT5G17540.1		HXXXD-type acyl-transferase family protein
Potri.001G449600	-0.257	0.968713	-1.066	0.0133954	AT5G42110.1
Potri.001G454800	-0.356	0.89374	-1.362	0.00309185	AT1G33260.2		Protein kinase superfamily protein
Potri.001G455000	-0.314	0.896077	-1.208	0.00884495	AT4G10380.1	NIP5;1,NLM6,NLM8	NOD26-like intrinsic protein 5;1
Potri.002G008800	-0.579	0.27679	-1.129	0.0029782	AT4G35550.1	ATWOX13,HB-4,WOX13	WUSCHEL related homeobox 13	WOX
Potri.002G009800	-0.231	0.960875	-0.784	0.0311859	AT4G35090.1	CAT2	catalase 2
Potri.002G017200	-0.348	0.944946	-2.097	0.000351106	AT1G60420.1		DC1 domain-containing protein
Potri.002G018000	-0.723	0.401982	-2.743	6.3392e-06	AT5G42180.1		Peroxidase superfamily protein
Potri.002G029300	-0.463	0.653303	-1.873	1.1702e-05	AT2G16430.2	ATPAP10,PAP10	purple acid phosphatase 10
Potri.002G033400	-0.094	0.999108	-0.995	0.0147442	AT1G27680.1	APL2	ADPGLC-PPase large subunit
Potri.002G033600	0.063	0.999108	-1.276	0.0150603	AT5G42800.1	DFR,M318,TT3	dihydroflavonol 4-reductase
Potri.002G050800	-0.713	0.210133	-1.397	0.00246098	AT3G22550.1		Protein of unknown function (DUF581)
Potri.002G054100	-0.266	0.978282	-1.38	0.0309009	AT4G09820.1	BHLH42,TT8	basic helix-loop-helix (bHLH) DNA-binding superfamily protein	bHLH
Potri.002G055100	-0.181	0.999108	-2.094	9.25983e-05	AT3G59030.1	ATTT12,TT12	MATE efflux family protein
Potri.002G056800	-0.538	0.481915	-1.227	0.0336271	AT5G17230.1	PSY	PHYTOENE SYNTHASE
Potri.002G057400	-0.201	0.999108	-0.973	0.00881941	AT1G06570.1	HPD,PDS1	phytoene desaturation 1
Potri.002G057700	-0.52	0.351025	-1.497	7.17678e-05	AT1G06550.1		ATP-dependent caseinolytic (Clp) protease/crotonase family protein
Potri.002G062600	-0.163	0.999108	-0.896	0.0427125	AT1G22750.2
Potri.002G064000	-0.255	0.926256	-1.184	0.000432593	AT1G34060.1		Pyridoxal phosphate (PLP)-dependent transferases superfamily protein
Potri.002G090700	-0.453	0.494658	-1.116	0.00320511	AT1G77920.1		bZIP transcription factor family protein	bZIP
Potri.002G092900	-0.466	0.411927	-0.809	0.0320922	AT1G78020.1		Protein of unknown function (DUF581)
Potri.002G101300	-1	0.0669647	-3.309	1.73339e-10	AT1G72230.1		Cupredoxin superfamily protein
Potri.002G103300	-0.327	0.788879	-0.909	0.0130515	AT5G50010.1		sequence-specific DNA binding transcription factors;transcription regulators
Potri.002G105300	0.092	0.999108	-2.137	0.000115629	AT3G56770.1		basic helix-loop-helix (bHLH) DNA-binding superfamily protein	bHLH
Potri.002G109200	-0.395	0.671876	-1	0.0117351	AT5G26780.1	SHM2	serine hydroxymethyltransferase 2
Potri.002G118700	-0.295	0.966196	-1.893	0.000424736	AT5G43190.1		Galactose oxidase/kelch repeat superfamily protein
Potri.002G118800	-0.375	0.753879	-1.554	2.12612e-05	AT3G01400.1		ARM repeat superfamily protein
Potri.002G128800	-0.696	0.391734	-1.549	0.013101	AT5G42680.1		Protein of unknown function, DUF617
Potri.002G132900	-0.897	0.18098	-1.542	0.0457762	AT1G19300.1	ATGATL1,GATL1,GLZ1,PARVUS	Nucleotide-diphospho-sugar transferases superfamily protein
Potri.002G134600	-0.117	0.999108	-1.052	0.00300696	AT5G26667.2	PYR6	P-loop containing nucleoside triphosphate hydrolases superfamily protein
Potri.002G136700	-0.529	0.324469	-0.949	0.0192173	AT2G35680.1		Phosphotyrosine protein phosphatases superfamily protein
Potri.002G143400	-1.091	0.0516141	-1.923	0.00238109	AT3G60550.1	CYCP3;2	cyclin p3;2
Potri.002G163400	-0.35	0.872423	-1.381	0.0224872	AT1G01490.1		Heavy metal transport/detoxification superfamily protein
Potri.002G168300	-0.905	0.129061	-1.818	0.00862473	AT3G61660.1
Potri.002G178700	-0.462	0.846032	-1.802	0.00930313	AT2G46770.1	ANAC043,EMB2301,NST1	NAC (No Apical Meristem) domain transcriptional regulator superfamily protein	NAC
Potri.002G191000	-0.391	0.721876	-2.108	8.73823e-08	AT3G62270.1		HCO3- transporter family
Potri.002G195400	-0.275	0.838518	-2.663	1.27278e-05	AT2G47360.1
Potri.002G203400	-0.328	0.846823	-1.208	0.00520478	AT1G02816.1		Protein of unknown function, DUF538
Potri.002G213200	-0.372	0.897187	-1.45	0.00943416	AT2G03430.1		Ankyrin repeat family protein
Potri.002G230600	-0.32	0.853877	-1.114	0.0150603	AT3G59310.1		Eukaryotic protein of unknown function (DUF914)
Potri.002G231900	-0.232	0.991212	-1.249	0.019899	AT2G43120.1		RmlC-like cupins superfamily protein
Potri.002G257900	-0.531	0.552146	-1.53	0.046076	AT5G44030.1	CESA4,IRX5,NWS2	cellulose synthase A4
Potri.003G012100	-0.05	0.999108	-0.871	0.0199057	AT1G15760.1		Sterile alpha motif (SAM) domain-containing protein
Potri.003G030500	-0.683	0.140171	-1.406	0.00159222	AT1G49390.1		2-oxoglutarate (2OG) and Fe(II)-dependent oxygenase superfamily protein
Potri.003G043600	-0.011	0.999108	-0.925	0.0491832	AT5G11970.1		Protein of unknown function (DUF3511)
Potri.003G047700	-0.155	0.999108	-1.129	0.0302118	AT5G56600.1	PFN3,PRF3	profilin 3
Potri.003G059700	-0.11	0.999108	-1.694	7.32836e-05	AT1G15460.1	ATBOR4,BOR4	HCO3- transporter family
Potri.003G062400	-0.516	0.653439	-1.418	0.00802823	AT1G80160.1		Lactoylglutathione lyase / glyoxalase I family protein
Potri.003G067700	-0.615	0.140569	-1.522	7.09969e-07	AT1G54100.1	ALDH7B4	aldehyde dehydrogenase 7B4
Potri.003G085000	-0.566	0.459289	-1.038	0.0475371	AT4G17080.1		Histone H3 K4-specific methyltransferase SET7/9 family protein
Potri.003G085700	-0.272	0.926256	-1.04	0.0270048	AT4G17670.1		Protein of unknown function (DUF581)
Potri.003G091500	-0.661	0.22609	-0.988	0.0410488	AT5G46800.1	BOU	Mitochondrial substrate carrier family protein
Potri.003G100200	-0.792	0.212976	-2.083	0.000176259	AT1G32100.1	ATPRR1,PRR1	pinoresinol reductase 1
Potri.003G109300	-0.17	0.999108	-0.897	0.033841	AT3G47420.1	ATPS3,PS3	phosphate starvation-induced gene 3
Potri.003G115300	-0.539	0.290133	-0.839	0.0408398	AT1G62850.2		Class I peptide chain release factor
Potri.003G116200	-0.417	0.814533	-1.556	0.00184641	AT4G22758.1
Potri.003G116600	-0.508	0.610537	-1.188	0.0425114	AT1G12420.1	ACR8	ACT domain repeat 8
Potri.003G122800	-0.257	0.969626	-1.193	0.00612951	AT4G23060.1	IQD22	IQ-domain 22
Potri.003G124400	-0.807	0.284857	-1.877	0.00542193	AT5G23750.1		Remorin family protein
Potri.003G133400	-0.377	0.923135	-1.446	0.0385105	AT2G46150.1		Late embryogenesis abundant (LEA) hydroxyproline-rich glycoprotein family
Potri.003G134600	0.749	0.131361	-1.849	7.04904e-05	AT1G64160.1		Disease resistance-responsive (dirigent-like protein) family protein
Potri.003G142300	-0.597	0.296626	-1.436	0.000532518	AT4G23990.1	ATCSLG3,CSLG3	cellulose synthase like G3
Potri.003G142800	-0.473	0.568465	-1.291	0.00351962	AT3G49290.1	ABIL2	ABL interactor-like protein 2
Potri.003G143300	0.14	0.999108	-0.982	0.0199057
Potri.003G161900	-0.492	0.659553	-1.298	0.0150603	AT5G13420.1		Aldolase-type TIM barrel family protein
Potri.003G167400	0.645	0.51005	-1.615	0.031272	AT5G50760.1		SAUR-like auxin-responsive protein family
Potri.003G177700	-0.533	0.487214	-1.066	0.0344014	AT1G04760.1	ATVAMP726,VAMP726	vesicle-associated membrane protein 726
Potri.003G181400	-0.659	0.208798	-1.529	0.000207467	AT1G15950.1	ATCCR1,CCR1,IRX4	cinnamoyl coa reductase 1
Potri.003G201700	-0.27	0.991022	-1.432	0.0177177	AT1G29050.1	TBL38	TRICHOME BIREFRINGENCE-LIKE 38
Potri.003G214700	0.311	0.963937	-1.911	0.00170821	AT5G06720.1	ATPA2,PA2	peroxidase 2
Potri.003G217200	-0.055	0.999108	-0.837	0.0327065	AT5G19860.1		Protein of unknown function, DUF538
Potri.004G001800	-0.404	0.753858	-1.552	0.00048969	AT1G12020.1
Potri.004G012100	-0.477	0.430874	-0.846	0.0357914	AT4G21990.1	APR3,ATAPR3,PRH-26,PRH26	APS reductase 3
Potri.004G018600	-0.365	0.940132	-1.941	0.00232439	AT4G21780.1
Potri.004G021500	0	0.999993	-1.319	0.000104412	AT4G05320.3	UBQ10	polyubiquitin 10
Potri.004G030700	-0.216	0.970422	-1.704	5.09633e-05	AT1G61720.1	BAN	NAD(P)-binding Rossmann-fold superfamily protein
Potri.004G053800	-0.555	0.320059	-1.268	0.000631242	AT5G45920.1		SGNH hydrolase-type esterase superfamily protein
Potri.004G055000	-0.295	0.899809	-1.083	0.0155178	AT1G29050.1	TBL38	TRICHOME BIREFRINGENCE-LIKE 38
Potri.004G096500	-0.642	0.537468	-1.789	0.0075158	AT1G66880.1		Protein kinase superfamily protein
Potri.004G096600	0.08	0.999108	-1.711	0.00271702	AT5G38210.1		Protein kinase family protein
Potri.004G096900	-0.081	0.999108	-1.598	0.0355579	AT5G38210.1		Protein kinase family protein
Potri.004G099400	-0.961	0.122677	-1.853	0.00556355	AT1G73830.1	BEE3	BR enhanced expression 3	bHLH
Potri.004G100100	-0.439	0.826869	-1.579	0.00725448	AT3G02550.1	LBD41	LOB domain-containing protein 41	LBD
Potri.004G105000	-0.244	0.981814	-1.382	0.0073953	AT5G14700.1		NAD(P)-binding Rossmann-fold superfamily protein
Potri.004G118600	-0.847	0.109041	-1.479	0.00296155	AT5G15490.1		UDP-glucose 6-dehydrogenase family protein
Potri.004G138300	-0.509	0.306238	-1.178	0.000947484	AT1G10940.1	ASK1,SNRK2-4,SNRK2.4,SRK2A	Protein kinase superfamily protein
Potri.004G149800	-0.654	0.374454	-1.329	0.0127198	AT5G66580.1
Potri.004G151700	-0.575	0.432761	-1.241	0.00537903	AT3G18830.1	ATPLT5,ATPMT5,PMT5	polyol/monosaccharide transporter 5
Potri.004G152300	-0.592	0.318759	-1.19	0.00499112	AT3G18830.1	ATPLT5,ATPMT5,PMT5	polyol/monosaccharide transporter 5
Potri.004G158200	-0.485	0.482261	-0.818	0.0374738	AT1G75390.1	AtbZIP44,bZIP44	basic leucine-zipper 44	bZIP
Potri.004G159300	-0.358	0.71255	-1.072	0.0029782	AT4G34610.1	BLH6	BEL1-like homeodomain 6	TALE
Potri.004G173800	-0.698	0.418653	-1.535	0.0189662	AT2G16700.1	ADF5,ATADF5	actin depolymerizing factor 5
Potri.004G211900	-0.551	0.503329	-2.675	2.84816e-06	AT2G28315.1		Nucleotide/sugar transporter family protein
Potri.004G214100	-0.326	0.816147	-0.934	0.0231823	AT2G36970.1		UDP-Glycosyltransferase superfamily protein
Potri.004G234600	-0.458	0.478492	-0.938	0.015032	AT4G19390.1		Uncharacterised protein family (UPF0114)
Potri.004G234900	-0.96	0.126333	-2.707	8.79979e-06	AT4G19380.1		Long-chain fatty alcohol dehydrogenase family protein
Potri.005G001100	-0.715	0.102968	-1.048	0.00891501
Potri.005G004900	-0.302	0.861568	-0.989	0.0113253	AT1G09430.1	ACLA-3	ATP-citrate lyase A-3
Potri.005G006300	-0.099	0.999108	-1.948	0.00378682
Potri.005G025200	-0.585	0.340488	-1.528	8.01623e-05	AT5G27730.1		Protein of unknown function (DUF1624)
Potri.005G040600	-0.576	0.221021	-0.81	0.0466049	AT5G27320.1	ATGID1C,GID1C	alpha/beta-Hydrolases superfamily protein
Potri.005G055900	0.182	0.999108	-0.973	0.0288953	AT1G54460.1		TPX2 (targeting protein for Xklp2) protein family
Potri.005G065200	-0.588	0.503679	-2.554	3.26876e-06	AT5G64030.1		S-adenosyl-L-methionine-dependent methyltransferases superfamily protein
Potri.005G071900	-0.228	0.969999	-1.171	0.00170551	AT2G22430.1	ATHB6,HB6	homeobox protein 6	HD-ZIP
Potri.005G079200	-0.251	0.960875	-1.468	0.000636351	AT2G22250.2	AAT,ATAAT,MEE17	aspartate aminotransferase
Potri.005G082000	-0.052	0.999108	-1.33	0.0162927	AT5G65210.1	TGA1	bZIP transcription factor family protein	bZIP
Potri.005G083400	-0.143	0.999108	-1.299	0.0417453	AT4G14540.1	NF-YB3	nuclear factor Y, subunit B3	NF-YB
Potri.005G084200	-0.395	0.782177	-1.746	0.00071882	AT2G21970.1	2017-09-02	stress enhanced protein 2
Potri.005G085200	0.229	0.99211	-1.817	2.9952e-05	AT5G64810.1	ATWRKY51,WRKY51	WRKY DNA-binding protein 51	WRKY
Potri.005G094900	-0.521	0.572622	-1.255	0.0291014	AT1G56170.1	ATHAP5B,HAP5B,NF-YC2	nuclear factor Y, subunit C2	NF-YC
Potri.005G096400	-0.019	0.999108	-1.336	0.046617	AT3G12830.1		SAUR-like auxin-responsive protein family
Potri.005G096600	-0.343	0.941826	-3.432	1.10539e-10	AT1G79180.1	ATMYB63,MYB63	myb domain protein 63	MYB
Potri.005G099100	-0.249	0.977176	-1.313	0.00179044
Potri.005G108900	-0.123	0.999108	-0.991	0.00426777	AT5G42180.1		Peroxidase superfamily protein
Potri.005G113700	0.101	0.999108	-1.884	3.56752e-05	AT3G51240.1	F3\'H,F3H,TT6	flavanone 3-hydroxylase
Potri.005G113900	0.383	0.737281	-1.86	6.24116e-05	AT3G51240.1	F3\'H,F3H,TT6	flavanone 3-hydroxylase
Potri.005G114000	0.557	0.40648	-1.562	0.0073953	AT3G51240.1	F3\'H,F3H,TT6	flavanone 3-hydroxylase
Potri.005G117000	-0.654	0.120972	-1.34	9.37568e-05	AT1G15380.1		Lactoylglutathione lyase / glyoxalase I family protein
Potri.005G117100	-0.486	0.566238	-1.299	0.00423832	AT4G38960.1		B-box type zinc finger family protein	DBB
Potri.005G117500	-0.605	0.393834	-2.343	0.000101661	AT4G36220.1	CYP84A1,FAH1	ferulic acid 5-hydroxylase 1
Potri.005G141300	-0.539	0.587711	-2.602	3.03038e-06	AT5G67210.1		Protein of unknown function (DUF579)
Potri.005G141600	-0.714	0.0743129	-0.877	0.0395323	AT1G47128.1	RD21,RD21A	Granulin repeat cysteine protease family protein
Potri.005G161500	-0.66	0.513019	-1.838	0.0079917	AT4G40060.1	ATHB-16,ATHB16,HB16	homeobox protein 16	HD-ZIP
Potri.005G181600	-0.441	0.829037	-1.155	0.045449	AT1G77380.1	AAP3,ATAAP3	amino acid permease 3
Potri.005G205700	-0.513	0.531549	-1.837	0.00881941	AT1G06660.1
Potri.005G208600	-0.256	0.954598	-1.332	0.00168777	AT4G09820.1	BHLH42,TT8	basic helix-loop-helix (bHLH) DNA-binding superfamily protein	bHLH
Potri.005G209800	-0.659	0.0865242	-0.863	0.0187234	AT3G63120.1	CYCP1;1	cyclin p1;1
Potri.005G219800	-0.292	0.859448	-0.99	0.0205783	AT2G30620.1		winged-helix DNA-binding transcription factor family protein
Potri.005G228800	-0.487	0.776168	-1.586	0.0330983	AT5G42785.1
Potri.005G229500	-0.324	0.894326	-2.175	1.21041e-06	AT5G42800.1	DFR,M318,TT3	dihydroflavonol 4-reductase
Potri.005G246800	-0.033	0.999108	-1.46	0.00128409	AT4G35750.1		SEC14 cytosolic factor family protein / phosphoglyceride transfer family protein
Potri.005G257800	-0.489	0.650817	-1.41	0.00831197	AT1G76550.1		Phosphofructokinase family protein
Potri.006G011600	-0.558	0.354955	-2.438	7.42058e-14
Potri.006G022000	-0.374	0.824565	-1.131	0.0489189	AT1G30620.1	HSR8,MUR4,UXE1	NAD(P)-binding Rossmann-fold superfamily protein
Potri.006G033300	-0.708	0.267303	-2.346	2.98963e-07	AT2G40890.1	CYP98A3	cytochrome P450, family 98, subfamily A, polypeptide 3
Potri.006G040300	-0.265	0.956575	-0.996	0.0454812	AT4G18593.1		dual specificity protein phosphatase-related
Potri.006G044300	0.21	0.990612	-1.162	0.00295935
Potri.006G049200	-0.351	0.956969	-1.965	0.00378362	AT2G41690.1	AT-HSFB3,HSFB3	heat shock transcription factor B3	HSF
Potri.006G053200	-0.91	0.145392	-2.109	0.000738116	AT3G57540.1		Remorin family protein
Potri.006G055400	-0.147	0.999108	-0.877	0.031933	AT3G57680.1		Peptidase S41 family protein
Potri.006G068400	-0.676	0.137573	-0.851	0.0387805	AT5G35410.1	ATSOS2,CIPK24,SNRK3.11,SOS2	Protein kinase superfamily protein
Potri.006G069500	0.039	0.999108	-1.222	0.00725448	AT2G26660.1	ATSPX2,SPX2	SPX domain gene 2
Potri.006G087200	-0.707	0.0815961	-1.306	8.1167e-05	AT2G45400.1	BEN1	NAD(P)-binding Rossmann-fold superfamily protein
Potri.006G087500	-0.502	0.782582	-3.331	2.97477e-09	AT5G60020.1	ATLAC17,LAC17	laccase 17
Potri.006G092100	-0.18	0.999108	-0.949	0.046601	AT2G37920.1	emb1513	copper ion transmembrane transporters
Potri.006G093400	0.086	0.999108	-1.728	0.000110451	AT1G53540.1		HSP20-like chaperones superfamily protein
Potri.006G097000	-1.022	0.0858606	-2.377	0.000122751	AT2G38080.1	ATLMCO4,IRX12,LAC4,LMCO4	Laccase/Diphenol oxidase family protein
Potri.006G109100	-0.096	0.999108	-1.287	0.00283865	AT3G56400.1	ATWRKY70,WRKY70	WRKY DNA-binding protein 70	WRKY
Potri.006G114800	-0.318	0.878834	-1.137	0.0112608	AT3G52880.1	ATMDAR1,MDAR1	monodehydroascorbate reductase 1
Potri.006G119300	-0.329	0.935333	-2.265	5.45162e-06	AT2G27920.1	SCPL51	serine carboxypeptidase-like 51
Potri.006G120400	-0.913	0.120023	-1.722	0.0151425	AT1G63300.1		Myosin heavy chain-related protein
Potri.006G123200	-0.397	0.846823	-1.519	0.00411574	AT2G36880.1	MAT3	methionine adenosyltransferase 3
Potri.006G128200	-0.577	0.519726	-1.659	0.000486761	AT2G37170.1	PIP2;2,PIP2B	plasma membrane intrinsic protein 2
Potri.006G129200	-0.582	0.513265	-3.999	9.9092e-16	AT5G03170.1	ATFLA11,FLA11	FASCICLIN-like arabinogalactan-protein 11
Potri.006G132200	-0.269	0.947516	-0.93	0.0345557	AT3G09640.1	APX1B,APX2	ascorbate peroxidase 2
Potri.006G137200	-0.61	0.459289	-1.534	0.00403432	AT5G20810.1		SAUR-like auxin-responsive protein family
Potri.006G137300	-0.987	0.0883844	-3.112	5.44174e-11	AT1G19230.1		Riboflavin synthase-like superfamily protein
Potri.006G137700	-0.612	0.34836	-2.662	3.78044e-10	AT5G20790.1
Potri.006G141700	-0.616	0.116686	-1.312	1.60471e-05	AT3G45310.1		Cysteine proteinases superfamily protein
Potri.006G153300	-0.372	0.830343	-1.279	0.0186997	AT5G19740.1		Peptidase M28 family protein
Potri.006G155500	-0.61	0.18281	-1.024	0.0049448	AT3G24420.1		alpha/beta-Hydrolases superfamily protein
Potri.006G158900	0.676	0.483874	-2.352	0.000193866	AT5G19600.1	SULTR3;5	sulfate transporter 3;5
Potri.006G171400	-0.492	0.339786	-0.825	0.039197	AT5G57630.1	CIPK21,SnRK3.4	CBL-interacting protein kinase 21
Potri.006G181300	-0.98	0.0991841	-1.971	0.00398918	AT4G30830.1		Protein of unknown function, DUF593
Potri.006G195300	-0.039	0.999108	-1.09	0.0441682	AT5G49040.1		Disease resistance-responsive (dirigent-like protein) family protein
Potri.006G214300	-0.232	0.996351	-1.128	0.0298173	AT3G09520.1	ATEXO70H4,EXO70H4	exocyst subunit exo70 family protein H4
Potri.006G219300	-0.859	0.160522	-2.235	0.000139555	AT2G26290.1	ARSK1	root-specific kinase 1
Potri.006G221200	-0.697	0.342394	-1.569	0.00552335	AT3G13540.1	ATMYB5,MYB5	myb domain protein 5	MYB
Potri.006G221500	-0.721	0.245613	-1.224	0.0489189	AT5G35550.1	ATMYB123,ATTT2,MYB123,TT2	Duplicated homeodomain-like superfamily protein	MYB
Potri.006G223700	-0.007	0.999108	-1.568	0.00168693	AT5G51160.1		Ankyrin repeat family protein
Potri.006G228600	-0.324	0.930602	-1.314	0.0209707	AT5G11890.1
Potri.006G232900	-0.074	0.999108	-1.557	2.52092e-05	AT4G32940.1	GAMMA-VPE,GAMMAVPE	gamma vacuolar processing enzyme
Potri.006G239700	-0.693	0.243955	-1.156	0.0209142	AT2G25810.1	TIP4;1	tonoplast intrinsic protein 4;1
Potri.006G241400	-0.312	0.862683	-1.316	0.0139467	AT2G20740.1		Tetraspanin family protein
Potri.006G245900	-0.546	0.64584	-1.47	0.00836334	AT2G25680.1	MOT1	molybdate transporter 1
Potri.006G252200	-0.171	0.999108	-1.386	0.0406644	AT2G18660.1	PNP-A	plant natriuretic peptide A
Potri.006G257900	-0.349	0.842332	-1.144	0.0213164	AT1G80490.2	TPR1	TOPLESS-related 1
Potri.007G003000	-0.209	0.999108	-1.061	0.046617	AT3G13050.1		Major facilitator superfamily protein
Potri.007G010200	-0.454	0.490701	-1.034	0.00802823	AT5G65380.1		MATE efflux family protein
Potri.007G014600	-0.237	0.961421	-0.939	0.0329115	AT1G19910.1	ATVHA-C2,AVA-2PE,AVA-P2	ATPase, F0/V0 complex, subunit C protein
Potri.007G015500	-0.74	0.0709148	-1.717	3.9204e-06	AT4G38970.1	FBA2	fructose-bisphosphate aldolase 2
Potri.007G016400	-0.625	0.575541	-1.585	0.0314407	AT4G36220.1	CYP84A1,FAH1	ferulic acid 5-hydroxylase 1
Potri.007G019300	-0.745	0.21746	-4.224	3.18765e-17	AT5G66390.1		Peroxidase superfamily protein
Potri.007G022700	-0.266	0.899031	-1.02	0.00570629	AT2G18230.1	AtPPa2,PPa2	pyrophosphorylase 2
Potri.007G024000	-0.675	0.476551	-1.493	0.0314602	AT4G36600.1		Late embryogenesis abundant (LEA) protein
Potri.007G031500	0	0.999993	-1.202	0.0259799	AT4G36830.1	HOS3-1	GNS1/SUR4 membrane protein family
Potri.007G046100	-0.512	0.604117	-1.751	0.0103728	AT2G23360.1		Plant protein of unknown function (DUF869)
Potri.007G047600	-0.213	0.970254	-1.12	0.00557824	AT5G43060.1		Granulin repeat cysteine protease family protein
Potri.007G069600	0.11	0.999108	-0.835	0.0261301	AT5G37600.1	ATGLN1;1,ATGSR1,GLN1;1,GSR 1	glutamine synthase clone R1
Potri.007G070900	-0.431	0.82451	-1.23	0.0478646	AT1G56170.1	ATHAP5B,HAP5B,NF-YC2	nuclear factor Y, subunit C2	NF-YC
Potri.007G089200	-0.344	0.883802	-1.223	0.0246556	AT1G78020.1		Protein of unknown function (DUF581)
Potri.007G096400	-0.327	0.895982	-1.115	0.041212	AT4G33950.1	ATOST1,OST1,P44,SNRK2-6,SNRK2.6,SRK2E	Protein kinase superfamily protein
Potri.007G125100	-0.578	0.484471	-1.535	0.00497648	AT1G66920.2		Protein kinase superfamily protein
Potri.007G125200	-0.705	0.421046	-1.679	0.013205	AT1G67000.1		Protein kinase superfamily protein
Potri.007G125400	-0.261	0.946646	-1.034	0.013658	AT1G66980.1	SNC4	suppressor of npr1-1 constitutive 4
Potri.007G125500	-0.449	0.721155	-0.985	0.0408398	AT1G66940.1		protein kinase-related
Potri.007G125600	-0.467	0.62476	-1.844	7.41464e-06	AT1G66920.1		Protein kinase superfamily protein
Potri.007G125800	-0.612	0.544535	-1.454	0.019899	AT1G67000.1		Protein kinase superfamily protein
Potri.007G125900	-0.644	0.277379	-1.531	0.000489756	AT1G66920.2		Protein kinase superfamily protein
Potri.007G126200	-0.329	0.868192	-1.923	4.70306e-07	AT5G38260.1		Protein kinase superfamily protein
Potri.007G143200	-0.242	0.999108	-1.752	0.00881073	AT5G36930.2		Disease resistance protein (TIR-NBS-LRR class) family
Potri.008G012400	-0.824	0.156322	-1.276	0.0403254	AT5G06390.1	FLA17	FASCICLIN-like arabinogalactan protein 17 precursor
Potri.008G015700	-0.452	0.634959	-1.157	0.0135077	AT3G11760.1
Potri.008G021400	-0.488	0.477195	-1.437	0.000193866	AT2G36290.1		alpha/beta-Hydrolases superfamily protein
Potri.008G026100	-0.082	0.999108	-1.441	0.0233544	AT3G57810.2		Cysteine proteinases superfamily protein
Potri.008G029700	-0.783	0.0582579	-1.308	0.000943133	AT2G36690.1		2-oxoglutarate (2OG) and Fe(II)-dependent oxygenase superfamily protein
Potri.008G038200	-0.297	0.891389	-1.825	7.88324e-08	AT2G37040.1	ATPAL1,PAL1	PHE ammonia lyase 1
Potri.008G039300	-0.727	0.130864	-1.241	0.00460757	AT2G39000.1		Acyl-CoA N-acyltransferases (NAT) superfamily protein
Potri.008G055800	-1.008	0.0767288	-1.439	0.0287692	AT3G55420.1
Potri.008G065600	-0.639	0.189796	-1.834	1.73703e-06	AT4G00430.1	PIP1;4,PIP1E,TMP-C	plasma membrane intrinsic protein 1;4
Potri.008G069100	-0.258	0.924006	-1.283	0.0226568	AT2G40130.2		Double Clp-N motif-containing P-loop nucleoside triphosphate hydrolases superfamily protein
Potri.008G073700	-0.883	0.197029	-2.902	1.03797e-06	AT2G40370.1	LAC5	laccase 5
Potri.008G073800	-0.141	0.999108	-2.223	2.56127e-06	AT5G05390.1	LAC12	laccase 12
Potri.008G076300	-0.198	0.999108	-0.923	0.0445192	AT3G03310.1	ATLCAT3,LCAT3	lecithin:cholesterol acyltransferase 3
Potri.008G092700	-0.772	0.331983	-1.911	0.00414029	AT2G03360.1		Glycosyltransferase family 61 protein
Potri.008G094700	-0.629	0.374489	-1.904	0.00328847	AT3G27960.1		Tetratricopeptide repeat (TPR)-like superfamily protein
Potri.008G112300	-0.55	0.49651	-2.457	7.4941e-05	AT1G13635.1		DNA glycosylase superfamily protein
Potri.008G116500	-0.433	0.633392	-1.821	0.000286489	AT1G75290.1		NAD(P)-binding Rossmann-fold superfamily protein
Potri.008G131500	-0.423	0.643804	-1.234	0.00849723	AT1G70790.1		Calcium-dependent lipid-binding (CaLB domain) family protein
Potri.008G148400	-0.322	0.92729	-1.326	0.018427	AT2G02820.2	AtMYB88,MYB88	myb domain protein 88	MYB
Potri.008G157400	-0.384	0.737218	-1.221	0.0056702	AT5G43850.1	ARD4,ATARD4	RmlC-like cupins superfamily protein
Potri.008G171000	-0.625	0.285393	-1.155	0.00819924	AT2G05620.1	PGR5	proton gradient regulation 5
Potri.008G174900	0.067	0.999108	-1.266	0.0258691	AT2G29420.1	ATGSTU7,GST25,GSTU7	glutathione S-transferase tau 7
Potri.008G186100	0.066	0.999108	-0.895	0.041212	AT1G67900.1		Phototropic-responsive NPH3 family protein
Potri.008G188900	-0.121	0.999108	-0.818	0.0429459	AT1G60810.1	ACLA-2	ATP-citrate lyase A-2
Potri.008G191800	-0.408	0.594123	-1.071	0.00378362	AT1G70000.1		myb-like transcription factor family protein	MYB_related
Potri.008G194800	-0.715	0.0815961	-1.04	0.0282411	AT1G07040.1
Potri.008G195000	-0.548	0.53855	-1.356	0.0103728	AT3G06035.1		Glycoprotein membrane precursor GPI-anchored
Potri.008G198100	-0.955	0.116686	-1.635	0.0288983	AT3G21530.1		DNAse I-like superfamily protein
Potri.008G201600	-0.943	0.113776	-1.39	0.0481092	AT3G23590.1	MED33A,RFR1	REF4-related 1
Potri.008G205000	-0.753	0.0830714	-1.387	0.0102444	AT4G15610.1		Uncharacterised protein family (UPF0497)
Potri.009G006000	0.571	0.572622	-1.459	0.0345304	AT5G22930.1		Protein of unknown function (DUF1635)
Potri.009G006600	-0.424	0.879289	-2.166	0.000347029	AT2G36870.1	XTH32	xyloglucan endotransglucosylase/hydrolase 32
Potri.009G010400	-0.856	0.120972	-1.978	0.000100254	AT2G28250.1	NCRK	Protein kinase superfamily protein
Potri.009G022500	-0.849	0.0815961	-1.544	0.00108991	AT2G44500.1		O-fucosyltransferase family protein
Potri.009G024700	-1.012	0.05779	-1.831	0.00875307	AT2G31930.1
Potri.009G039200	-0.374	0.903036	-1.758	0.00407872	AT1G07400.1		HSP20-like chaperones superfamily protein
Potri.009G042500	-0.417	0.657766	-2.757	4.07413e-06	AT2G38080.1	ATLMCO4,IRX12,LAC4,LMCO4	Laccase/Diphenol oxidase family protein
Potri.009G051100	-0.479	0.641021	-1.79	6.07605e-06
Potri.009G083100	0.395	0.887442	-1.483	0.0254495	AT4G33720.1		CAP (Cysteine-rich secretory proteins, Antigen 5, and Pathogenesis-related 1 protein) superfamily protein
Potri.009G083300	0.214	0.999108	-1.592	0.00849723	AT4G33720.1		CAP (Cysteine-rich secretory proteins, Antigen 5, and Pathogenesis-related 1 protein) superfamily protein
Potri.009G084800	-0.76	0.0692103	-0.948	0.0142563	AT1G50020.1
Potri.009G092300	-0.735	0.25551	-3.278	1.14341e-15	AT4G37450.1	AGP18,ATAGP18	arabinogalactan protein 18
Potri.009G094100	-0.173	0.999108	-1.311	0.0147442	AT2G15020.1
Potri.009G095400	-0.593	0.269105	-1.451	0.000837348	AT4G15480.1	UGT84A1	UDP-Glycosyltransferase superfamily protein
Potri.009G095800	-0.598	0.436218	-1.67	0.000586485	AT3G19450.1	ATCAD4,CAD,CAD-C,CAD4	GroES-like zinc-binding alcohol dehydrogenase family protein
Potri.009G101200	-0.68	0.221021	-1.11	0.0287842	AT1G45249.1	ABF2,AREB1,ATAREB1	abscisic acid responsive elements-binding factor 2	bZIP
Potri.009G104900	-0.202	0.999108	-1.362	0.00761564	AT1G47480.1		alpha/beta-Hydrolases superfamily protein
Potri.009G107600	-0.442	0.725784	-1.286	0.00613486	AT3G19000.1		2-oxoglutarate (2OG) and Fe(II)-dependent oxygenase superfamily protein
Potri.009G113600	0.089	0.999108	-0.974	0.0292162	AT3G18830.1	ATPLT5,ATPMT5,PMT5	polyol/monosaccharide transporter 5
Potri.009G124400	-0.363	0.809435	-1.1	0.0189248	AT4G38960.1		B-box type zinc finger family protein	DBB
Potri.009G146500	-0.595	0.55747	-1.681	0.00325507	AT3G44610.1		Protein kinase superfamily protein
Potri.009G148800	-0.204	0.999108	-1.283	0.0466049	AT1G08250.1	ADT6	arogenate dehydratase 6
Potri.009G157600	-0.629	0.509969	-1.502	0.00922314	AT5G28490.1	LSH1	Protein of unknown function (DUF640)
Potri.009G163900	0.19	0.999108	-1.586	0.0199057	AT3G52740.1
Potri.010G042000	-0.696	0.0908331	-1.049	0.0105653	AT1G60470.1	AtGolS4,GolS4	galactinol synthase 4
Potri.010G050900	-0.132	0.999108	-1.289	0.012412	AT1G24530.1		Transducin/WD40 repeat-like superfamily protein
Potri.010G055400	-0.051	0.999108	-1.224	0.00119213	AT3G04120.1	GAPC,GAPC-1,GAPC1	glyceraldehyde-3-phosphate dehydrogenase C subunit 1
Potri.010G056600	0.067	0.999108	-1.002	0.041212	AT1G67600.1		Acid phosphatase/vanadium-dependent haloperoxidase-related protein
Potri.010G069100	-0.061	0.999108	-1.054	0.020978	AT3G23410.1	ATFAO3,FAO3	fatty alcohol oxidase 3
Potri.010G074800	-0.221	0.960875	-0.897	0.0183821	AT4G24000.1	ATCSLG2,CSLG2	cellulose synthase like G2
Potri.010G088000	-0.162	0.999108	-0.852	0.0498607	AT4G14930.1		Survival protein SurE-like phosphatase/nucleotidase
Potri.010G108100	-1.067	0.0582579	-2.308	8.1367e-05	AT2G01660.1	PDLP6	plasmodesmata-located protein 6
Potri.010G109400	-0.472	0.777516	-1.184	0.0216772	AT1G23200.1		Plant invertase/pectin methylesterase inhibitor superfamily
Potri.010G129800	-0.145	0.999108	-2.124	3.48153e-05	AT1G75290.1		NAD(P)-binding Rossmann-fold superfamily protein
Potri.010G141600	-0.645	0.425217	-3.284	4.90666e-12	AT3G16920.1	ATCTL2,CTL2	chitinase-like protein 2
Potri.010G151700	-0.896	0.0695463	-1.265	0.0199372	AT5G54940.1		Translation initiation factor SUI1 family protein
Potri.010G155200	-0.718	0.297041	-1.332	0.0225635	AT1G53430.1		Leucine-rich repeat transmembrane protein kinase
Potri.010G155600	-1.033	0.0657011	-2.305	5.96162e-05	AT1G53440.1		Leucine-rich repeat transmembrane protein kinase
Potri.010G174200	-0.738	0.374006	-1.676	0.0160124	AT1G79420.1		Protein of unknown function (DUF620)
Potri.010G174400	-0.018	0.999108	-1.456	0.00129821	AT1G16390.1	3-Oct,ATOCT3	organic cation/carnitine transporter 3
Potri.010G179700	-0.225	0.999108	-2.461	3.23511e-06	AT1G65480.1	FT	PEBP (phosphatidylethanolamine-binding protein) family protein
Potri.010G182600	-0.318	0.871113	-1.188	0.00216746	AT5G49690.1		UDP-Glycosyltransferase superfamily protein
Potri.010G182700	-0.427	0.70743	-2.565	3.028e-10	AT5G05365.1		Heavy metal transport/detoxification superfamily protein
Potri.010G184000	-0.689	0.374489	-3.008	1.67818e-09	AT2G40320.1	TBL33	TRICHOME BIREFRINGENCE-LIKE 33
Potri.010G188200	-0.102	0.999108	-1.356	0.0139486	AT2G40130.2		Double Clp-N motif-containing P-loop nucleoside triphosphate hydrolases superfamily protein
Potri.010G191900	-0.672	0.130807	-1.107	0.00228737	AT4G00430.1	PIP1;4,PIP1E,TMP-C	plasma membrane intrinsic protein 1;4
Potri.010G206600	-0.65	0.424633	-1.579	0.00525286	AT3G12580.1	ATHSP70,HSP70	heat shock protein 70
Potri.010G213000	0.006	0.999108	-1.347	0.0162927	AT3G55120.1	A11,CFI,TT5	Chalcone-flavanone isomerase family protein
Potri.010G216200	-0.281	0.899031	-1.495	0.000886395	AT2G28550.3	RAP2.7,TOE1	related to AP2.7	AP2
Potri.010G221600	-0.3	0.859944	-0.848	0.0326362	AT1G48850.1	EMB1144	chorismate synthase, putative / 5-enolpyruvylshikimate-3-phosphate phospholyase, putative
Potri.010G224200	-0.89	0.190079	-1.685	0.0168115	AT2G37040.1	ATPAL1,PAL1	PHE ammonia lyase 1
Potri.010G237700	-0.963	0.0882282	-1.534	0.00971915	AT1G74300.1		alpha/beta-Hydrolases superfamily protein
Potri.010G244900	-0.799	0.0932841	-1.44	0.00696852	AT5G06390.1	FLA17	FASCICLIN-like arabinogalactan protein 17 precursor
Potri.010G245200	0.322	0.956762	-1.543	0.0421064	AT5G16010.1		3-oxo-5-alpha-steroid 4-dehydrogenase family protein
Potri.010G251700	-0.634	0.195057	-1.061	0.00691222	AT1G51580.1		RNA-binding KH domain-containing protein
Potri.010G252200	-0.746	0.0706736	-1.031	0.00842387	AT1G51550.1		Kelch repeat-containing F-box family protein
Potri.010G253300	-0.782	0.285263	-1.588	0.0152797	AT1G50430.1	7RED,DWF5,LE,PA,ST7R	Ergosterol biosynthesis ERG4/ERG24 family
Potri.010G254900	-0.506	0.430874	-1.149	0.00499112	AT5G08570.1		Pyruvate kinase family protein
Potri.011G003300	-0.736	0.0839981	-1.066	0.0318533	AT1G11700.1		Protein of unknown function, DUF584
Potri.011G025200	-0.306	0.861512	-1.356	0.000272074	AT5G54770.1	THI1,THI4,TZ	thiazole biosynthetic enzyme, chloroplast (ARA6) (THI1) (THI4)
Potri.011G039200	0.002	0.999216	-1.305	0.037879	AT1G11330.1		S-locus lectin protein kinase family protein
Potri.011G047200	-0.149	0.999108	-1.409	0.0007335
Potri.011G063800	0.23	0.984436	-1.005	0.033727	AT5G45920.1		SGNH hydrolase-type esterase superfamily protein
Potri.011G068300	-0.757	0.226557	-2.589	2.64507e-06	AT1G29200.2		O-fucosyltransferase family protein
Potri.011G069600	-0.789	0.264249	-2.418	1.62161e-06	AT4G18780.1	ATCESA8,CESA8,IRX1,LEW2	cellulose synthase family protein
Potri.011G087200	-0.06	0.999108	-1.159	0.00154604	AT4G26850.1	VTC2	mannose-1-phosphate guanylyltransferase (GDP)s;GDP-galactose:mannose-1-phosphate guanylyltransferases;GDP-galactose:glucose-1-phosphate guanylyltransferases;GDP-galactose:myoinositol-1-phosphate guanylyltransferases;glucose-1-phosphate guanylyltransferase
Potri.011G094800	-0.66	0.324175	-2.673	4.03534e-06	AT5G55970.1		RING/U-box superfamily protein
Potri.011G096500	-0.601	0.383127	-3.054	7.81484e-08	AT3G15050.1	IQD10	IQ-domain 10
Potri.011G108900	-0.332	0.863396	-1.272	0.000586571	AT1G78780.2		pathogenesis-related family protein
Potri.011G113200	0.153	0.999108	-1.397	0.0231823	AT1G78320.1	ATGSTU23,GSTU23	glutathione S-transferase TAU 23
Potri.011G113400	-0.114	0.999108	-1.698	0.000176793	AT1G17170.1	ATGSTU24,GST,GSTU24	glutathione S-transferase TAU 24
Potri.011G120200	-0.4	0.723271	-1.522	0.038191	AT5G60020.1	ATLAC17,LAC17	laccase 17
Potri.011G120300	-0.506	0.575541	-1.837	0.00830463	AT5G60020.1	ATLAC17,LAC17	laccase 17
Potri.011G122700	-0.691	0.122544	-1.336	0.00207883	AT1G61065.1		Protein of unknown function (DUF1218)
Potri.011G129400	-0.159	0.999108	-1.096	0.00153614	AT4G27270.1		Quinone reductase family protein
Potri.011G129900	-0.133	0.999108	-1.57	0.00854563	AT5G54530.1		Protein of unknown function, DUF538
Potri.011G132600	-0.379	0.697676	-2.904	1.03885e-06	AT5G54690.1	GAUT12,IRX8,LGT6	galacturonosyltransferase 12
Potri.011G140800	-0.539	0.214807	-1.039	0.00209355	AT1G78380.1	ATGSTU19,GST8,GSTU19	glutathione S-transferase TAU 19
Potri.011G142700	-0.194	0.999108	-1.373	0.00336545	AT3G12920.1		SBP (S-ribonuclease binding protein) family protein
Potri.011G151200	0.036	0.999108	-1.419	0.00136291	AT1G32960.1	ATSBT3.3,SBT3.3	Subtilase family protein
Potri.011G153300	-0.543	0.541403	-2.877	5.72334e-07	AT2G46770.1	ANAC043,EMB2301,NST1	NAC (No Apical Meristem) domain transcriptional regulator superfamily protein	NAC
Potri.011G168200	-0.244	0.946646	-0.888	0.0321676	AT5G41700.1	ATUBC8,UBC8	ubiquitin conjugating enzyme 8
Potri.012G001500	0.162	0.999108	-0.978	0.0330983	AT3G22370.1	AOX1A,ATAOX1A	alternative oxidase 1A
Potri.012G006400	-0.466	0.767679	-1.547	0.0457903	AT5G54160.1	ATOMT1,OMT1	O-methyltransferase 1
Potri.012G032700	0.113	0.999108	-1.117	0.0041363	AT1G74100.1	ATSOT16,ATST5A,CORI-7,SOT16	sulfotransferase 16
Potri.012G069300	-0.475	0.476551	-0.936	0.0483162	AT1G74520.1	ATHVA22A,HVA22A	HVA22 homologue A
Potri.012G075600	-0.272	0.954474	-1.122	0.0155718	AT1G74920.1	ALDH10A8	aldehyde dehydrogenase 10A8
Potri.012G084100	-0.587	0.440835	-1.1	0.0385063	AT5G26660.1	ATMYB86,MYB86	myb domain protein 86	MYB
Potri.012G087700	0.022	0.999108	-1.788	0.0100952	AT1G12940.1	ATNRT2.5,NRT2.5	nitrate transporter2.5
Potri.012G089900	-0.145	0.999108	-1.597	0.0051647	AT3G48280.1	CYP71A25	cytochrome P450, family 71, subfamily A, polypeptide 25
Potri.012G090000	-0.289	0.954474	-1.275	0.0143602	AT3G26330.1	CYP71B37	cytochrome P450, family 71, subfamily B, polypeptide 37
Potri.012G114600	-0.303	0.969999	-2.079	5.62778e-05	AT2G44740.1	CYCP4;1	cyclin p4;1
Potri.012G123700	-0.864	0.116686	-1.723	0.00129143	AT2G35120.1		Single hybrid motif superfamily protein
Potri.012G129100	-0.301	0.949148	-1.388	0.00579036	AT1G12380.1
Potri.013G005800	-0.256	0.999108	-1.255	0.037879	AT1G56600.1	AtGolS2,GolS2	galactinol synthase 2
Potri.013G005900	-0.659	0.144509	-1.003	0.0198034	AT1G56600.1	AtGolS2,GolS2	galactinol synthase 2
Potri.013G007000	-0.433	0.656102	-1.003	0.0427125	AT1G56580.1	SVB	Protein of unknown function, DUF538
Potri.013G023500	-0.082	0.999108	-1.816	0.00405455
Potri.013G028700	-0.674	0.102381	-0.934	0.0255349	AT5G27320.1	ATGID1C,GID1C	alpha/beta-Hydrolases superfamily protein
Potri.013G041000	-0.566	0.641918	-2.003	0.00071882	AT4G02590.1	UNE12	basic helix-loop-helix (bHLH) DNA-binding superfamily protein	bHLH
Potri.013G073500	-0.63	0.252234	-1.576	5.25426e-05	AT3G03550.1		RING/U-box superfamily protein
Potri.013G074300	-0.379	0.73614	-1.188	0.00111372	AT5G17540.1		HXXXD-type acyl-transferase family protein
Potri.013G082500	0.225	0.991212	-0.961	0.0429459	AT5G16880.1		Target of Myb protein 1
Potri.013G105900	-0.441	0.53855	-0.836	0.0423462	AT1G72160.1		Sec14p-like phosphatidylinositol transfer family protein
Potri.013G115800	-0.149	0.999108	-1.086	0.04802	AT1G34300.1		lectin protein kinase family protein
Potri.013G127200	-0.882	0.0915791	-1.256	0.028119	AT3G59690.1	IQD13	IQ-domain 13
Potri.013G131200	-0.592	0.172692	-1.594	0.000265213	AT3G09390.1	ATMT-1,ATMT-K,MT2A	metallothionein 2A
Potri.013G134900	-0.519	0.459289	-1.337	0.000990422	AT4G02340.1		alpha/beta-Hydrolases superfamily protein
Potri.013G150500	-0.689	0.102299	-1.349	0.000106995	AT5G54470.1		B-box type zinc finger family protein
Potri.013G156300	-0.383	0.847722	-1.442	0.00696852
Potri.013G157900	-0.589	0.411709	-1.809	4.27208e-05	AT2G30490.1	ATC4H,C4H,CYP73A5,REF3	cinnamate-4-hydroxylase
Potri.014G016400	-0.462	0.766013	-1.558	0.0073953	AT3G01400.1		ARM repeat superfamily protein
Potri.014G019200	0.214	0.999108	-1.517	0.00875307	AT5G48810.1	ATB5-B,ATCB5-D,B5 #3,CB5-D	cytochrome B5 isoform D
Potri.014G024100	-0.305	0.859367	-0.949	0.0051647	AT5G43060.1		Granulin repeat cysteine protease family protein
Potri.014G032300	-0.251	0.959674	-0.919	0.030487	AT1G47410.1
Potri.014G032800	0.083	0.999108	-1.22	0.00881051	AT1G47480.1		alpha/beta-Hydrolases superfamily protein
Potri.014G039000	-0.528	0.481915	-2.82	2.03807e-12	AT4G19390.1		Uncharacterised protein family (UPF0114)
Potri.014G053500	-0.437	0.617032	-0.924	0.0350848	AT5G45290.1		RING/U-box superfamily protein
Potri.014G058200	-0.801	0.291158	-3.094	7.9853e-08	AT2G45040.1		Matrixin family protein
Potri.014G073100	-0.623	0.545731	-1.449	0.032782	AT2G45600.1		alpha/beta-Hydrolases superfamily protein
Potri.014G073200	-0.173	0.999108	-1.536	0.0354769	AT2G45600.1		alpha/beta-Hydrolases superfamily protein
Potri.014G078000	-0.779	0.0547603	-1.43	0.00809099	AT4G22990.2		Major Facilitator Superfamily with SPX (SYG1/Pho81/XPR1) domain-containing protein
Potri.014G081700	-0.163	0.999108	-1.554	4.18079e-05	AT4G11610.1		C2 calcium/lipid-binding plant phosphoribosyltransferase family protein
Potri.014G092300	-0.819	0.0865242	-1.231	0.0135694	AT2G46225.1	ABIL1	ABI-1-like 1
Potri.014G095500	-0.411	0.773105	-1.309	0.00725448	AT2G46370.4	FIN219,JAR1	Auxin-responsive GH3 family protein
Potri.014G100800	-0.57	0.659161	-2.118	0.000738116	AT2G16720.1	ATMYB7,ATY49,MYB7	myb domain protein 7	MYB
Potri.014G100900	-0.428	0.726486	-1.294	0.00939529	AT3G61850.1	DAG1	Dof-type zinc finger DNA-binding family protein	Dof
Potri.014G101700	-0.175	0.999108	-2.247	1.8345e-09	AT2G46600.1		Calcium-binding EF-hand family protein
Potri.014G104800	-0.511	0.744988	-3.06	8.45032e-08	AT2G46770.1	ANAC043,EMB2301,NST1	NAC (No Apical Meristem) domain transcriptional regulator superfamily protein	NAC
Potri.014G114700	-0.737	0.207073	-1.299	0.0146392	AT4G01850.1	AtSAM2,MAT2,SAM-2,SAM2	S-adenosylmethionine synthetase 2
Potri.014G129200	0.089	0.999108	-1.125	0.00133424	AT3G62830.1	ATUXS2,AUD1,UXS2	NAD(P)-binding Rossmann-fold superfamily protein
Potri.014G134600	-0.387	0.918246	-1.457	0.0446837	AT2G47890.1		B-box type zinc finger protein with CCT domain	DBB
Potri.014G145100	0.336	0.899778	-1.617	0.00417087	AT5G13930.1	ATCHS,CHS,TT4	Chalcone and stilbene synthase family protein
Potri.014G149400	-0.622	0.397447	-1.213	0.0235843	AT5G48570.1	ATFKBP65,FKBP65,ROF2	FKBP-type peptidyl-prolyl cis-trans isomerase family protein
Potri.014G149800	-0.636	0.280866	-1.761	6.43556e-06	AT2G43060.1	IBH1	ILI1 binding bHLH 1
Potri.014G153900	-0.424	0.853015	-1.404	0.0250276	AT1G19020.1
Potri.014G162900	-0.741	0.337676	-1.541	0.0189662	AT2G04780.1	FLA7	FASCICLIN-like arabinoogalactan 7
Potri.014G168400	0.117	0.999108	-1.451	0.0457762	AT5G47650.1	ATNUDT2,ATNUDX2,NUDT2	nudix hydrolase homolog 2
Potri.014G168700	-0.203	0.990612	-0.84	0.046601	AT5G48230.2	ACAT2,EMB1276	acetoacetyl-CoA thiolase 2
Potri.015G005400	-0.682	0.10184	-0.825	0.0271808	AT3G49390.1	CID10	CTC-interacting domain 10
Potri.015G027700	-0.291	0.95434	-1.293	0.0226613	AT3G16520.3	UGT88A1	UDP-glucosyl transferase 88A1
Potri.015G031400	0.163	0.999108	-1.752	1.02668e-06	AT3G17790.1	ATACP5,ATPAP17,PAP17	purple acid phosphatase 17
Potri.015G034700	-0.378	0.817286	-2.032	5.47519e-07	AT5G37600.1	ATGLN1;1,ATGSR1,GLN1;1,GSR 1	glutamine synthase clone R1
Potri.015G034800	-0.299	0.960875	-1.598	0.0130542	AT1G67920.1
Potri.015G040400	0.562	0.604117	-1.983	0.00172865	AT1G18140.1	ATLAC1,LAC1	laccase 1
Potri.015G040600	-0.01	0.999108	-1.733	0.0166506	AT1G18140.1	ATLAC1,LAC1	laccase 1
Potri.015G040700	0.306	0.982611	-1.928	0.00539606	AT1G18140.1	ATLAC1,LAC1	laccase 1
Potri.015G040800	0.085	0.999108	-2.066	0.00215089	AT1G18140.1	ATLAC1,LAC1	laccase 1
Potri.015G060100	-0.566	0.568465	-2.564	7.66685e-07	AT5G15630.1	COBL4,IRX6	COBRA-like extracellular glycosyl-phosphatidyl inositol-anchored protein family
Potri.015G060900	-0.411	0.844952	-1.411	0.010028	AT5G61340.1
Potri.015G069200	-0.583	0.445898	-1.201	0.0406644	AT5G62580.1		ARM repeat superfamily protein
Potri.015G081300	-0.073	0.999108	-1.367	7.38911e-06	AT1G12940.1	ATNRT2.5,NRT2.5	nitrate transporter2.5
Potri.015G081500	0.053	0.999108	-1.31	0.00721769	AT1G12940.1	ATNRT2.5,NRT2.5	nitrate transporter2.5
Potri.015G085000	-0.204	0.999108	-2.82	4.1164e-12	AT5G50200.1	ATNRT3.1,NRT3.1,WR3	nitrate transmembrane transporters
Potri.015G085100	0.011	0.999108	-2.25	4.97107e-11	AT5G50200.1	ATNRT3.1,NRT3.1,WR3	nitrate transmembrane transporters
Potri.015G096900	-1.044	0.070253	-2.887	3.89214e-07	AT4G24910.1		Protein of unknown function (DUF579)
Potri.015G097000	-0.829	0.248442	-1.747	0.00830806	AT4G37100.1		Pyridoxal phosphate (PLP)-dependent transferases superfamily protein
Potri.015G098400	-0.699	0.0674679	-1.385	9.0256e-05	AT4G22950.1	AGL19,GL19	AGAMOUS-like 19	MIKC
Potri.015G103800	-0.451	0.617032	-1.155	0.0387786	AT5G23670.1	LCB2	long chain base2
Potri.015G122900	-0.849	0.22243	-1.858	0.00836334	AT4G08850.1		Leucine-rich repeat receptor-like protein kinase family protein
Potri.015G123400	-0.868	0.211496	-1.7	0.0147442	AT4G08850.1		Leucine-rich repeat receptor-like protein kinase family protein
Potri.015G124400	-1.028	0.082408	-1.531	0.0350848	AT4G08850.1		Leucine-rich repeat receptor-like protein kinase family protein
Potri.015G129400	-0.705	0.322815	-4.22	7.08175e-19	AT5G03170.1	ATFLA11,FLA11	FASCICLIN-like arabinogalactan-protein 11
Potri.015G146400	-0.055	0.999108	-1.416	0.0127147	AT5G52420.1
Potri.015G147600	-0.331	0.821152	-1.203	0.011086	AT4G25640.1	ATDTX35,DTX35,FFT	detoxifying efflux carrier 35
Potri.016G006700	-0.546	0.40648	-0.983	0.0443523	AT4G16380.1		Heavy metal transport/detoxification superfamily protein
Potri.016G010900	-0.956	0.11704	-1.755	0.0151133	AT5G47530.1		Auxin-responsive family protein
Potri.016G016500	-0.381	0.836177	-1.652	0.000521022	AT3G21790.1		UDP-Glycosyltransferase superfamily protein
Potri.016G016900	-0.216	0.985689	-1.247	0.00166729	AT3G21750.1	UGT71B1	UDP-glucosyl transferase 71B1
Potri.016G026300	-0.189	0.999108	-1.33	0.0227166	AT3G42170.1		BED zinc finger ;hAT family dimerisation domain	GRAS
Potri.016G031400	-0.808	0.222765	-3.402	1.78731e-13	AT5G07050.1		nodulin MtN21 /EamA-like transporter family protein
Potri.016G051900	-0.5	0.497989	-1.025	0.0282411	AT3G44200.1	ATNEK6,IBO1,NEK6	NIMA (never in mitosis, gene A)-related 6
Potri.016G054400	-0.409	0.641371	-1.315	0.000916397	AT3G57540.1		Remorin family protein
Potri.016G055300	-0.076	0.999108	-1.156	0.0132949	AT2G34690.1	ACD11	Glycolipid transfer protein (GLTP) family protein
Potri.016G057400	-0.028	0.999108	-1.08	0.0470614	AT3G57270.1	BG1	beta-1,3-glucanase 1
Potri.016G062700	-0.771	0.1258	-2.202	7.32836e-05	AT3G24420.1		alpha/beta-Hydrolases superfamily protein
Potri.016G065000	-0.712	0.114581	-0.953	0.0491832	AT5G06570.1		alpha/beta-Hydrolases superfamily protein
Potri.016G065300	-0.365	0.865332	-1.249	0.00943948	AT4G37980.1	ATCAD7,CAD7,ELI3,ELI3-1	elicitor-activated gene 3-1
Potri.016G068200	-0.77	0.118506	-1.198	0.0237496	AT5G06510.1	NF-YA10	nuclear factor Y, subunit A10	NF-YA
Potri.016G072600	-0.362	0.903036	-1.833	0.000290811	AT2G36020.1	HVA22J	HVA22-like protein J
Potri.016G079500	-0.322	0.918074	-1.166	0.0363564	AT3G52710.1
Potri.016G084800	-0.164	0.999108	-0.985	0.0127198	AT3G09640.1	APX1B,APX2	ascorbate peroxidase 2
Potri.016G088700	-0.498	0.669489	-2.789	3.45028e-07	AT5G03170.1	ATFLA11,FLA11	FASCICLIN-like arabinogalactan-protein 11
Potri.016G091100	-0.29	0.945866	-1.404	0.00939529	AT2G37040.1	ATPAL1,PAL1	PHE ammonia lyase 1
Potri.016G101700	-0.483	0.739624	-1.552	0.0162927	AT3G53830.1		Regulator of chromosome condensation (RCC1) family protein
Potri.016G108800	0.396	0.846362	-1.367	0.0199263	AT3G54040.1		PAR1 protein
Potri.016G111000	-0.273	0.996351	-2.342	0.000113191	AT2G38060.1	PHT4;2	phosphate transporter 4;2
Potri.016G116400	-0.055	0.999108	-1.325	0.0476632	AT5G01410.1	ATPDX1,ATPDX1.3,PDX1,PDX1.3,RSR4	Aldolase-type TIM barrel family protein
Potri.016G126400	-0.139	0.999108	-0.991	0.0279812	AT2G38360.1	PRA1.B4	prenylated RAB acceptor 1.B4
Potri.016G144100	-0.645	0.346822	-2.136	0.000620086	AT1G79620.1		Leucine-rich repeat protein kinase family protein
Potri.017G009500	-0.03	0.999108	-1.16	0.00460757	AT5G38260.1		Protein kinase superfamily protein
Potri.017G016000	-0.639	0.416583	-1.319	0.0246512	AT2G20560.1		DNAJ heat shock family protein
Potri.017G029000	-0.674	0.340488	-2.262	0.000101661	AT3G59480.1		pfkB-like carbohydrate kinase family protein
Potri.017G053200	-0.807	0.0729396	-1.742	5.43718e-06	AT5G64230.1
Potri.017G059300	-0.793	0.133478	-1.549	0.00157509	AT4G13930.1	SHM4	serine hydroxymethyltransferase 4
Potri.017G076800	-0.6	0.269105	-1.182	0.00828992	AT5G62680.1		Major facilitator superfamily protein
Potri.017G083200	-0.714	0.102817	-1.086	0.0266897	AT5G48600.2	ATCAP-C,ATSMC3,ATSMC4,SMC3	structural maintenance of chromosome 3
Potri.017G084800	0.032	0.999108	-1.263	0.0417453	AT5G39670.1		Calcium-binding EF-hand family protein
Potri.017G086500	-0.087	0.999108	-0.793	0.0452327	AT3G01120.1	ATCYS1,CGS,CGS1,MTO1	Pyridoxal phosphate (PLP)-dependent transferases superfamily protein
Potri.017G089900	-0.815	0.184923	-1.374	0.015032	AT5G15410.2	ATCNGC2,CNGC2,DND1	Cyclic nucleotide-regulated ion channel family protein
Potri.017G092000	0.014	0.999108	-0.924	0.0312738	AT3G29360.1		UDP-glucose 6-dehydrogenase family protein
Potri.017G100000	-0.539	0.342844	-0.874	0.0359007	AT5G38900.1		Thioredoxin superfamily protein
Potri.017G111100	-0.464	0.570309	-2.167	1.28013e-06
Potri.017G130600	-1.072	0.052649	-1.735	0.00585742	AT1G48480.1	RKL1	receptor-like kinase 1
Potri.017G145700	-0.257	0.976286	-1.442	0.0107994	AT4G25700.1	B1,BCH1,BETA-OHASE 1,chy1	beta-hydroxylase 1
Potri.018G000900	-0.252	0.999108	-1.873	0.00193375	AT4G31140.1		O-Glycosyl hydrolases family 17 protein
Potri.018G010700	-0.248	0.999108	-1.869	0.00725448	AT2G29120.1	ATGLR2.7,GLR2.7	glutamate receptor 2.7
Potri.018G015700	-0.167	0.999108	-0.936	0.0318984	AT2G24820.1	TIC55-II	translocon at the inner envelope membrane of chloroplasts 55-II
Potri.018G026900	-0.074	0.999108	-1.126	0.00881941	AT2G25430.1		epsin N-terminal homology (ENTH) domain-containing protein / clathrin assembly protein-related
Potri.018G036700	0.092	0.999108	-1.272	2.73955e-05	AT5G25610.1	ATRD22,RD22	BURP domain-containing protein
Potri.018G063500	-0.625	0.427282	-1.61	0.00228737	AT3G43190.1	ATSUS4,SUS4	sucrose synthase 4
Potri.018G075000	-0.052	0.999108	-1.041	0.0258691	AT3G24503.1	ALDH1A,ALDH2C4,REF1	aldehyde dehydrogenase 2C4
Potri.018G079200	-0.365	0.793485	-0.99	0.0101009	AT1G67910.1
Potri.018G090100	-0.059	0.999108	-0.997	0.0222545	AT2G36460.1		Aldolase superfamily protein
Potri.018G092100	-0.404	0.575924	-1.077	0.00809099	AT4G30210.1	AR2,ATR2	P450 reductase 2
Potri.018G103900	-0.623	0.45953	-1.721	0.00513669	AT5G17420.1	ATCESA7,CESA7,IRX3,MUR10	Cellulose synthase family protein
Potri.018G115100	-0.251	0.960875	-1.033	0.0143302	AT2G25620.1	AtDBP1,DBP1	DNA-binding protein phosphatase 1
Potri.018G127700	0.234	0.999108	-1.515	0.0323307	AT5G52600.1	AtMYB82,MYB82	myb domain protein 82	MYB
Potri.018G131500	0.023	0.999108	-1.02	0.0383807	AT2G26660.1	ATSPX2,SPX2	SPX domain gene 2
Potri.018G141700	-0.106	0.999108	-1.128	0.0408398	AT5G57150.1		basic helix-loop-helix (bHLH) DNA-binding superfamily protein	bHLH
Potri.018G141800	-0.568	0.280261	-1.846	4.57232e-08	AT5G57150.1		basic helix-loop-helix (bHLH) DNA-binding superfamily protein	bHLH
Potri.018G144500	-0.709	0.345815	-1.575	0.00965832	AT1G58190.2	AtRLP9,RLP9	receptor like protein 9
Potri.018G144600	-0.217	0.994082	-1.344	0.0010689	AT1G07390.3	AtRLP1,RLP1	receptor like protein 1
Potri.019G004100	-0.552	0.704623	-1.57	0.0342812	AT5G64700.1		nodulin MtN21 /EamA-like transporter family protein
Potri.019G018100	-0.228	0.999108	-1.903	7.41445e-06	AT3G04530.1	ATPPCK2,PEPCK2,PPCK2	phosphoenolpyruvate carboxylase kinase 2
Potri.019G033500	-0.6	0.222408	-0.996	0.018441	AT3G03980.1		NAD(P)-binding Rossmann-fold superfamily protein
Potri.019G038200	-0.458	0.812267	-2.21	3.83082e-05	AT5G17920.1	ATCIMS,ATMETS,ATMS1	Cobalamin-independent synthase family protein
Potri.019G049500	-0.405	0.590102	-1.153	0.0184751	AT1G65060.1	4CL3	4-coumarate:CoA ligase 3
Potri.019G051200	-0.503	0.490634	-1.244	0.00237859	AT4G17900.1		PLATZ transcription factor family protein
Potri.019G053000	-0.522	0.324962	-0.792	0.0471195	AT4G18530.1		Protein of unknown function (DUF707)
Potri.019G053700	-0.176	0.999108	-0.854	0.0263176	AT3G02780.1	IDI2,IPIAT1,IPP2	isopentenyl pyrophosphate:dimethylallyl pyrophosphate isomerase 2
Potri.019G057800	-0.127	0.999108	-1.469	0.00552335	AT5G05270.1		Chalcone-flavanone isomerase family protein
Potri.019G073400	-0.834	0.137597	-1.131	0.0488591	AT1G70170.1	MMP	matrix metalloproteinase
Potri.019G085400	-0.271	0.948026	-1.594	0.000849103	AT1G34370.1	STOP1	C2H2 and C2HC zinc fingers superfamily protein	C2H2
Potri.019G100600	-0.323	0.874174	-1.191	0.0151425	AT4G28290.1
Potri.019G103000	-0.518	0.295032	-1.117	0.00292392	AT4G03420.1		Protein of unknown function (DUF789)
Potri.019G120000	-0.209	0.999108	-1.305	0.0298173	AT4G03230.1		S-locus lectin protein kinase family protein
Potri.019G130700	-0.195	0.999108	-2.005	4.13422e-05	AT2G30490.1	ATC4H,C4H,CYP73A5,REF3	cinnamate-4-hydroxylase
Potri.T035000	0.251	0.971045	-1.234	0.0385105	AT3G62760.1	ATGSTF13	Glutathione S-transferase family protein
Potri.T035400	-0.149	0.999108	-1.341	0.000204282	AT1G02930.1	ATGST1,ATGSTF3,ATGSTF6,ERD11,GST1,GSTF6	glutathione S-transferase 6
Potri.T059900	-0.597	0.379676	-1.558	0.0308621	AT5G37478.1		TPX2 (targeting protein for Xklp2) protein family
Potri.T070100	-0.895	0.0944928	-2.258	5.69462e-06	AT5G17920.1	ATCIMS,ATMETS,ATMS1	Cobalamin-independent synthase family protein
Potri.T094500	-0.398	0.789428	-1.265	0.00913184	AT1G74190.1	AtRLP15,RLP15	receptor like protein 15
Potri.T100200	0.019	0.999108	-1.725	0.000689815
Potri.T121200	0.261	0.985689	-1.655	0.0086318	AT4G13440.1		Calcium-binding EF-hand family protein
Potri.T135400	-0.241	0.960875	-0.944	0.0160332	AT4G25130.1	PMSR4	peptide met sulfoxide reductase 4
Potri.T138300	-1.091	0.0511469	-1.772	0.012412	AT1G79620.1		Leucine-rich repeat protein kinase family protein
Potri.T170200	-0.22	0.985112	-0.88	0.0321542	AT5G53390.1		O-acyltransferase (WSD1-like) family protein
Potri.001G437400	1.288	0.00381956	-1.681	0.0104969	AT1G78380.1	ATGSTU19,GST8,GSTU19	glutathione S-transferase TAU 19
