# Supplementary material for: Overexpression of a serine hydroxymethyltransferase increases biomass production and reduces recalcitrance in the bioenergy crop Populus
Source: Royal Society of Chemistry journal article supplement (doi:10.1039/c8se00471d), 2018-11-02
Supplement: c8se00471d4.xlsx [file c8se00471d4.xlsx]

## Sheet: Table S4
GeneID	#1-Rep1/Ctrl	#1-Rep2/Ctrl		#2-Rep1/Ctrl	#2-Rep2/Ctrl	Annotation				Classification	AtGeneID	AtGeneName	Annotation
Potri.008G108100	2.585	0		6.0444	4.3923	BXL1				Cell Wall	AT5G49360	ATBXL1,BXL1	beta-xylosidase 1
Potri.016G001600	1.4577	2.1635		3	2.4222	C/VIF2				Cell Wall	AT5G64620	ATC/VIF2,C/VIF2	cell wall / vacuolar inhibitor of fructosidase 2
Potri.013G144200	0.737	1.737		6.6958	4.0875	cell wall protein precursor				Cell Wall	AT2G20870		cell wall protein precursor, putative
Potri.015G024200	2.0767	2.6322		1.5421	3.0881	CHIA				Cell Wall	AT5G24090	ATCHIA,CHIA	chitinase A
Potri.008G116900	1.5475	1.6571		3.333	3.4288	GATL3				Cell Wall	AT1G13250	GATL3	galacturonosyltransferase-like 3
Potri.019G070900	4.3825	5.2039		4.5677	1	O-acyltransferase (WSD1-like)				Cell Wall	AT5G53390		O-acyltransferase (WSD1-like) family protein
Potri.T076800	2.75	3.8443		2.826	0.5406	O-acyltransferase (WSD1-like)				Cell Wall	AT5G53390		O-acyltransferase (WSD1-like) family protein
Potri.016G132700	2.7452	2.6243		1.309	-0.0657	Peroxidase				Cell Wall	AT5G05340		Peroxidase superfamily protein
Potri.008G190000	1.3515	1.3119		2.444	3.9397	PG2				Cell Wall	AT1G70370	PG2	polygalacturonase 2
Potri.006G071200	0.4978	0.6576		1.6321	2.2134	XTH23, XTR6				Cell Wall	AT4G25810	XTH23,XTR6	xyloglucan endotransglycosylase 6
Potri.001G071000	1.4746	1.9329		0.4999	1.344	XTH5				Cell Wall	AT5G13870	EXGT-A4,XTH5	xyloglucan endotransglucosylase/hydrolase 5
Potri.013G152400	0.4637	0.1824		3.4918	4.0977	XTH9				Cell Wall	AT4G03210	XTH9	xyloglucan endotransglucosylase/hydrolase 9
Potri.008G120000	1.5738	1.2014		1.5014	0.929	XYL1				Cell Wall	AT1G68560	ATXYL1,TRG1,XYL1	alpha-xylosidase 1
Potri.001G206800	1.127	0.9356		1.6631	1.1796	XYL4				Cell Wall	AT5G64570	ATBXL4,XYL4	beta-D-xylosidase 4
Potri.018G009300	1.888	2.1982		1.7055	1.0927	CSLC5				Cell Wall-cellulose	AT4G31590	ATCSLC05,ATCSLC5,CSLC05,CSLC5	Cellulose-synthase-like C5
Potri.006G004200	1.7618	2.9027		2.9683	2.3344	CSLE1				Cell Wall-cellulose	AT1G55850	ATCSLE1,CSLE1	cellulose synthase like E1
Potri.002G093900	1.3884	1.6175		2.1371	2.0884	Glycosyl hydrolase				Cell Wall-GH	AT1G78060		Glycosyl hydrolase family protein
Potri.002G094000	2.0637	2.0418		2.4921	2.2124	Glycosyl hydrolase				Cell Wall-GH	AT1G78060		Glycosyl hydrolase family protein
Potri.008G013500	1.1288	1.3115		1.9978	1.5107	Glycosyl hydrolase				Cell Wall-GH	AT5G04885		Glycosyl hydrolase family protein
Potri.001G092200	2.3242	2.9713		2.945	2.4249	Glycosyl hydrolase 9C2				Cell Wall-GH	AT1G64390	AtGH9C2,GH9C2	glycosyl hydrolase 9C2
Potri.003G139600	1.3766	1.1658		1.0805	-0.0745	glycosyl hydrolase 9C2				Cell Wall-GH	AT1G64390	AtGH9C2,GH9C2	glycosyl hydrolase 9C2
Potri.009G087700	0.4124	0.8386		1.5661	1.4294	Glycosyl hydrolase family 10				Cell Wall-GH	AT4G33860		Glycosyl hydrolase family 10 protein
Potri.012G106500	0.707	1.1679		1.7206	2.1234	Glycosyl hydrolase family 38				Cell Wall-GH	AT5G13980		Glycosyl hydrolase family 38 protein
Potri.014G092500	0.4621	0.9934		1.7383	1.2172	glycosyl transferase family 1				Cell Wall-GH	AT4G01210		glycosyl transferase family 1 protein
Potri.017G059100	1.8515	1.9194		2.7984	4.9215	GAE6				Cell Wall-Pectin	AT3G23820	GAE6	UDP-D-glucuronate 4-epimerase 6
Potri.008G182200	3.0361	2.9676		2.6681	2.2843	Pectate lyase				Cell Wall-Pectin	AT1G67750		Pectate lyase family protein
Potri.015G087800	3.0783	2.8991		1.8991	2.9853	Pectin lyase-like				Cell Wall-Pectin	AT5G63180		Pectin lyase-like superfamily protein
Potri.002G162400	3.0652	3.2589		4.3294	2.8298	Pectin lyase-like				Cell Wall-Pectin	AT3G61490		Pectin lyase-like superfamily protein
Potri.010G229000	2.0229	1.6033		2.1658	0.585	Pectin lyase-like				Cell Wall-Pectin	AT5G04310		Pectin lyase-like superfamily protein
Potri.001G052300	1.1801	1.0492		1.1428	2.2519	Pectin lyase-like				Cell Wall-Pectin	AT4G13710		Pectin lyase-like superfamily protein
Potri.001G100000	0.5594	0.8027		1.8274	1.8335	Pectin lyase-like				Cell Wall-Pectin	AT4G23500		Pectin lyase-like superfamily protein
Potri.008G189200	2.0435	1.5552		3.9244	4.4297	Pectin lyase-like				Cell Wall-Pectin	AT1G60590		Pectin lyase-like superfamily protein
Potri.010G042100	0.5906	1.2488		3.4794	4.0315	Pectin lyase-like				Cell Wall-Pectin	AT1G60590		Pectin lyase-like superfamily protein
Potri.006G135100	1.6854	1.4614		1.6064	1.2986	pectin methylesterase inhibitor				Cell Wall-Pectin	AT5G20860		Plant invertase/pectin methylesterase inhibitor superfamily
Potri.012G127500	1.1774	2.0012		1.4373	2.7226	pectin methylesterase inhibitor				Cell Wall-Pectin	AT5G62350		Plant invertase/pectin methylesterase inhibitor superfamily protein
Potri.012G014500	1.1676	1.1409		1.0106	0.3172	pectin methylesterase inhibitor				Cell Wall-Pectin	AT3G49220		Plant invertase/pectin methylesterase inhibitor superfamily
Potri.015G013700	0.995	1.1882		1.3229	1.748	pectin methylesterase inhibitor				Cell Wall-Pectin	AT3G49220		Plant invertase/pectin methylesterase inhibitor superfamily
Potri.010G004400	1.5133	2.0852		1.1426	1.2673	Pectinacetylesterase				Cell Wall-Pectin	AT5G26670		Pectinacetylesterase family protein
Potri.013G000900	1.8395	1.2756		1.9745	1.895	Pectinacetylesterase				Cell Wall-Pectin	AT3G05910		Pectinacetylesterase family protein
Potri.015G145400	0.3166	0.4916		0.9867	1.2871	Pectinacetylesterase				Cell Wall-Pectin	AT5G23870		Pectinacetylesterase family protein
Potri.003G072700	1.3725	1.1843		1.1534	1.0951	PME1				Cell Wall-Pectin	AT1G53840	ATPME1,PME1	pectin methylesterase 1
Potri.003G072800	0.4531	0.2447		1.9105	2.605	PME3				Cell Wall-Pectin	AT3G14310	ATPME3,PME3	pectin methylesterase 3
Potri.006G134500	2.1766	1.7871		2.1345	1.9029	PME44				Cell Wall-Pectin	AT4G33220	ATPME44,PME44	pectin methylesterase 44
Potri.005G112000	1.6689	1.1083		1.6735	1.423	MYB4				2nd growth	AT4G38620	ATMYB4,MYB4	myb domain protein 4
Potri.003G146800	0.4514	-0.7875		1.3707	1.8872	CYP78A6				2nd metabolite	AT2G46660	CYP78A6	cytochrome P450, family 78, subfamily A, polypeptide 6
Potri.009G010700	1.3045	0.6187		1.7035	1.3608	CNGC15				cell cycle	AT2G28260	ATCNGC15,CNGC15	cyclic nucleotide-gated channel 15
Potri.006G247200	0.8407	0.7893		1.6392	1.148	CYCA2;1				cell cycle	AT5G25380	CYCA2;1	cyclin a2;1
Potri.014G023000	1.2259	1.8394		1.8692	1.3536	CYCD3;1				cell cycle	AT4G34160	CYCD3,CYCD3;1	CYCLIN D3;1
Potri.009G097800	0.7784	1.0946		2.5486	2.3404	CYCD3;1				cell cycle	AT4G34160	CYCD3,CYCD3;1	CYCLIN D3;1
Potri.005G141900	0.7948	0.9354		1.5185	1.0969	CYCD3;2				cell cycle	AT5G67260	CYCD3;2	CYCLIN D3;2
Potri.011G040500	4.7115	4.5361		3.5607	0.4854	CYCD6;1				cell cycle	AT4G03270	CYCD6;1	Cyclin D6;1
Potri.008G084800	1.7994	2.1165		1.8192	2	DWARF1				cell growth	AT3G19820	CBB1,DIM,DIM1,DWF1,EVE1	cell elongation protein / DWARF1 / DIMINUTO (DIM)
Potri.008G088300	3.5803	3.6423		3.0166	1.3696	EXPA1				cell growth	AT1G69530	AT-EXP1,ATEXP1,ATEXPA1,ATHEXP ALPHA 1.2,EXP1,EXPA1	expansin A1
Potri.010G167200	3.732	3.3105		2.2767	-0.1218	EXPA1				cell growth	AT1G69530	AT-EXP1,ATEXP1,ATEXPA1,ATHEXP ALPHA 1.2,EXP1,EXPA1	expansin A1
Potri.001G240900	2.0229	2.2514		1.8879	1.7604	EXPA4				cell growth	AT2G39700	ATEXP4,ATEXPA4,ATHEXP ALPHA 1.6,EXPA4	expansin A4
Potri.013G060800	2.0815	2.6181		5.2655	5.8417	EXPA15				cell growth	AT2G03090	ATEXP15,ATEXPA15,ATHEXP ALPHA 1.3,EXP15,EXPA15	expansin A15
Potri.002G070100	2.8393	2.0034		2.5611	2.6661	EXT3				cell growth	AT1G21310	ATEXT3,EXT3,RSH	extensin 3
Potri.012G022600	1.026	0.8989		1.272	1.1975	GRF7				cell growth	AT5G53660	AtGRF7,GRF7	growth-regulating factor 7
Potri.001G013000	1.6319	1.6472		0.7653	1.2852	PRX33				cell growth	AT3G49110	ATPCA,ATPRX33,PRX33,PRXCA	peroxidase CA
Potri.002G058700	1.1959	0.8911		2.0388	1.3272	GSL07				Carbohydrate	AT1G06490	ATGSL07,atgsl7,gsl07	glucan synthase-like 7
Potri.005G203500	0.3638	0.5279		1.4966	0.8591	GSL07				Carbohydrate	AT1G06490	ATGSL07,atgsl7,gsl07	glucan synthase-like 7
Potri.001G012200	1.052	1.052		1.6241	1.052	GSL12				Carbohydrate	AT5G13000	ATGSL12,gsl12	glucan synthase-like 12
Potri.005G144900	2.0755	2.0324		2.4053	1.109	AGP18				Carbohydrate	AT4G37450	AGP18,ATAGP18	arabinogalactan protein 18
Potri.014G094800	2.0606	2.1606		1.4832	0.1063	AGP20				Carbohydrate	AT3G61640	AGP20,AtAGP20	arabinogalactan protein 20
Potri.014G135100	2.0633	2.4711		2.4978	1.8916	AGP26				Carbohydrate	AT2G47930	AGP26,ATAGP26	arabinogalactan protein 26
Potri.019G031200	3	4.7279		4.1699	4.2095	APY2				Carbohydrate	AT5G18280	APY2,ATAPY2	apyrase 2
Potri.006G139100	0.5305	0.8301		2.6114	3.152	BGAL7				Carbohydrate	AT5G20710	BGAL7	beta-galactosidase 7
Potri.T177800	2.4109	2.8804		1.826	3.6903	BGLU17				Carbohydrate	AT2G44480	BGLU17	beta glucosidase 17
Potri.001G227400	2	3.6323		3.6323	4.7442	BGLU17				Carbohydrate	AT2G44480	BGLU17	beta glucosidase 17
Potri.005G059500	0.2313	0.8688		2.6826	2.1251	BGLU32				Carbohydrate	AT5G24550	BGLU32	beta glucosidase 32
Potri.008G094200	3.078	3.9175		3.737	3.078	BGLU40				Carbohydrate	AT1G26560	BGLU40	beta glucosidase 40
Potri.001G409900	0.6872	0.5097		2.1834	2.1342	BGLU41				Carbohydrate	AT5G54570	BGLU41	beta glucosidase 41
Potri.012G049300	1	1.5572		1.8707	1.6781	BGLU44				Carbohydrate	AT3G18080	BGLU44	B-S glucosidase 44
Potri.015G041300	0.6301	0.7592		1.2153	1.1221	BGLU44				Carbohydrate	AT3G18080	BGLU44	B-S glucosidase 44
Potri.014G164600	2.0064	2.5191		4.1204	3.4964	Carbohydrate-binding X8				Carbohydrate	AT5G35740		Carbohydrate-binding X8 domain superfamily protein
Potri.012G131400	1.6482	1.9055		3.2147	2.3433	FUC1				Carbohydrate	AT2G28100	ATFUC1,FUC1	alpha-L-fucosidase 1
Potri.002G110300	0.5573	0.8084		1.7912	1.3204	Rhamnogalacturonate lyase				Carbohydrate	AT4G24430		Rhamnogalacturonate lyase family protein
Potri.004G033600	1.3839	1.0825		1.1249	0.5867	STP1				Carbohydrate	AT1G11260	ATSTP1,STP1	sugar transporter 1
Potri.011G042100	0.874	1.01		1.4461	1.5562	STP1				Carbohydrate	AT1G11260	ATSTP1,STP1	sugar transporter 1
Potri.001G240300	1.8361	1.8716		2.8628	2.3785	TPI				Carbohydrate	AT3G55440	ATCTIMC,CYTOTPI,TPI	triosephosphate isomerase
Potri.006G179700	3.1623	3.7876		2.9115	1.6951	UDP-Glycosyltransferase				Carbohydrate	AT5G54010		UDP-Glycosyltransferase superfamily protein
Potri.009G116400	1.0089	0.5912		1.0252	1.3502	CCR1				Circadian	AT4G39260	ATGRP8,CCR1,GR-RBP8,GRP8	cold, circadian rhythm, and RNA binding 1
Potri.009G035000	0.0701	0.6445		1.1896	1.4653	LUX				Circadian	AT3G46640	LUX,PCL1	Homeodomain-like superfamily protein
Potri.005G210200	0.1955	0.2441		1.3455	1.6603	TIC				Circadian	AT3G22380	TIC	time for coffee
Potri.004G156000	1.6602	1.7976		1.4627	0.9839	CIB1				light	AT4G34530	CIB1	cryptochrome-interacting basic-helix-loop-helix 1
Potri.009G117300	1.8983	1.5205		2.2321	1.2636	CIB1				light	AT4G34530	CIB1	cryptochrome-interacting basic-helix-loop-helix 1
Potri.009G101400	2.0617	2.3076		2.4589	1.6822	COR27				light	AT5G42900	COR27	cold regulated gene 27
Potri.014G029000	1.3402	1.3938		2.3402	2.3461	COR27				light	AT5G42900	COR27	cold regulated gene 27
Potri.005G026300	1.9206	1.6845		1.4406	-0.2224	Actin-binding FH2				cytoskeleton	AT3G05470		Actin-binding FH2 (formin homology 2) family protein
Potri.002G110600	0.7521	1.2756		2.7294	2.0375	Di-glucose binding protein with Kinesin motor domain				cytoskeleton	AT2G22610		Di-glucose binding protein with Kinesin motor domain
Potri.011G092500	1.1152	1.307		1.0035	0.8748	MAP65-1				cytoskeleton	AT5G55230	ATMAP65-1,MAP65-1	microtubule-associated proteins 65-1
Potri.001G106700	1.3761	1.9048		2.3158	1.9846	Myosin heavy chain-related				cytoskeleton	AT1G63300		Myosin heavy chain-related protein
Potri.009G025300	1.3034	1.8884		1.3281	-0.3067	myosin-like protein XIF				cytoskeleton	AT2G31900	ATMYO5,ATXIF,XIF	myosin-like protein XIF
Potri.003G126800	0.9129	0.9314		1.88	3.4813	TUB6				cytoskeleton	AT5G12250	TUB6	beta-6 tubulin
Potri.006G035400	0.3033	0.5035		1.0687	1.4453	TUB6				cytoskeleton	AT5G12250	TUB6	beta-6 tubulin
Potri.018G082600	1.415	1.585		4.9149	2.4594	ABIL1				Development	AT2G46225	ABIL1	ABI-1-like 1
Potri.012G130400	0.8696	0.7894		1.8696	1.8401	ERL1				Development	AT5G62230	ERL1	ERECTA-like 1
Potri.001G141700	3.0764	3.2413		2.5797	1.9842	Glycine-rich protein				Development	AT2G36120	DOT1	Glycine-rich protein family
Potri.013G001000	0.9463	0.201		2.5087	2.7111	MYB61				Development	AT1G09540	ATMYB61,MYB61	myb domain protein 61
Potri.008G118300	1.737	1.415		3.6009	2.5525	PAN				Development	AT1G68640	PAN	bZIP transcription factor family protein
Potri.001G133800	2.4854	3.189		3.3103	2.3785	ERD4				Stress	AT1G32090		early-responsive to dehydration stress protein (ERD4)
Potri.009G033900	1.3002	1.4362		1.5261	0.552	CYP707A2				Hormone-ABA	AT2G29090	CYP707A2	cytochrome P450, family 707, subfamily A, polypeptide 2
Potri.018G145800	0.7492	1.0341		1.2688	1.0784	ARF6				Hormone-Auxin	AT1G30330	ARF6	auxin response factor 6
Potri.013G144300	0.339	-0.218		1.1637	1.4334	GH3-10				Hormone-Auxin	AT4G03400	DFL2,GH3-10	Auxin-responsive GH3 family protein
Potri.009G126700	4.3399	3.5236		4.7415	5.6511	SAUR-like				Hormone-Auxin	AT4G38840		SAUR-like auxin-responsive protein family
Potri.007G140700	0.4715	0.8877		1.3943	1.1877	UGT74E2				Hormone-Auxin	AT1G05680	UGT74E2	Uridine diphosphate glycosyltransferase 74E2
Potri.017G099000	0.9471	1.1772		1.7599	2.2721	BR6OX2, CYP85A2				Hormone-BR	AT3G30180	BR6OX2,CYP85A2	brassinosteroid-6-oxidase 2
Potri.001G094800	1.4127	0.664		2.8804	1.9906	CRF2				Hormone-CTK	AT4G23750	CRF2,TMO3	cytokinin response factor 2
Potri.006G041100	2.02	1.7826		2.2643	1.3598	RR9				Hormone-CTK	AT3G57040	ARR9,ATRR4	response regulator 9
Potri.006G253800	2.0682	1.814		3.7635	1.6157	SHN2				Hormone-Eth	AT5G25390	SHN2	Integrase-type DNA-binding superfamily protein
Potri.007G103800	-0.1041	-0.7595		1.8581	2.18	GA20OX2				Hormone-GA	AT5G51810	AT2353,ATGA20OX2,GA20OX2	gibberellin 20 oxidase 2
Potri.003G057400	2	3.2479		6.2095	8.4696	GA3OX1				Hormone-GA	AT1G15550	ATGA3OX1,GA3OX1,GA4	gibberellin 3-oxidase 1
Potri.006G044400	4.0506	4.8365		4.8959	4.7318	Gibberellin-regulated family				Hormone-GA	AT1G74670		Gibberellin-regulated family protein
Potri.019G083900	1.4334	1.364		2.573	2.3785	Gibberellin-regulated family				Hormone-GA	AT1G22690		Gibberellin-regulated family protein
Potri.001G254100	3.9886	5.5196		4.2567	4.9478	Gibberellin-regulated family				Hormone-GA	AT1G74670		Gibberellin-regulated family protein
Potri.009G092600	0.4842	1.1974		1.906	1.6857	Gibberellin-regulated family				Hormone-GA	AT5G59845		Gibberellin-regulated family protein
Potri.007G037700	0.8017	1.391		1.877	1.4248	MES1				Hormone-SA	AT2G23620	ATMES1,MES1	methyl esterase 1
Potri.001G028200	2.8981	2.7961		3.4901	2.241	aspartyl protease				Proteolysis	AT3G54400		Eukaryotic aspartyl protease family protein
Potri.001G041700	1.4251	1.3904		2.0256	1.5983	aspartyl protease				Proteolysis	AT1G79720		Eukaryotic aspartyl protease family protein
Potri.002G171700	2.5102	2.319		2.5946	2.1651	aspartyl protease				Proteolysis	AT1G01300		Eukaryotic aspartyl protease family protein
Potri.016G071900	1.6897	1.0191		1.1812	0.7652	aspartyl protease				Proteolysis	AT3G52500		Eukaryotic aspartyl protease family protein
Potri.001G213600	0.424	0.4504		2.4173	1.9405	aspartyl protease				Proteolysis	AT5G22850		Eukaryotic aspartyl protease family protein
Potri.003G195500	1.8598	1.2895		2.9175	2.815	aspartyl protease				Proteolysis	AT3G54400		Eukaryotic aspartyl protease family protein
Potri.T081500	0.6563	0.1769		1.9359	3.7101	aspartyl protease				Proteolysis	AT1G79720		Eukaryotic aspartyl protease family protein
Potri.007G023600	2.0676	1.8953		2.0086	1.9351	bHLH				TFs	AT2G18300		basic helix-loop-helix (bHLH) DNA-binding superfamily protein
Potri.017G081300	2.0415	2.8244		1.253	2.3646	bHLH				TFs	AT3G28857		basic helix-loop-helix (bHLH) DNA-binding family protein
Potri.003G093200	2.0796	2.4693		3.9632	3.611	bHLH071				TFs	AT5G46690	bHLH071	beta HLH protein 71
Potri.001G141100	1.818	1.7812		3.8947	2.2132	bHLH071				TFs	AT5G46690	bHLH071	beta HLH protein 71
Potri.002G068400	0.7304	0.2847		1.0154	1.5566	GT2				TFs	AT1G76890	AT-GT2,GT2	Duplicated homeodomain-like superfamily protein
Potri.014G155100	1.046	0.3649		2.0155	1.8029	WRKY6				TFs	AT1G62300	ATWRKY6,WRKY6	WRKY family transcription factor
Potri.019G099900	1.2926	2.3331		1.4234	0.1786	NAC071				TFs-Development	AT4G17980	anac071,NAC071	NAC domain containing protein 71
Potri.017G139500	2.70044	2.32193		3.42626	2.39232	NAC028				TFs-Development	AT1G65910.1	anac028,NAC028	NAC domain containing protein 28
GeneID	#1-Rep1/Ctrl	#1-Rep2/Ctrl		#2-Rep1/Ctrl	#2-Rep2/Ctrl	Annotation				Classification	AtGeneID	AtGeneName	Annotation
Potri.019G057800	0.1278	-0.0541		-1.176	-2.3895	Chalcone-flavanone isomerase				Cell Wall	AT5G05270		Chalcone-flavanone isomerase family protein
Potri.019G093900	-1.0394	-0.901		-0.9161	0.7563	CHIV, EP3				Cell Wall	AT3G54420	ATCHITIV,ATEP3,CHIV,EP3	homolog of carrot EP3-3 chitinase
Potri.010G141600	-1.819	-3.1215		-4.0813	-4.4537	CTL2				Cell Wall	AT3G16920	ATCTL2,CTL2	chitinase-like protein 2
Potri.016G070200	-1.0368	-1.0659		-0.8103	-0.8072	DGD1				Cell Wall	AT3G11670	DGD1	UDP-Glycosyltransferase superfamily protein
Potri.001G335900	-0.6899	0.086		-1.1511	-1.1605	FMO1				Cell Wall	AT1G19250	FMO1	flavin-dependent monooxygenase 1
Potri.003G181400	-0.6727	-0.6043		-1.7364	-1.6285	IRX4, CCR1				Cell Wall	AT1G15950	ATCCR1,CCR1,IRX4	cinnamoyl coa reductase 1
Potri.015G060100	-1.5143	-2.8921		-3.056	-3.852	IRX6, COBL				Cell Wall	AT5G15630	COBL4,IRX6	COBRA-like extracellular glycosyl-phosphatidyl inositol-anchored protein family
Potri.009G006500	-0.7435	-0.9944		-1.0155	-1.1383	IRX7, FRA8				Cell Wall	AT2G28110	FRA8,IRX7	Exostosin family protein
Potri.001G416800	-2.2691	-3.9286		-4.2587	-4.388	IRX8, GAUT12				Cell Wall	AT5G54690	GAUT12,IRX8,LGT6	galacturonosyltransferase 12
Potri.011G132600	-3	-6.3219		-7.3219	-6.3219	IRX8, GAUT12				Cell Wall	AT5G54690	GAUT12,IRX8,LGT6	galacturonosyltransferase 12
Potri.006G131000	-2.0381	-2.6756		-4.7751	-3.958	IRX9				Cell Wall	AT2G37090	IRX9	Nucleotide-diphospho-sugar transferases superfamily protein
Potri.016G086400	-1.8138	-2.4132		-3.941	-4.5401	IRX9				Cell Wall	AT2G37090	IRX9	Nucleotide-diphospho-sugar transferases superfamily protein
Potri.003G162000	-3.4529	-4.6049		-5.1898	-5.4529	IRX10				Cell Wall	AT1G27440	ATGUT1,GUT2,IRX10	Exostosin family protein
Potri.001G068100	-2.0701	-2.9081		-2.5365	-3.1747	IRX10				Cell Wall	AT1G27440	ATGUT1,GUT2,IRX10	Exostosin family protein
Potri.009G042500	-2.7242	-5.1263		-4.9337	-5.9337	IRX12, LAC4				Cell Wall	AT2G38080	ATLMCO4,IRX12,LAC4,LMCO4	Laccase/Diphenol oxidase family protein
Potri.006G096900	-2.2401	-3.0106		-4.5131	-7.098	IRX12,LAC4				Cell Wall	AT2G38080	ATLMCO4,IRX12,LAC4,LMCO4	Laccase/Diphenol oxidase family protein
Potri.006G097100	-3.2378	-3.2378		-4.8227	-5.1447	IRX12,LAC4				Cell Wall	AT2G38080	ATLMCO4,IRX12,LAC4,LMCO4	Laccase/Diphenol oxidase family protein
Potri.006G097000	-1.4377	-3.041		-3.8346	-4.7415	IRX12,LAC4				Cell Wall	AT2G38080	ATLMCO4,IRX12,LAC4,LMCO4	Laccase/Diphenol oxidase family protein
Potri.015G040400	0.6464	1.2506		-3.8131	-2.5236	LAC1				Cell Wall	AT1G18140	ATLAC1,LAC1	laccase 1
Potri.015G040600	-0.3939	0.5197		-5.8202	-3.4983	LAC1				Cell Wall	AT1G18140	ATLAC1,LAC1	laccase 1
Potri.015G040700	0.4872	0.8711		-5.8704	-3.5484	LAC1				Cell Wall	AT1G18140	ATLAC1,LAC1	laccase 1
Potri.015G040800	0.1684	0.4355		-6.7142	-4.1293	LAC1				Cell Wall	AT1G18140	ATLAC1,LAC1	laccase 1
Potri.008G073800	0.0034	-0.038		-2.1802	-3.4026	LAC12				Cell Wall	AT5G05390	LAC12	laccase 12
Potri.006G087500	-0.1242	-1.9578		-7.2432	-6.2432	LAC17				Cell Wall	AT5G60020	ATLAC17,LAC17	laccase 17
Potri.011G120200	-2.0516	-4.3735		-6.1809	-7.5028	LAC17				Cell Wall	AT5G60020	ATLAC17,LAC17	laccase 17
Potri.011G120300	-2.1627	-3.8499		-6.0322	-5.4847	LAC17				Cell Wall	AT5G60020	ATLAC17,LAC17	laccase 17
Potri.008G073700	-1.0818	-3.5293		-5.9887	-6.9887	LAC5				Cell Wall	AT2G40370	LAC5	laccase 5
Potri.001G352300	-1.0925	-0.9851		-1.4065	-2.1435	RWA3				Cell Wall	AT2G34410		O-acetyltransferase family protein
Potri.T170200	0.1504	-0.3932		-0.9152	-0.8734	WSD11				Cell Wall	AT5G53390		O-acyltransferase (WSD1-like) family protein
Potri.012G006400	-1.6075	-1.4677		-3.6336	-3.4116	OMT1				Cell Wall	AT5G54160	ATOMT1,OMT1	O-methyltransferase 1
Potri.007G019300	-3.2004	-4.504		-5.9039	-6.4888	Peroxidase				Cell Wall	AT5G66390		Peroxidase superfamily protein
Potri.007G107200	-1.7438	-2.3424		-1.6643	-3.3018	PGSIP1				Cell Wall	AT3G18660	GUX1,PGSIP1	plant glycogenin-like starch initiation protein 1
Potri.014G029900	-1.7661	-2.2541		-2.2007	-2.6844	PGSIP3				Cell Wall	AT4G33330	GUX2,PGSIP3	plant glycogenin-like starch initiation protein 3
Potri.013G157900	-0.4799	-0.7263		-1.9703	-2.171	C4H, CYP73A5				lignin	AT2G30490	ATC4H,C4H,CYP73A5,REF3	cinnamate-4-hydroxylase
Potri.019G130700	0.1943	-0.3391		-1.7527	-3.3961	C4H, CYP73A5				lignin	AT2G30490	ATC4H,C4H,CYP73A5,REF3	cinnamate-4-hydroxylase
Potri.008G136600	-1.1914	-1.2748		-3.128	-2.7723	CCOAMT				lignin	AT1G67980	CCOAMT	caffeoyl-CoA 3-O-methyltransferase
Potri.009G099800	-1.0753	-1.1514		-2.1485	-2.4002	CCoAOMT1				lignin	AT4G34050	CCoAOMT1	S-adenosyl-L-methionine-dependent methyltransferases superfamily protein
Potri.001G304800	-0.8744	-0.2388		-2.8906	-1.7085	CCoAOMT1				lignin	AT4G34050	CCoAOMT1	S-adenosyl-L-methionine-dependent methyltransferases superfamily protein
Potri.006G226700	-1.0275	-1.0263		-1.0021	-0.5811	CYP711A1,MAX1				lignin	AT2G26170	CYP711A1,MAX1	cytochrome P450, family 711, subfamily A, polypeptide 1
Potri.005G117500	-3.0343	-3.5972		-3.6991	-3.7712	CYP84A1, F5H				lignin	AT4G36220	CYP84A1,FAH1	ferulic acid 5-hydroxylase 1
Potri.007G016400	-1.4605	-0.7609		-2.9027	-2.4039	CYP84A1, F5H				lignin	AT4G36220	CYP84A1,FAH1	ferulic acid 5-hydroxylase 1
Potri.006G033300	-0.7235	-0.8717		-2.7481	-2.9048	CYP98A3, C3H				lignin	AT2G40890	CYP98A3	cytochrome P450, family 98, subfamily A, polypeptide 3
Potri.010G074800	-0.1611	-0.005		-0.9328	-0.8708	CSLG2				Cell Wall-cellulose	AT4G24000	ATCSLG2,CSLG2	cellulose synthase like G2
Potri.002G257900	-2.1518	-3.3905		-3.8132	-4.4609	IRX5, CESA4				Cell Wall-cellulose	AT5G44030	CESA4,IRX5,NWS2	cellulose synthase A4
Potri.018G103900	-1.9671	-2.6668		-2.0606	-2.6395	IRX3, CESA7				Cell Wall-cellulose	AT5G17420	ATCESA7,CESA7,IRX3,MUR10	Cellulose synthase family protein
Potri.011G069600	-1.9517	-2.5692		-2.834	-3.4083	IRX1, CESA8				Cell Wall-cellulose	AT4G18780	ATCESA8,CESA8,IRX1,LEW2	cellulose synthase family protein
Potri.002G233400	-3.0952	-4.1623		-4.8541	-8.5546	RIC4				Cell Wall-cellulose	AT5G16490	RIC4	ROP-interactive CRIB motif-containing protein 4
Potri.014G147000	-2.4817	-2.753		-3.3631	-4.611	RIC4				Cell Wall-cellulose	AT5G16490	RIC4	ROP-interactive CRIB motif-containing protein 4
Potri.019G053300	-2.2928	-2.5032		-1.7356	-2.3346	RIC4				Cell Wall-cellulose	AT5G16490	RIC4	ROP-interactive CRIB motif-containing protein 4
Potri.T058500	-2.1384	-2.4407		-2.2578	-2.111	RIC4				Cell Wall-cellulose	AT5G16490	RIC4	ROP-interactive CRIB motif-containing protein 4
Potri.012G142300	-1.9954	-2.2331		-2.2548	-3.5443	Pectinacetylesterase				Cell Wall-Pectin	AT5G23870		Pectinacetylesterase family protein
Potri.002G251200	-1.1068	-1.5095		-1.3259	-0.8608	Lactoylglutathione lyase				2nd metabolite	AT5G48480		Lactoylglutathione lyase / glyoxalase I family protein
Potri.007G015100	-0.6967	-0.8838		-1.5341	-1.3403	Lactoylglutathione lyase				2nd metabolite	AT1G15380		Lactoylglutathione lyase / glyoxalase I family protein
Potri.001G036900	-0.7817	-0.5079		-2.3056	-1.8382	4CL2				2nd metabolite	AT3G21240	4CL2,AT4CL2	4-coumarate:CoA ligase 2
Potri.019G049500	-0.2541	-0.3262		-0.7666	-1.9044	4CL3				2nd metabolite	AT1G65060	4CL3	4-coumarate:CoA ligase 3
Potri.014G072000	-0.6113	-0.7434		-1.261	-1.5804	CYP704A2				2nd metabolite	AT2G45510	CYP704A2	cytochrome P450, family 704, subfamily A, polypeptide 2
Potri.012G089900	-0.5286	0.3055		-2.0372	-1.9482	CYP71A25				2nd metabolite	AT3G48280	CYP71A25	cytochrome P450, family 71, subfamily A, polypeptide 25
Potri.012G090000	-0.2403	-0.1898		-1.5732	-1.3622	CYP71B37				2nd metabolite	AT3G26330	CYP71B37	cytochrome P450, family 71, subfamily B, polypeptide 37
Potri.001G113900	-0.8923	-0.7032		-1.075	-1.938	CYP76C4				2nd metabolite	AT2G45550	CYP76C4	cytochrome P450, family 76, subfamily C, polypeptide 4
Potri.001G054800	-0.6296	-1.6658		-3.8537	-7.2847	CYP78A10				2nd metabolite	AT1G74110	CYP78A10	cytochrome P450, family 78, subfamily A, polypeptide 10
Potri.002G033600	0.4658	0.0168		-0.8883	-2.1975	TT3				2nd metabolite	AT5G42800	DFR,M318,TT3	dihydroflavonol 4-reductase
Potri.005G229500	-0.0479	-0.3994		-2.033	-3.2436	TT3				2nd metabolite	AT5G42800	DFR,M318,TT3	dihydroflavonol 4-reductase
Potri.014G145100	0.9012	0.2703		-1.2972	-3.0638	TT4, CHS				2nd metabolite	AT5G13930	ATCHS,CHS,TT4	Chalcone and stilbene synthase family protein
Potri.001G051500	0.7235	-0.1284		-1.1864	-2.8289	TT4, CHS				2nd metabolite	AT5G13930	ATCHS,CHS,TT4	Chalcone and stilbene synthase family protein
Potri.001G051600	0.1529	-0.1697		-1.2396	-2.8559	TT4, CHS				2nd metabolite	AT5G13930	ATCHS,CHS,TT4	Chalcone and stilbene synthase family protein
Potri.010G213000	0.1725	0.242		-1.028	-2.2803	TT5, CFI				2nd metabolite	AT3G55120	A11,CFI,TT5	Chalcone-flavanone isomerase family protein
Potri.005G113700	0.0135	0.5444		-1.5999	-2.9889	TT6, F3H				2nd metabolite	AT3G51240	F3\'H,F3H,TT6	flavanone 3-hydroxylase
Potri.005G113900	0.8203	0.4288		-1.5803	-2.9752	TT6, F3H				2nd metabolite	AT3G51240	F3\'H,F3H,TT6	flavanone 3-hydroxylase
Potri.005G114000	1.1063	0.5668		-1.2479	-3.0857	TT6, F3H				2nd metabolite	AT3G51240	F3\'H,F3H,TT6	flavanone 3-hydroxylase
Potri.002G054100	-0.2604	-0.0539		-1.0958	-2.7238	TT8				2nd metabolite	AT4G09820	BHLH42,TT8	basic helix-loop-helix (bHLH) DNA-binding superfamily protein
Potri.005G208600	-0.0098	-0.2689		-1.0981	-1.8304	TT8				2nd metabolite	AT4G09820	BHLH42,TT8	basic helix-loop-helix (bHLH) DNA-binding superfamily protein
Potri.009G092300	-0.41	-1.5091		-3.7592	-3.9844	AGP18				Carbohydrate	AT4G37450	AGP18,ATAGP18	arabinogalactan protein 18
Potri.010G132500	-1.39	-3.0888		-3.5876	-5.3038	AGP19				Carbohydrate	AT1G68725	AGP19,ATAGP19	arabinogalactan protein 19
Potri.016G057400	-0.1224	0.4018		-1.2782	-1.0728	BG1				Carbohydrate	AT3G57270	BG1	beta-1,3-glucanase 1
Potri.006G144500	-1.5425	-2.2248		-2.4031	-0.5115	BGAL1				Carbohydrate	AT3G13750	BGAL1	beta galactosidase 1
Potri.006G062200	-1.4594	-1.9826		-2.3663	-2.974	glucuronidase 3				Carbohydrate	AT5G34940	AtGUS3,GUS3	glucuronidase 3
Potri.004G123600	-1.1899	-1.5533		-2.206	-2.6732	Glycosyl transferase 35				Carbohydrate	AT3G29320		Glycosyl transferase, family 35
Potri.014G116800	-1.8665	-2.6113		-2.3889	-2.607	GolS1				Carbohydrate	AT2G47180	AtGolS1,GolS1	galactinol synthase 1
Potri.013G005800	0.129	-0.5826		-1.6614	-1.3219	GolS2				Carbohydrate	AT1G56600	AtGolS2,GolS2	galactinol synthase 2
Potri.013G005900	-0.6342	-0.5645		-1.1579	-0.9396	GolS2				Carbohydrate	AT1G56600	AtGolS2,GolS2	galactinol synthase 2
Potri.008G189400	-1.8042	-2.33		-2.4594	-1.5442	GolS4				Carbohydrate	AT1G60470	AtGolS4,GolS4	galactinol synthase 4
Potri.010G042000	-0.4015	-0.9183		-0.7274	-1.5047	GolS4				Carbohydrate	AT1G60470	AtGolS4,GolS4	galactinol synthase 4
Potri.004G019900	-0.7833	-1.2387		-1.9935	-4.8494	GPT2				Carbohydrate	AT1G61800	ATGPT2,GPT2	glucose-6-phosphate/phosphate translocator 2
Potri.018G000900	0.1647	-0.8049		-2.9493	-2.2903	O-Glycosyl hydrolases family 17				Carbohydrate	AT4G31140		O-Glycosyl hydrolases family 17 protein
Potri.001G109800	-0.6269	-0.8621		-1.5808	-3.4775	PP2-A12				Carbohydrate	AT1G12710	AtPP2-A12,PP2-A12	phloem protein 2-A12
Potri.018G063500	-0.6113	-0.7885		-1.8904	-1.9811	SUS4				Carbohydrate	AT3G43190	ATSUS4,SUS4	sucrose synthase 4
Potri.008G094300	-1.2554	-2.3519		-3.6373	-4.4047	UDP-glucose 6-dehydrogenase				Carbohydrate	AT3G29360		UDP-glucose 6-dehydrogenase family protein
Potri.004G118600	-0.6802	-1.3571		-1.6397	-1.7835	UDP-glucose 6-dehydrogenase				Carbohydrate	AT5G15490		UDP-glucose 6-dehydrogenase family protein
Potri.001G449500	-1.1643	-0.958		-1.9736	-2.2149	UDP-Glycosyltransferase				Carbohydrate	AT1G32900		UDP-Glycosyltransferase superfamily protein
Potri.004G214100	-0.1068	-0.313		-0.7053	-1.2159	UDP-Glycosyltransferase				Carbohydrate	AT2G36970		UDP-Glycosyltransferase superfamily protein
Potri.017G092000	0.4224	-0.1038		-1.1017	-0.8209	UGD2				Carbohydrate	AT3G29360		UDP-glucose 6-dehydrogenase family protein
Potri.016G016500	-0.3867	-0.2537		-2.1414	-1.72	UGT				Carbohydrate	AT3G21790		UDP-Glycosyltransferase superfamily protein
Potri.016G016900	-0.083	-0.078		-1.081	-1.562	UGT71B1				Carbohydrate	AT3G21750	UGT71B1	UDP-glucosyl transferase 71B1
Potri.009G095400	-0.7191	-0.364		-1.1773	-2.1123	UGT84A1				Carbohydrate	AT4G15480	UGT84A1	UDP-Glycosyltransferase superfamily protein
Potri.017G052300	-1.9546	-2.6754		-2.2488	-0.53	UGT85A2				Carbohydrate	AT1G22360	AtUGT85A2,UGT85A2	UDP-glucosyl transferase 85A2
Potri.015G027700	-0.3071	-0.0647		-1.0329	-2.0934	UGT88A1				Carbohydrate	AT3G16520	UGT88A1	UDP-glucosyl transferase 88A1
Potri.014G129200	0.4476	0.0724		-1.038	-1.2558	UXS2				Carbohydrate	AT3G62830	ATUXS2,AUD1,UXS2	NAD(P)-binding Rossmann-fold superfamily protein
Potri.001G237200	-1.2952	-1.8313		-4.1054	-4.8599	UXS5				Carbohydrate	AT3G46440	UXS5	UDP-XYL synthase 5
Potri.010G207200	-0.8505	-0.9831		-2.134	-2.2521	UXS6				Carbohydrate	AT2G28760	UXS6	UDP-XYL synthase 6
Potri.009G006600	-0.1126	-1.2143		-2.7831	-3.9896	XTH32				Carbohydrate	AT2G36870	XTH32	xyloglucan endotransglucosylase/hydrolase 32
Potri.007G008500	-0.8311	-1.4546		-0.9918	0.7124	XTH6				Carbohydrate	AT5G65730	XTH6	xyloglucan endotransglucosylase/hydrolase 6
Potri.005G209800	-0.5498	-0.5926		-0.7247	-0.9755	CYCP1;1				cell cycle	AT3G63120	CYCP1;1	cyclin p1;1
Potri.002G143400	-2.2424	-1.6226		-2.8995	-2.845	CYCP3;2				cell cycle	AT3G60550	CYCP3;2	cyclin p3;2
Potri.012G114600	0.1049	-0.7566		-2.5546	-2.6565	CYCP4;1				cell cycle	AT2G44740	CYCP4;1	cyclin p4;1
Potri.004G173800	-1.4341	-0.6488		-2.0191	-2.1474	ADF5				cytoskeleton	AT2G16700	ADF5,ATADF5	actin depolymerizing factor 5
Potri.010G067100	-2.1281	-2.1699		-2.5944	-2.7549	arpc2b				cytoskeleton	AT2G33385	arpc2b	actin-related protein C2B
Potri.001G055100	-3.0276	-3.2105		-2.1346	-2.7761	MAP65-8				cytoskeleton	AT1G27920	MAP65-8	microtubule-associated protein 65-8
Potri.001G289500	-1.1366	-1.1857		-2.4177	-2.8897	TUA6				cytoskeleton	AT4G14960	TUA6	Tubulin/FtsZ family protein
Potri.009G067200	-1.0948	-1.4968		-2.3135	-2.9446	TUB6				cytoskeleton	AT5G12250	TUB6	beta-6 tubulin
Potri.002G079000	-3.8962	-3.2587		-3.6067	-3.8962	PI				Development	AT5G20240	PI	K-box region and MADS-box transcription factor family protein
Potri.010G179700	0.2332	-0.7454		-3.6105	-3.0959	FT				Development	AT1G65480	FT	PEBP (phosphatidylethanolamine-binding protein) family protein
Potri.004G140600	-1.1188	-0.9023		-0.9494	-1.2633	ABF3				Hormone-ABA	AT4G34000	ABF3,DPBF5	abscisic acid responsive elements-binding factor 3
Potri.010G156600	-2.1847	-3.1847		-2.6917	-2.9854	Auxin-responsive family protein				Hormone-Auxin	AT5G47530		Auxin-responsive family protein
Potri.019G103500	-1.3064	-2.2709		-0.5582	0.0369	DFL2,GH3-10				Hormone-Auxin	AT4G03400	DFL2,GH3-10	Auxin-responsive GH3 family protein
Potri.006G137200	-0.8835	-0.4709		-1.5398	-2.1565	SAUR-like				Hormone-Auxin	AT5G20810		SAUR-like auxin-responsive protein family
Potri.004G099400	-2.0189	-1.3841		-3.5663	-2.5663	BEE3				Hormone-BR	AT1G73830	BEE3	BR enhanced expression 3
Potri.003G035900	-1.245	-1.1699		-1.1389	-0.9838	CYP90D1				Hormone-BR	AT3G13730	CYP90D1	cytochrome P450, family 90, subfamily D, polypeptide 1
Potri.003G038200	-1.0051	-1.3015		-1.2518	-1.26	CYP90D1				Hormone-BR	AT3G13730	CYP90D1	cytochrome P450, family 90, subfamily D, polypeptide 1
Potri.006G221000	-1.0861	-1.2753		-0.2289	0.0276	CKX7				Hormone-CTK	AT5G21482	ATCKX5,CKX7	cytokinin oxidase 7
Potri.001G378400	-0.277	-0.2243		-1.1487	-2.189	GA2OX1				Hormone-GA	AT1G78440	ATGA2OX1,GA2OX1	Arabidopsis thaliana gibberellin 2-oxidase 1
Potri.014G135900	-1.2558	-0.8604		-1.3936	0.3804	GID1B				Hormone-GA	AT3G63010	ATGID1B,GID1B	alpha/beta-Hydrolases superfamily protein
Potri.001G279500	-1.6877	-1.7965		-2.4448	-2.3869	BAG4				Stress	AT3G51780	ATBAG4,BAG4	BCL-2-associated athanogene 4
Potri.013G156000	-0.7804	-0.6477		-1.1458	-0.7791	CIPK10				Stress	AT5G58380	CIPK10,PKS2,SIP1,SNRK3.8	SOS3-interacting protein 1
Potri.006G068400	-0.8718	-0.395		-0.7586	-0.9282	CIPK24,SOS2				Stress	AT5G35410	ATSOS2,CIPK24,SNRK3.11,SOS2	Protein kinase superfamily protein
Potri.001G353500	-0.5969	-0.6377		-1.6011	-2.2698	COR314-TM2				Stress	AT1G29390	COR314-TM2,COR413IM2	cold regulated 314 thylakoid membrane 2
Potri.006G074900	-1.1901	-1.0216		-1.9856	-1.9904	bHLH				TFs	AT5G57150		basic helix-loop-helix (bHLH) DNA-binding superfamily protein
Potri.004G158200	-0.1426	-0.725		-0.765	-0.858	bZIP44				TFs	AT1G75390	AtbZIP44,bZIP44	basic leucine-zipper 44
Potri.005G161500	-1.0107	-1.1699		-2.5533	-4.2695	HB16				TFs	AT4G40060	ATHB-16,ATHB16,HB16	homeobox protein 16
Potri.006G049200	-1.0071	-0.1403		-4.3576	-3.22	HSFB3				TFs	AT2G41690	AT-HSFB3,HSFB3	heat shock transcription factor B3
Potri.004G100100	-0.6625	-0.2676		-2.2082	-1.7874	LBD41				TFs	AT3G02550	LBD41	LOB domain-containing protein 41
Potri.002G180800	-0.7515	-0.8973		-0.9544	-1.081	LHY1				TFs	AT1G01060	LHY,LHY1	Homeodomain-like superfamily protein
Potri.006G221800	-0.9581	-0.9397		-1.824	-2.7713	MYB4				TFs	AT4G38620	ATMYB4,MYB4	myb domain protein 4
Potri.006G221200	-0.6209	-0.9823		-1.671	-2.1418	MYB5				TFs	AT3G13540	ATMYB5,MYB5	myb domain protein 5
Potri.014G100800	-0.7312	-0.8725		-2.96	-3.96	MYB7				TFs	AT2G16720	ATMYB7,ATY49,MYB7	myb domain protein 7
Potri.003G114100	-4.6088	-5.3458		-4.6088	-5.3458	MYB42				TFs	AT4G12350	AtMYB42,MYB42	myb domain protein 42
Potri.001G258700	-1.9344	-2.9668		-2.4263	-3.0339	MYB46				TFs	AT5G12870	ATMYB46,MYB46	myb domain protein 46
Potri.009G053900	-1.0757	-2.4743		-5.9337	-5.9337	MYB46				TFs	AT5G12870	ATMYB46,MYB46	myb domain protein 46
Potri.001G235500	-0.8105	-0.2039		-2.5087	-1.5628	MYB48				TFs	AT3G46130	ATMYB48,ATMYB48-1,ATMYB48-2,ATMYB48-3,MYB48	myb domain protein 48
Potri.015G082700	-3.1646	-2.4276		-4.3345	-3.7984	MYB50				TFs	AT1G57560	AtMYB50,MYB50	myb domain protein 50
Potri.007G134500	-2.5208	-2.9569		-7.0444	-4.4594	MYB52				TFs	AT1G17950	ATMYB52,BW52,MYB52	myb domain protein 52
Potri.015G033600	-3.4655	-4.9849		-8.8918	-6.3068	MYB52				TFs	AT1G17950	ATMYB52,BW52,MYB52	myb domain protein 52
Potri.007G067600	-1.9452	-1.8008		-4.9707	-3.6906	MYB63				TFs	AT1G79180	ATMYB63,MYB63	myb domain protein 63
Potri.005G096600	-1.7455	-0.5037		-6.6592	-4.6592	MYB63				TFs	AT1G79180	ATMYB63,MYB63	myb domain protein 63
Potri.018G127700	0.7729	0.2391		-1.9069	-2.5743	MYB82				TFs	AT5G52600	AtMYB82,MYB82	myb domain protein 82
Potri.012G084100	-0.5002	-0.6826		-1.2121	-1.2186	MYB86				TFs	AT5G26660	ATMYB86,MYB86	myb domain protein 86
Potri.008G148400	-0.2178	-0.2502		-1.1449	-2.0467	MYB88				TFs	AT2G02820	AtMYB88,MYB88	myb domain protein 88
Potri.003G132000	-3.5983	-5.7682		-5.7682	-5.7682	MYB103				TFs	AT1G63910	AtMYB103,MYB103	myb domain protein 103
Potri.001G099800	-3.3123	-4.8972		-7.2192	-7.2192	MYB103				TFs	AT1G63910	AtMYB103,MYB103	myb domain protein 103
Potri.006G221500	-0.6482	-0.9368		-0.9523	-2.1713	MYB123, TT2				TFs	AT5G35550	ATMYB123,ATTT2,MYB123,TT2	Duplicated homeodomain-like superfamily protein
Potri.001G448400	-2.2536	-3.1161		-4.1832	-3.1161	NST1a, NAC043				TFs	AT2G46770	ANAC043,EMB2301,NST1	NAC (No Apical Meristem) domain transcriptional regulator superfamily protein
Potri.002G178700	-0.4739	-1.0324		-2.7263	-3.4919	NST1b, NAC043				TFs	AT2G46770	ANAC043,EMB2301,NST1	NAC (No Apical Meristem) domain transcriptional regulator superfamily protein
Potri.011G153300	-2.0369	-3.405		-4.439	-5.5094	NST1c, NAC043				TFs	AT2G46770	ANAC043,EMB2301,NST1	NAC (No Apical Meristem) domain transcriptional regulator superfamily protein
Potri.014G104800	-0.3615	-1.0608		-6.015	-6.015	NST1d, NAC043				TFs	AT2G46770	ANAC043,EMB2301,NST1	NAC (No Apical Meristem) domain transcriptional regulator superfamily protein
Potri.005G069500	-1.2976	-1.2176		-0.9864	0.0654	NAC002				TFs	AT1G01720	ANAC002,ATAF1	NAC (No Apical Meristem) domain transcriptional regulator superfamily protein
Potri.010G166200	-3.971	-3.971		-1.3012	-0.1825	NAC029				TFs	AT1G69490	ANAC029,ATNAP,NAP	NAC-like, activated by AP3/PI
Potri.013G054000	-1.1717	-1.6362		-0.47	-0.5733	NAC047				TFs	AT3G04070	anac047,NAC047	NAC domain containing protein 47
Potri.001G404400	-2.0753	-2.4497		-4.0346	-1.9192	NAC056				TFs	AT3G15510	ANAC056,ATNAC2,NAC2,NARS1	NAC domain containing protein 2
Potri.001G218800	-1.8617	-1.4966		-2.7573	0.9052	NAC061				TFs	AT3G44350	anac061,NAC061	NAC domain containing protein 61
Potri.009G019200	-0.6377	-0.7533		-1.147	0.5499	NAC061				TFs	AT3G44350	anac061,NAC061	NAC domain containing protein 61
Potri.001G372100	-0.468	-0.4889		-0.919	-1.4769	NF-YA7				TFs	AT1G30500	NF-YA7	nuclear factor Y, subunit A7
Potri.013G041000	-0.8541	-0.6004		-2.7472	-2.8541	UNE12				TFs	AT4G02590	UNE12	basic helix-loop-helix (bHLH) DNA-binding superfamily protein
Potri.002G008800	-0.4019	-0.6298		-1.057	-1.271	WOX13				TFs	AT4G35550	ATWOX13,HB-4,WOX13	WUSCHEL related homeobox 13
Potri.005G114700	-1.3341	-1.7633		-2.4263	-2.4982	WUS1				TFs	AT2G17950	PGA6,WUS,WUS1	Homeodomain-like superfamily protein
