# Supplementary material for: Overexpression of a serine hydroxymethyltransferase increases biomass production and reduces recalcitrance in the bioenergy crop Populus
Source: Royal Society of Chemistry journal article supplement (doi:10.1039/c8se00471d), 2018-11-02
Supplement: c8se00471d5.xlsx [file c8se00471d5.xlsx]

## Sheet: Sheet1
	Gene Name	Gene ID	Forward Primers	Reverse Primers
	Ubq10b	Potri.001G263000	GCCTTCGTGGTGGTTATTAAGC	TCCAACAATGGCCAGTAAACAC
	SHMT2	Potri.001G320400	TGCCTTGAAACAGGTCCAAAC	ACAGAACGAGGTGGTTCTCAGTT
hubTF	MYB4	Potri.005G112000	GATAAGCGTCTCGTTGCTTATATCCA	GCGTAGATAGTTGATCCATCGAAGACG
hubTF	CIB1b	Potri.009G117300	AAACAGTCGCAACAATAACACC	TTTCCCTCCTCACTCTTTCAG
hubTF	WRKY6	Potri.014G155100	GTTATCCCATCACCAACAATAGCA	TTCTCCACTTTCATTCGTTCTACC
hubTF	NST1a, NAC12	Potri.001G448400	CTCAGACAATAGCATCAGTGATGGG	GATCTTGATCAAAAGATGGACTGCTTAG
hubTF	NST1c, NAC12	Potri.011G153300	GGCATGCAATTATCACACAAACAGC	GGAGATGATGATTTAGTAAGGCTCCAC
hubTF	NST1b, NAC061	Potri.002G178700	TCTCAACAAAACCCTAGACAGAGCTATG	GCAAGTACTTCCCATGTAATGAAGCATT
hubTF	NST1d, NAC065	Potri.014G104800	GCGATGAAGGCACTATAGATCAGACAT	GTCAACAGGCCTGAGATATCTAGCAG
hubTF	TT8	Potri.005G208600	ACAGACAAGGTTCAAGAGGA	ATAGAAGGGAGGAATGGGTG
	HBI1	Potri.007G023600	CTTAGCAGAAAGAGCCAGGAG	GGTCTTCGATTTACAGCAGCA
	GT2	Potri.002G068400	AGATTATGCTGTCAAGCCCA	CTCCCTCATCCTCTTCATCAG
	MYB46	Potri.001G258700	TACAGGATAATAGCACTGACAAGCA	CAGTACTCCCCCACTTTTAACTCTT
	MYB83	Potri.001G267300	AAACTTAGAAAGGGCTTATGGTCAC	GGTCAGGTCTCAAATAGTTAATCCA
	MYB63	Potri.005G096600	TTCAGCAAAGAGGAAGAAGACAC	TAGATGTAGACGAGGACGAGGAG
	MYB7	Potri.014G100800	AGCTGGTCTCCTCAGATGTG	GTCTCTTAACGAGATGAGTGTTCC
	NAC029b	Potri.010G166200	GCAATTACCTGAGAAAGCGGA	CTTGACACCAACATATTTAGAGCC
	NAC056	Potri.001G404400	AAGCCAGTATTATCTTCAGGAGGT	CCCAATCATCAAGCCTTAAAGAG
